# Supplementary material for: Synthesis of rocaglamide derivatives and evaluation of their Wnt signal inhibitory activities
Source: Royal Society of Chemistry journal article supplement (doi:10.1039/c5ob02537k), 2016-01-01

## Supporting Information

### Synthesis of Rocaglamide Derivatives and Evaluation of Wnt Signal Inhibitory Activity

Midori A. Arai,\* Yuuki Kofuji, Yuuki Tanaka, Natsuki Yanase, Kazuki Yamaku, Rolly G. Fuentes, Utpal Kumar Karmakar and Masami Ishibashi\*

#### Contents

S1~S23 Experimental data

S24~S31 X-ray Structure Report.

S32~ <sup>1</sup>H and <sup>13</sup>C NMR spectra.

#### General experimental procedure

NMR spectra were recorded on JEOL ECP400 and ECP600 spectrometers in a deuterated solvent whose chemical shift was taken as an internal standard. Mass spectra were obtained using AccuTOF LC-plus JMS-T100LP (JEOL). IR spectra were measured on ATR on a JASCO FT-IR 230 spectrophotometer. Column chromatography was performed using silica gel PSQ100B (Fuji Silysia Chemical Ltd., Kasugai, Japan) and silica gel 60N (Kanto Chemical Co., Inc., Tokyo, Japan). Photochemical reactions were carried out using HL-400B-8 (400 W, 33 A; mercury lamp) and HB400P-1 (400 W) (SEN Light Co., Osaka, Japan) with cooling system consists of TRL-117ST and TC-107E (THOMAS, KAGAKU Co., Ltd., Tokyo, Japan). Mercury lamp was cooled using glass container (Pyrex) (USHIO Inc., Tokyo, Japan) with water.

#### 2-hydroxy-4,6-dimethoxyacetophenone (**8**)

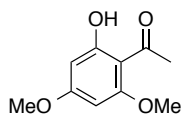

The mixture of 2,4,6-trihydroxyacetophenone (4.0 g, 21.4 mmol), K<sub>2</sub>CO<sub>3</sub> (16.0 g, 115.6 mmol), and methyl trifluoromethanesulfonate (6.6 mL, 59.9 mmol) in dry acetone (107 mL) was stirred

for 3 h under reflux condition. The reaction mixture was filtered on celite and then filtrate was concentrated. The resulting residue was diluted with H<sub>2</sub>O and then extracted with EtOAc. The organic layer was dried over Na<sub>2</sub>SO<sub>4</sub> and concentrated *in vacuo*. The crude oil was purified by silicagel column chromatography (hexane:AcOEt = 25:1) to afford **8** (3.61 g, 18.8 mmol, 88%). IR (ATR): 3099, 3006, 2945, 2849, 1612, 1593, 1456, 1439, 1422, 1388, 1365, 1322, 1267, 1219, 1204, 1155, 1110, 1080, 1044, 1029, 997, 961, 941, 893, 835, 804 cm<sup>-1</sup>.

<sup>1</sup>H-NMR (400 MHz, CDCl<sub>3</sub>): δ 14.04 (s, 1H), 6.06 (d, *J* = 2.2 Hz, 1H), 5.92 (d, *J* = 2.2 Hz, 1H), 3.86 (s, 3H), 3.82 (s, 3H), 2.61 (s, 3H).

<sup>13</sup>C-NMR (100 MHz, CDCl<sub>3</sub>): δ 203.1, 167.5, 166.0, 162.9, 105.9, 93.4, 90.7, 55.5, 55.5, 32.9.

ESI-HRMS [M-H]<sup>-</sup>: calcd for C<sub>10</sub>H<sub>11</sub>O<sub>4</sub> 195.0657, found 195.0609.

#### 2-hydroxy-1-(2-hydroxy-4,6-dimethoxyphenyl)ethan-1-one (**9**)

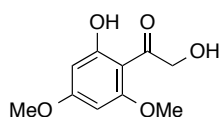

A solution of **8** (400 mg, 2.0 mmol) in CH<sub>2</sub>Cl<sub>2</sub> (5.2 mL) was cooled to 0 °C and added triethylamine (832 μL, 6.0 mmol) and TBSOTf (1.1 mL, 5.6 mmol). The reaction mixture was stirred for 30 min and the reaction was quenched with sat. aq. NaHCO<sub>3</sub>. The mixture was extracted with CH<sub>2</sub>Cl<sub>2</sub> and separated organic layer was dried over Na<sub>2</sub>SO<sub>4</sub>. After filtration and concentration, the crude product was directly used for next reaction.

The crude product was dissolved in CH<sub>2</sub>Cl<sub>2</sub> (10 mL) and cooled to 0 °C. To the mixture was added NaHCO<sub>3</sub> (420 mg, 5.0 mmol) and mCPBA (552 mg, 3.2 mmol) and the reaction mixture was stirred at rt for 2 h. The reaction mixture was diluted with CH<sub>2</sub>Cl<sub>2</sub> and washed with sat. aq. NaHCO<sub>3</sub> and water. The combined organic layer was dried over Na<sub>2</sub>SO<sub>4</sub> and filtered. The solvent was concentrated and the crude product was directly used for next reaction.

The crude product was dissolved in THF (10 mL) and H<sub>2</sub>O (1 mL) and TsOH·H<sub>2</sub>O (37.6 mg, 0.2 mmol) was added to the mixture. Then the mixture was stirred for 9 h under reflux condition and the reaction was quenched with sat. aq. NaHCO<sub>3</sub>. The mixture was extracted with EtOAc and dried over Na<sub>2</sub>SO<sub>4</sub>. After filtration and concentration, the resulting residue was purified by silicagel C.C. (hexane:AcOEt = 5:1→2:1) to afford **9** (290.9 mg, 69% in 3 steps).

IR (ATR): 3457, 2980, 2943, 2174, 2141, 1722, 1703, 1688, 1630, 1592, 1546, 1500, 1459, 1422, 1391, 1325, 1279, 1217, 1201, 1151, 1116, 1092, 999, 959, 938, 810 cm<sup>-1</sup>.

<sup>1</sup>H-NMR (400 MHz, CDCl<sub>3</sub>): δ 13.20 (s, 1H), 6.08 (d, *J* = 2.2 Hz, 1H), 5.91 (d, *J* = 2.2 Hz, 1H),

4.69 (s, 2H), 3.85 (s, 3H), 3.81 (s, 3H), 3.00 (brs, 1H).

$^{13}\text{C}$ -NMR (100 MHz,  $\text{CDCl}_3$ ):  $\delta$  201.9, 167.2, 167.1, 163.1, 103.3, 93.7, 90.9, 68.6, 55.7, 55.7.

ESI-HRMS  $[\text{M}+\text{Na}]^+$ : calcd for  $\text{C}_{10}\text{H}_{12}\text{NaO}_5$  235.0582, found 235.0590.

### 3-(benzyloxy)-4-methoxybenzoic acid (**10**)

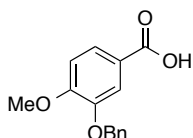

To a solution of 3-hydroxy-4-methoxybenzoic acid (1.0 g, 6.0 mmol) in MeOH (11 mL) was added  $\text{H}_2\text{SO}_4$  (36  $\mu\text{L}$ , 0.36 mmol) and the reaction mixture was stirred for 18 h under reflux condition. The reaction mixture was cooled to rt and concentrated *in vacuo*. The resulting mixture was diluted with sat. aq.  $\text{NaHCO}_3$  and extracted with EtOAc. The organic layer was dried over  $\text{Na}_2\text{SO}_4$  and concentrated, and the residue was purified by silicagel flash C.C. (hexane:AcOEt = 5:1) to give methyl 3-hydroxy-4-methoxybenzoate (1.04 g, 95% yield).

$^1\text{H}$ -NMR (400 MHz,  $\text{CDCl}_3$ ):  $\delta$  7.62 (dd,  $J$  = 8.4, 2.0 Hz, 1H), 7.59 (d,  $J$  = 2.0 Hz, 1H), 6.87 (d,  $J$  = 8.4 Hz, 1H), 5.66 (s, 1H), 3.94 (s, 3H), 3.88 (s, 3H).

$^{13}\text{C}$ -NMR (100 MHz,  $\text{CDCl}_3$ ):  $\delta$  166.8, 150.4, 145.2, 123.4, 122.8, 115.6, 109.8, 56.0, 51.9.

ESI-HRMS  $[\text{M}-\text{H}]^-$ : calcd for  $\text{C}_9\text{H}_9\text{O}_4$  181.0501, found 181.0527.

To a solution of methyl 3-hydroxy-4-methoxybenzoate (1.02 g, 5.6 mmol) in MeOH was added DBU (1.3 mL, 8.4 mmol) and benzyl bromide (736  $\mu\text{L}$ , 6.2 mmol) and then the reaction mixture was stirred for 20 h under reflux condition. After removal of solvent, the resulting residue was diluted with water and extracted with EtOAc. The organic layer was washed with brine and dried over  $\text{Na}_2\text{SO}_4$ . After filtration and concentration, the residue was purified by crystallization to give methyl 3-(benzyloxy)-4-methoxybenzoate (1.21 g, 79% yield).

IR (ATR): 2942, 2184, 1962, 1707, 1584, 1509, 1436, 1384, 1341, 1293, 1261, 1207, 1176, 1127, 1006, 873, 847  $\text{cm}^{-1}$ .

$^1\text{H}$ -NMR (400 MHz,  $\text{CDCl}_3$ ):  $\delta$  7.68 (dd,  $J$  = 8.6, 2.0 Hz, 1H), 7.61 (d,  $J$  = 2.0 Hz, 1H), 7.48-7.30 (m, 5H), 6.90 (d,  $J$  = 8.6 Hz, 1H), 5.17 (s, 2H), 3.93 (s, 3H), 3.87 (s, 3H).

$^{13}\text{C}$ -NMR (100 MHz,  $\text{CDCl}_3$ ):  $\delta$  166.8, 153.6, 147.7, 136.6, 128.6, 128.0, 127.5, 124.0, 122.5, 114.4, 110.7, 71.0, 56.0, 51.9.

ESI-HRMS  $[\text{M}+\text{Na}]^+$ : calcd for  $\text{C}_{16}\text{H}_{16}\text{NaO}_4$  295.0946, found 295.0871.

To a solution of 3-(benzyloxy)-4-methoxybenzoate (844 mg, 3.1 mmol) in THF (3.4 mL) was

added 1N NaOH (8.4 mL) and stirred for 3 h under reflux condition. The reaction was quenched with 1N HCl and the mixture was extracted with EtOAc. The combined organic layer was washed with brine and dried over Na<sub>2</sub>SO<sub>4</sub>. Filtration and concentration afforded **10** (800 mg, 98%).

IR (ATR): 2957, 2039, 1681, 1599, 1517, 1438, 1348, 1301, 1269, 1224, 1135, 1021 cm<sup>-1</sup>.

<sup>1</sup>H-NMR (400 MHz, CDCl<sub>3</sub>): δ 7.77 (dd, *J* = 8.4, 2.2 Hz, 1H), 7.65 (d, *J* = 2.2 Hz, 1H), 7.48-7.30 (m, 5H), 6.93 (d, *J* = 8.4 Hz, 1H), 5.19 (s, 2H), 3.95 (s, 3H).

<sup>13</sup>C-NMR (100 MHz, CDCl<sub>3</sub>): δ 171.2, 154.3, 147.8, 136.5, 128.6, 128.1, 127.5, 124.9, 121.6, 114.7, 110.7, 71.0, 56.1.

ESI-HRMS [M+Na]<sup>+</sup>: calcd for C<sub>15</sub>H<sub>14</sub>NaO<sub>4</sub> 281.0790, found 281.0793.

## Compound **11**, **16a-d**

### *General procedure*

To a solution of **9** (300 mg, 1.4 mmol) in CH<sub>2</sub>Cl<sub>2</sub> (14 mL) was added **15a** (538 mg, 4.2 mmol), DMAP (59 mg, 0.48 mmol) and EDC·HCl (1.2 g, 6.3 mmol). The reaction mixture was stirred at rt for 8 h and then diluted with water. The mixture was extracted with CH<sub>2</sub>Cl<sub>2</sub> and the organic layer was dried over Na<sub>2</sub>SO<sub>4</sub>. After filtration and concentration, the resulting residue was purified by silicagel chromatography (hexane:AcOEt = 3:1) to afford **16a** (605 mg, 1.4 mmol, quant.).

2-(2-((3-(benzyloxy)-4-methoxybenzoyl)oxy)-4,6-dimethoxyphenyl)-2-oxoethyl 3-(benzyloxy)-4-methoxybenzoate (**11**); 90%

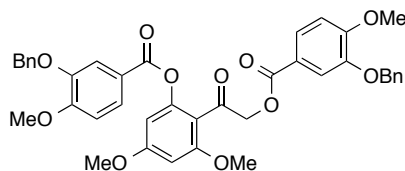

IR (ATR): 2936, 2840, 1718, 1600, 1512, 1455, 1420, 1344, 1290, 1265, 1201, 1175, 1130, 1098, 1019 cm<sup>-1</sup>.

<sup>1</sup>H-NMR (400 MHz, CDCl<sub>3</sub>): δ 7.79 (dd, *J* = 8.4, 2.0 Hz, 1H), 7.71 (d, *J* = 2.0 Hz, 1H), 7.63 (dd, *J* = 8.4, 2.0 Hz, 1H), 7.54 (d, *J* = 2.0 Hz, 1H), 7.44-7.25 (m, 10H), 6.89 (d, *J* = 8.4 Hz, 1H), 6.80 (d, *J* = 8.4 Hz, 1H), 6.43 (d, *J* = 2.0 Hz, 1H), 6.36 (d, *J* = 2.0 Hz, 1H), 5.20 (s, 2H), 5.14 (s, 2H), 5.02 (s, 2H), 3.88 (s, 3H), 3.86 (s, 3H), 3.81 (s, 3H), 3.78 (s, 3H).

$^{13}\text{C}$ -NMR (100 MHz  $\text{CDCl}_3$ ):  $\delta$  194.1, 165.5, 164.6, 162.9, 159.7, 154.1, 153.7, 151.2, 147.8, 147.6, 136.5, 136.5, 128.5, 127.9, 127.6, 125.1, 124.3, 122.0, 121.4, 114.8, 114.4, 113.5, 110.7, 110.6, 100.8, 96.3, 70.9, 70.8, 69.4, 56.0, 56.0, 55.9, 55.7.

ESI-HRMS  $[\text{M}+\text{Na}]^+$  : calcd for  $\text{C}_{40}\text{H}_{36}\text{NaO}_{11}$  715.2155, found 715.2067.

3,5-dimethoxy-2-(2-((thiophene-2-carbonyl)oxy)acetyl)phenyl thiophene-2-carboxylate (**16a**);  
quant.

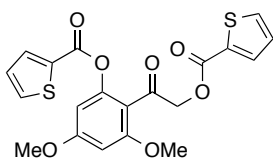

IR (ATR): 3102, 2943, 2841, 1717, 1608, 1573, 1522, 1457, 1412, 1360, 1332, 1248, 1220, 1197, 1152, 1094, 1053, 1022  $\text{cm}^{-1}$ .

$^1\text{H}$ -NMR (400 MHz,  $\text{CDCl}_3$ ):  $\delta$  7.93 (dd,  $J = 3.9, 1.5$  Hz, 1H), 7.77 (dd,  $J = 3.7, 1.1$  Hz, 1H), 7.61 (dd,  $J = 5.0, 1.5$  Hz, 1H), 7.52 (dd,  $J = 4.8, 1.1$  Hz, 1H), 7.12 (dd,  $J = 5.0, 3.9$  Hz, 1H), 7.05 (dd,  $J = 4.8, 3.7$  Hz, 1H), 6.43 (d,  $J = 2.2$  Hz, 1H), 6.38 (d,  $J = 2.2$  Hz, 1H), 5.22 (s, 2H), 3.84 (s, 3H), 3.82 (s, 3H).

$^{13}\text{C}$ -NMR (100 MHz,  $\text{CDCl}_3$ ):  $\delta$  193.2, 163.1, 161.4, 160.2, 159.9, 150.8, 135.1, 133.9, 133.7, 133.1, 132.7, 132.3, 128.0, 127.7, 113.2, 100.9, 96.6, 69.5, 56.0, 55.7.

ESI-HRMS  $[\text{M}+\text{Na}]^+$  : calcd for  $\text{C}_{20}\text{H}_{16}\text{NaO}_7\text{S}_2$  455.0235, found 455.0203.

2-(2-((furan-2-carbonyl)oxy)-4,6-dimethoxyphenyl)-2-oxoethyl furan-2-carboxylate (**16b**);  
quant.

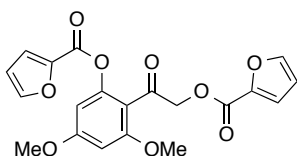

IR (ATR): 3141, 2944, 2851, 1734, 1609, 1566, 1470, 1421, 1391, 1361, 1334, 1295, 1228, 1173, 1105, 1013  $\text{cm}^{-1}$ .

$^1\text{H}$ -NMR (400 MHz,  $\text{CDCl}_3$ ):  $\delta$  7.62 (dd,  $J = 2.0, 0.8$  Hz, 1H), 7.55 (dd,  $J = 1.6, 0.8$  Hz, 1H), 7.35 (dd,  $J = 3.6, 0.8$  Hz, 1H), 7.18 (dd,  $J = 3.6, 0.8$  Hz, 1H), 6.53 (dd,  $J = 3.6, 1.6$  Hz, 1H), 6.47 (dd,  $J = 3.6, 2.0$  Hz, 1H), 6.41 (d,  $J = 2.4$  Hz, 1H), 6.38 (d,  $J = 2.4$  Hz, 1H), 5.26 (s, 2H), 3.85 (s, 3H), 3.82 (s, 3H).

$^{13}\text{C}$ -NMR (100 MHz,  $\text{CDCl}_3$ ):  $\delta$  192.5, 163.3, 160.1, 157.8, 156.5, 150.6, 147.3, 146.5, 144.1,

143.5, 120.1, 118.6, 112.9, 112.2, 111.9, 101.0, 96.7, 69.3, 56.1, 55.8.

ESI-HRMS  $[M+Na]^+$ : calcd for  $C_{20}H_{16}NaO_9$  423.0692, found 423.0673.

2-(2-((5-bromothiophene-2-carbonyl)oxy)-4,6-dimethoxyphenyl)-2-oxoethyl  
5-bromothiophene-2-carboxylate (**16c**); 91%

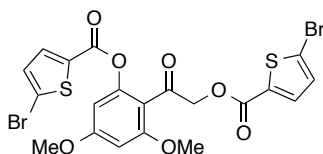

IR (ATR): 1732, 1608, 1415, 1227, 1100  $cm^{-1}$ .

$^1H$ -NMR (400 MHz,  $CDCl_3$ ):  $\delta$  7.67 (d,  $J = 3.9$  Hz, 1H), 7.53 (d,  $J = 3.9$  Hz, 1H), 7.09 (d,  $J = 3.9$  Hz, 1H), 7.04 (d,  $J = 3.9$  Hz, 1H), 6.40 (d,  $J = 2.3$  Hz, 1H), 6.38 (d,  $J = 2.3$  Hz, 1H), 5.18 (s, 2H), 3.86 (s, 3H), 3.82 (s, 3H).

$^{13}C$ -NMR (100 MHz,  $CDCl_3$ ):  $\delta$  192.5, 163.3, 160.3, 160.0, 159.2, 150.7, 135.3, 134.2, 134.1, 133.4, 131.1, 130.9, 121.8, 120.7, 112.9, 101.1, 96.7, 69.7, 56.1, 55.8.

ESI-MS  $[M+Na]^+$ : calcd for  $C_{20}H_{14}^{79}Br^{81}BrO_7S_2$  612.8425, found 612.8486.  $C_{20}H_{14}^{79}Br_2O_7S_2$  610.8445, found 610.8394.  $C_{20}H_{14}^{81}Br_2O_7S_2$  614.8405 found 614.8307.

2-(2-((5-bromofuran-2-carbonyl)oxy)-4,6-dimethoxyphenyl)-2-oxoethyl 5-bromofuran-2-carboxylate (**16d**); 95%.

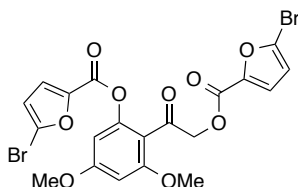

IR (ATR): 3154, 2943, 2845, 1731, 1682, 1608, 1567, 1459, 1421, 1358, 1332, 1286, 1228, 1206, 1142, 1106, 1015  $cm^{-1}$ .

$^1H$ -NMR (400 MHz,  $CDCl_3$ ):  $\delta$  7.27 (d,  $J = 3.7$  Hz, 1H), 7.12 (d,  $J = 3.7$  Hz, 1H), 6.48 (d,  $J = 3.3$  Hz, 1H), 6.42 (d,  $J = 3.3$  Hz, 1H), 6.39 (s, 2H), 5.24 (s, 2H), 3.86 (s, 3H), 3.81 (s, 3H).

$^{13}C$ -NMR (100 MHz,  $CDCl_3$ ):  $\delta$  192.0, 163.4, 160.2, 156.7, 155.3, 150.5, 145.7, 145.2, 128.8, 127.8, 122.2, 120.8, 114.3, 114.0, 112.6, 101.1, 96.7, 69.4, 56.1, 55.8.

ESI-HRMS  $[M+Na]^+$ : calcd for  $C_{20}H_{14}^{79}Br^{81}BrNaO_9$  582.8882, found 582.8861.  $C_{20}H_{14}^{79}Br_2NaO_9$  578.8902, found 578.8956.  $C_{20}H_{14}^{81}Br_2NaO_9$  582.8861, found 582.8852.

Compound **12**, **17a-d**

### General procedure

To a solution of **16a** (578 mg, 1.3 mmol) in THF (38 mL) was added of LHMDS (1.3 M, 3.1 mL, 4.0 mmol) at -20°C in dropwise manner. The reaction mixture was stirred for 2 h and the reaction was quenched using sat. aq. NaHCO<sub>3</sub>. The resulting mixture was extracted using EtOAc. The combined organic layers were then washed with brine, dried over Na<sub>2</sub>SO<sub>4</sub> and filtered. The solvent was evaporated *in vacuo* and the resulting residue was purified by silicagel chromatography (hexane:AcOEt = 3:1) to afford **17a** (432 mg, 1.0 mmol, 75 %).

1-(3-(benzyloxy)-4-methoxyphenyl)-3-(2-hydroxy-4,6-dimethoxyphenyl)-1,3-dioxopropan-2-yl 3-(benzyloxy)-4-methoxybenzoate (**12**) (used to next step without purification.)

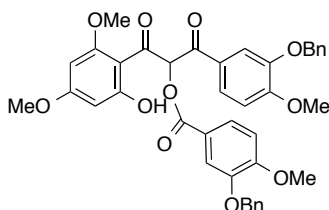

IR (ATR): 2945, 1718, 1681, 1598, 1513, 1426, 1270, 1216, 1159, 1114, 1020 cm<sup>-1</sup>.

<sup>1</sup>H-NMR (400 MHz, CDCl<sub>3</sub>): δ 13.26 (s, 1H), 7.76 (d, *J* = 2.0 Hz, 1H), 7.74 (d, *J* = 1.6 Hz, 1H), 7.64-7.59 (m, 2H), 7.43-7.20 (m, 11H), 6.91 (d, *J* = 8.0 Hz, 1H), 6.87 (d, *J* = 8.4 Hz, 1H), 6.08 (d, *J* = 2.0 Hz, 1H), 5.76 (d, *J* = 2.0 Hz, 1H), 5.21-5.09 (m, 4H), 3.94 (s, 3H), 3.90 (s, 3H), 3.79 (s, 3H), 3.15 (s, 3H).

<sup>13</sup>C-NMR (100 MHz CDCl<sub>3</sub>): δ 194.3, 189.8, 167.7, 166.9, 165.1, 161.5, 154.4, 154.3, 148.0, 147.8, 136.5, 136.3, 128.6, 128.5, 128.1, 128.0, 127.7, 127.6, 127.5, 124.9, 123.8, 121.1, 114.8, 113.0, 110.8, 104.4, 94.1, 91.0, 71.0, 70.7, 56.1, 56.1, 55.7, 55.1.

ESI-HRMS [M+Na]<sup>+</sup>: calcd for C<sub>40</sub>H<sub>36</sub>NaO<sub>11</sub> 715.2155, found 715.2067.

1-(2-hydroxy-4,6-dimethoxyphenyl)-1,3-dioxo-3-(thiophen-2-yl)propan-2-yl thiophene-2-carboxylate (**17a**); 85%.

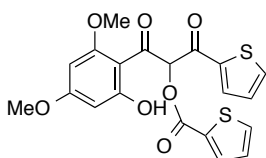

IR (ATR): 3103, 2943, 1715, 1671, 1624, 1577, 1521, 1463, 1414, 1359, 1274, 1244, 1217, 1159, 1114, 1091, 861, 821 cm<sup>-1</sup>.

<sup>1</sup>H-NMR (400 MHz, CDCl<sub>3</sub>): δ 13.17 (s, 1H), 7.91 (d, *J* = 4.4 Hz, 1H), 7.83 (d, *J* = 4.2 Hz, 1H),

7.72 (d,  $J = 5.3$  Hz, 1H), 7.61 (d,  $J = 5.3$  Hz, 1H), 7.21 (s, 1H), 7.17 (dd,  $J = 5.3, 4.4$  Hz, 1H), 7.11 (dd,  $J = 5.3, 4.2$  Hz, 1H), 6.09 (d,  $J = 2.4$  Hz, 1H), 5.83 (d,  $J = 2.4$  Hz, 1H), 3.80 (s, 3H), 3.41 (s, 3H).

$^{13}\text{C-NMR}$  (100 MHz,  $\text{CDCl}_3$ ):  $\delta$  192.9, 183.7, 167.7, 167.1, 161.5, 160.9, 141.7, 134.9, 133.8, 133.4, 131.9, 128.5, 128.0, 104.4, 94.1, 91.0, 78.1, 55.7, 55.2.

ESI-HRMS  $[\text{M}+\text{Na}]^+$ : calcd for  $\text{C}_{20}\text{H}_{16}\text{NaO}_7\text{S}_2$  455.0235, found 455.0196.

1-(furan-2-yl)-3-(2-hydroxy-4,6-dimethoxyphenyl)-1,3-dioxopropan-2-yl furan-2-carboxylate (**17b**); 70%.

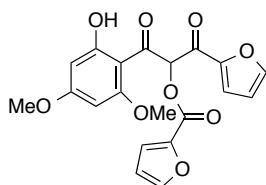

IR (ATR): 3136, 2945, 1728, 1682, 1609, 1567, 1463, 1438, 1420, 1392, 1347, 1296, 1275, 1248, 1215, 1158, 1105, 1048, 1011  $\text{cm}^{-1}$ .

$^1\text{H-NMR}$  (400 MHz,  $\text{CDCl}_3$ ):  $\delta$  13.15 (s, 1H), 7.64 (dd,  $J = 1.8, 0.7$  Hz, 1H), 7.61 (dd,  $J = 1.8, 0.9$ , 1H), 7.36 (dd,  $J = 3.7, 0.7$  Hz, 1H), 7.29 (dd, 3.7, 0.9 Hz, 1H), 7.19 (s, 1H), 6.60 (dd, 3.7, 1.8 Hz, 1H), 6.51 (dd, 3.7, 1.8 Hz, 1H), 6.09 (d,  $J = 2.6$  Hz, 1H), 5.82 (d,  $J = 2.6$  Hz, 1H), 3.80 (s, 3H), 3.43 (s, 3H).

$^{13}\text{C-NMR}$  (100 MHz,  $\text{CDCl}_3$ ):  $\delta$  192.7, 179.4, 167.8, 167.2, 161.5, 157.2, 150.9, 147.24, 147.21, 143.3, 119.7, 118.9, 112.8, 112.1, 104.3, 94.1, 91.0, 55.7, 55.3.

ESI-HRMS  $[\text{M}+\text{Na}]^+$ : calcd for  $\text{C}_{20}\text{H}_{16}\text{NaO}_9$  423.0692, found 423.0672.

1-(5-bromothiophen-2-yl)-3-(2-hydroxy-4,6-dimethoxyphenyl)-1,3-dioxopropan-2-yl 5-bromothiophene-2-carboxylate (**17c**); 86%

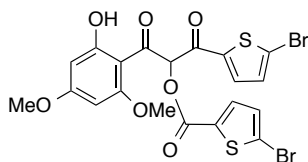

IR (ATR) : 2925, 1720, 1671, 1631, 1412, 1330, 1238, 1217, 1160, 1115, 1090, 896  $\text{cm}^{-1}$ .

$^1\text{H-NMR}$  (400 MHz,  $\text{CDCl}_3$ ):  $\delta$  13.1 (s, 1H), 7.65 (d,  $J = 3.9$  Hz, 1H), 7.55 (d,  $J = 3.9$  Hz, 1H), 7.14 (d,  $J = 4.2$  Hz, 1H), 7.08 (d,  $J = 4.2$  Hz, 1H), 7.08 (s, 1H), 6.08 (d,  $J = 2.3$  Hz, 1H), 5.83 (d,  $J = 2.3$  Hz, 1H), 3.79 (s, 3H), 3.47 (s, 3H).



$^{13}\text{C}$ -NMR (100 MHz,  $\text{CDCl}_3$ ):  $\delta$  192.2, 182.4, 167.8, 167.3, 161.4, 159.7, 142.9, 135.3, 133.6, 132.8, 131.2, 131.2, 124.2, 122.1, 104.3, 94.2, 91.2, 77.7, 55.8, 55.3.

ESI-MS  $[\text{M}+\text{Na}]^+$ : calcd for  $\text{C}_{20}\text{H}_{14}^{79}\text{Br}^{81}\text{BrNaO}_7\text{S}_2$  612.8425, found 612.8362.  $\text{C}_{20}\text{H}_{14}^{79}\text{Br}_2\text{NaO}_7\text{S}_2$  610.8445, found 610.8397.  $\text{C}_{20}\text{H}_{14}^{81}\text{Br}_2\text{NaO}_7\text{S}_2$  614.8405, found 614.8322.

1-(5-bromofuran-2-yl)-3-(2-hydroxy-4,6-dimethoxyphenyl)-1,3-dioxopropan-2-yl-5-bromofuran-2-carboxylate (**17d**); 65%.

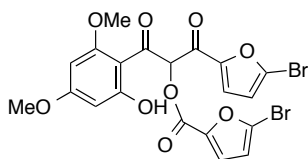

IR (ATR): 3146, 2924, 2850, 2159, 1730, 1683, 1613, 1578, 1451, 1421, 1359, 1275, 1248, 1214, 1159  $\text{cm}^{-1}$ .

$^1\text{H}$ -NMR (400 MHz,  $\text{CDCl}_3$ ):  $\delta$  13.06 (s, 1H), 7.29 (d,  $J = 4.0$  Hz, 1H), 7.23 (d,  $J = 3.5$  Hz, 1H), 7.08 (s, 1H), 6.56 (d,  $J = 4.0$  Hz, 1H), 6.47 (d,  $J = 3.5$  Hz, 1H), 6.08 (d,  $J = 2.2$  Hz, 1H), 5.83 (d,  $J = 2.2$  Hz, 1H), 3.79 (s, 3H), 3.50 (s, 3H).

$^{13}\text{C}$ -NMR (100 MHz,  $\text{CDCl}_3$ ):  $\delta$  192.0, 177.8, 167.8, 167.3, 161.4, 156.0, 152.3, 144.8, 129.6, 128.9, 121.9, 121.1, 115.0, 114.2, 104.2, 94.1, 91.1, 76.9, 55.7, 55.4.

ESI-HRMS  $[\text{M}+\text{Na}]^+$ : calcd for  $\text{C}_{20}\text{H}_{14}^{79}\text{Br}^{81}\text{BrNaO}_9$  580.8882, found 580.8869.  $\text{C}_{20}\text{H}_{14}^{79}\text{Br}_2\text{NaO}_9$  578.8902, found 578.8945.  $\text{C}_{20}\text{H}_{14}^{81}\text{Br}_2\text{NaO}_9$  582.8861, found 582.8855.

## Compound **13**, **19a-d**

### **General procedure**

To a solution of **17a** (404 mg, 0.93 mmol) in 12 mL of glacial acetic acid was added 246  $\mu\text{L}$  of sulfuric acid. The resulting mixture was stirred at rt for 22 h. The reaction was quenched with cool water and filtered. Then resulting residue was added EtOH and stirred for a few hours under reflux condition. The reaction mixture was concentrated and resulting crude product **18a** (307 mg) was used for next reaction without further purification.

To a solution of crude product **18a** (307 mg) in EtOH (3.7 mL) was added 1N NaOH (890  $\mu\text{L}$ ). The reaction mixture was heated at 80  $^\circ\text{C}$  and stirred for 5 h. The reaction was quenched with 1N HCl and filtered by Kiriya funnel. The residue was washed with cooled EtOH and the solvent was evaporated *in vacuo* to afford **19a** (149 mg, 0.5 mmol, 66% from **17a**).

2-(3-(benzyloxy)-4-methoxyphenyl)-3-hydroxy-5,7-dimethoxy-4*H*-chromen-4-one (**13**); 75% in 3 steps from **11**.

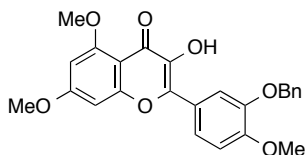

IR (ATR): 2938, 1615, 1514, 1496, 1456, 1437, 1335, 1259, 1213, 1160, 1020  $\text{cm}^{-1}$ .

$^1\text{H-NMR}$  (400 MHz,  $\text{CDCl}_3$ ):  $\delta$  7.83 (d,  $J = 2.0$  Hz, 1H), 7.80 (dd,  $J = 8.4, 2.0$  Hz, 1H), 7.51-7.49 (m, 2H), 7.39-7.28 (m, 3H), 6.99 (d,  $J = 8.4$  Hz, 1H), 6.46 (d,  $J = 2.0$  Hz, 1H), 6.32 (d,  $J = 2.0$  Hz, 1H), 5.23 (s, 2H), 3.95 (s, 3H), 3.94 (s, 3H), 3.90 (s, 3H).

$^{13}\text{C-NMR}$  (100 MHz  $\text{CDCl}_3$ ):  $\delta$  171.9, 164.3, 160.5, 158.8, 150.9, 147.9, 142.0, 137.5, 136.9, 128.5, 128.0, 127.6, 123.6, 121.2, 113.0, 111.4, 106.2, 95.6, 92.3, 71.3, 56.4, 56.0, 55.8.

ESI-HRMS  $[\text{M}+\text{H}]^+$ : calcd for  $\text{C}_{15}\text{H}_{23}\text{O}_7$  435.1444, found 435.1440.

3-hydroxy-2-(3-hydroxy-4-methoxyphenyl)-5,7-dimethoxy-4*H*-chromen-4-one (**14**)

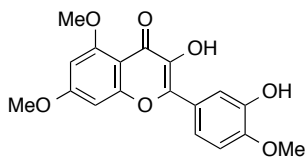

To a solution of **13** (30 mg, 0.069 mmol) in THF (950  $\mu\text{L}$ ) and EtOH (950  $\mu\text{L}$ ) was added  $\text{Pd}(\text{OH})_2$  on activated carbon (3 mg). Under balloon pressure of hydrogen, the reaction mixture was stirred for 2 h. The reaction mixture was filtered through a celite and the solvent was removed *in vacuo* to afford a yellow-white solid **14** (23.8 mg, quant.).

IR (ATR): 3422, 3242, 2952, 2882, 1722, 1614, 1512, 1437, 1334, 1250, 1210, 1159, 1034  $\text{cm}^{-1}$ .

$^1\text{H-NMR}$  (400 MHz,  $\text{CDCl}_3$ ):  $\delta$  7.84 (dd,  $J = 8.8, 2.0$  Hz, 1H), 7.78 (d,  $J = 2.0$  Hz, 1H), 6.98 (d,  $J = 8.8$  Hz, 1H), 6.56 (d,  $J = 2.4$  Hz, 1H), 6.35 (d,  $J = 2.4$  Hz, 1H), 5.69 (brs, 1H), 3.98 (s, 3H), 3.98 (s, 3H), 3.92 (s, 3H).

$^{13}\text{C-NMR}$  (100 MHz,  $\text{CDCl}_3$ ):  $\delta$  171.9, 164.4, 160.5, 158.9, 147.7, 145.6, 141.9, 137.7, 124.4, 120.5, 113.1, 110.5, 106.2, 95.7, 92.4, 56.4, 56.0, 55.8.

ESI-HRMS  $[\text{M}+\text{H}]^+$ : calcd for  $\text{C}_{18}\text{H}_{17}\text{O}_7$  345.0974, found 345.0943.

3-hydroxy-5,7-dimethoxy-2-(thiophen-2-yl)-4*H*-chromen-4-one (**19a**); 66%.

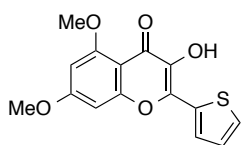

IR (ATR): 1614, 1557, 1436, 1370, 1325, 1237, 1213, 1158, 1107, 1032, 808  $\text{cm}^{-1}$ .

$^1\text{H-NMR}$  (400 MHz,  $\text{CDCl}_3$ ):  $\delta$  7.91 (d,  $J = 4.0$  Hz, 1H), 7.56 (d,  $J = 5.2$  Hz, 1H), 7.21 (dd,  $J = 5.2, 4.0$  Hz, 1H), 6.54 (d,  $J = 2.0$  Hz, 1H), 6.35 (d,  $J = 2.0$  Hz, 1H), 3.97 (s, 3H), 3.92 (s, 3H).

$^{13}\text{C-NMR}$  (100 MHz,  $\text{CDCl}_3$ ):  $\delta$  171.3, 164.4, 160.6, 158.7, 140.0, 136.6, 133.0, 128.7, 128.2, 128.0, 106.4, 95.8, 92.5, 56.4, 55.8.

ESI-HRMS  $[\text{M}+\text{Na}]^+$ : calcd for  $\text{C}_{15}\text{H}_{12}\text{NaO}_5\text{S}$  327.0303, found 327.0301.

2-(furan-2-yl)-3-hydroxy-5,7-dimethoxy-4H-chromen-4-one (**19b**); 92%.

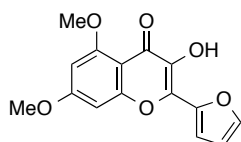

IR (ATR): 3296, 2922, 2850, 1602, 1568, 1490, 1456, 1435, 1363, 1306, 1267, 1240, 1214, 1157, 1133, 1106, 1076, 1055, 997, 977, 938, 915, 885, 846, 820  $\text{cm}^{-1}$ .

$^1\text{H-NMR}$  (400 MHz,  $\text{CDCl}_3$ ):  $\delta$  7.65 (dd,  $J = 1.8, 0.9$  Hz, 1H), 7.23 (dd,  $J = 3.7, 0.9$  Hz, 1H), 6.62 (dd,  $J = 3.7, 1.8$  Hz, 1H), 6.58 (d,  $J = 2.2$  Hz, 1H), 6.35 (d,  $J = 2.2$  Hz, 1H), 3.95 (s, 3H), 3.89 (s, 3H).

$^{13}\text{C-NMR}$  (100 MHz,  $\text{CDCl}_3$ ):  $\delta$  171.2, 164.4, 160.6, 158.6, 144.3, 144.1, 136.3, 135.9, 114.1, 112.5, 106.5, 95.9, 92.6, 56.4, 55.8.

ESI-HRMS  $[\text{M}+\text{Na}]^+$ : calcd for  $\text{C}_{15}\text{H}_{12}\text{NaO}_6$  311.0532, found 311.0512.

2-(5-bromothiophen-2-yl)-3-hydroxy-5,7-dimethoxy-4H-chromen-4-one (**19c**); 55%

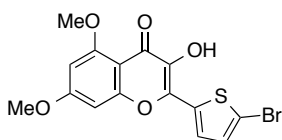

IR (ATR) : 2921, 1608, 1439, 1232, 1159, 1130, 1053  $\text{cm}^{-1}$ .

$^1\text{H-NMR}$  (400 MHz,  $\text{CDCl}_3$ ):  $\delta$  7.60 (d,  $J = 3.9$  Hz, 1H), 7.14 (d,  $J = 3.9$  Hz, 1H), 6.50 (d,  $J = 2.3$  Hz, 1H), 6.34 (d,  $J = 2.3$  Hz, 1H), 3.96 (s, 3H), 3.90 (s, 3H).

$^{13}\text{C-NMR}$  (150 MHz,  $\text{CDCl}_3$ ) :  $\delta$  171.2, 164.6, 160.6, 158.6, 138.5, 136.1, 134.2, 130.8, 128.1, 116.8, 106.4, 95.9, 92.5, 56.5, 55.9, 53.4.

ESI-MS  $[\text{M}+\text{Na}]^+$  : calcd for  $\text{C}_{15}\text{H}_{11}^{79}\text{BrNaO}_5\text{S}$  404.9408, found 404.9445.  $\text{C}_{15}\text{H}_{11}^{81}\text{BrNaO}_5\text{S}$

406.9388, found 406.9372.

2-(5-bromofuran-2-yl)-3-hydroxy-5,7-dimethoxy-4*H*-chromen-4-one (**19d**); 55%.

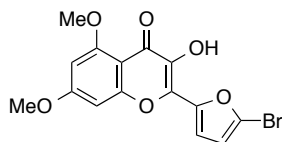

IR (ATR): 3414, 1616, 1489, 1455, 1244, 1217, 1163, 1128, 1008, 923, 815  $\text{cm}^{-1}$ .

$^1\text{H-NMR}$  (400 MHz,  $\text{CDCl}_3$ ):  $\delta$  7.14 (brs, 1H), 7.14 (d,  $J = 3.5$  Hz, 1H), 6.59 (d,  $J = 2.2$  Hz, 1H), 6.52 (d,  $J = 3.5$  Hz, 1H), 6.34 (d,  $J = 2.2$  Hz, 1H), 3.95 (s, 3H), 3.89 (s, 3H).

$^{13}\text{C-NMR}$  (100 MHz,  $\text{CDCl}_3$ ):  $\delta$  171.0, 164.5, 160.5, 158.6, 146.0, 136.1, 134.8, 124.7, 116.4, 114.4, 106.5, 96.0, 92.6, 56.4, 55.9.

ESI-HRMS  $[\text{M}+\text{H}]^+$ :  $\text{C}_{15}\text{H}_{12}^{81}\text{BrO}_6$  calcd 368.9797, found for 368.9747.

## Compound 5, **22a-d**

### **General procedure**

To solution of 3-hydroxychromone (**19a**; 91 mg, 0.30 mmol) in dry acetonitrile (4.7 mL) and dry MeOH (3.2 mL) was added methyl cinnamate (610  $\mu\text{L}$ , 3.9 mmol). The reaction mixture was irradiated (400 W mercury lamp) at 0  $^\circ\text{C}$  for 2 h. The solvent was removed *in vacuo* and the resulting residue was purified by silicagel column chromatography (hexane:AcOEt = 10:1 $\rightarrow$ 2:1 $\rightarrow$ 1:1) to afford a mixture containing **20a** (95.7 mg).

To a mixture containing **20a** (95.7 mg) in dry MeOH (7 mL) was added NaOMe (31 mg, 0.57 mmol). The reaction mixture was stirred for 2 h under reflux condition. The reaction was quenched with sat. aq.  $\text{NH}_4\text{Cl}$  and the mixture was extracted with EtOAc. The combined organic layer was washed with brine and dried over  $\text{Na}_2\text{SO}_4$ . After filtration and concentration, the resulting residue was purified by silicagel column chromatography (hexane:AcOEt = 2:1) to afford inseparable keto-enol isomers of **21a** (55.9 mg, 0.12 mmol, 53% in 2 steps from **19a**).

A mixture of tetramethylammonium triacetoxyborohydride (189 mg, 0.72 mmol) and acetic acid (70  $\mu\text{L}$ , 1.2 mmol) in dry acetonitrile (3.1 mL) was stirred at rt for 5 min. The mixture was added to a solution of keto-enol tautomers **21a** (55.9 mg, 0.12 mmol) in dry acetonitrile (2.1 mL) and the mixture was stirred at rt for 2 h. The reaction was quenched with sat. aq.  $\text{NH}_4\text{Cl}$  and the mixture was extracted with  $\text{CH}_2\text{Cl}_2$ . The combined organic layer was washed with brine and dried over  $\text{Na}_2\text{SO}_4$ . After filtration and concentration, the resulting residue was purified by silicagel column chromatography (hexane:AcOEt = 3:2) to afford **22a** (45.9 mg, 0.098 mmol,

82%).

methyl (1*R*\*,2*R*\*,3*S*\*,3*aR*\*,8*bS*\*)-1,8b-dihydroxy-3a-(3-hydroxy-4-methoxyphenyl)-6,8-dimethoxy-3-phenyl-2,3,3a,8b-tetrahydro-1*H*-cyclopenta[*b*]benzofuran-2-carboxylate (**5**); 35% in 3 steps.

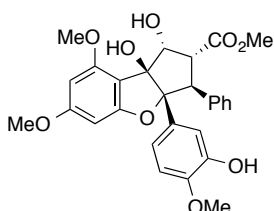

IR (ATR): 3490, 2951, 2842, 1740, 1622, 1597, 1512, 1499, 1454, 1437, 1340, 1266, 1216, 1200, 1146, 1120, 1059, 1030  $\text{cm}^{-1}$ .

$^1\text{H-NMR}$  (400 MHz,  $\text{CD}_3\text{OD}$ ):  $\delta$  7.05-7.00 (m, 3H), 6.91 (d,  $J = 8.0$  Hz, 2H), 6.71 (d,  $J = 2.0$  Hz, 1H), 6.65 (dd,  $J = 8.4, 2.0$  Hz, 1H), 6.62 (d,  $J = 8.4$  Hz, 1H), 6.22 (d,  $J = 2.0$  Hz, 1H), 6.16 (d,  $J = 2.0$  Hz, 1H), 4.85 (m, 1H), 4.21 (d,  $J = 14.2$  Hz, 1H), 3.97 (dd,  $J = 14.2, 6.0$  Hz, 1H), 3.82 (s, 3H), 3.81 (s, 3H), 3.71 (s, 3H).

$^1\text{H-NMR}$  (400 MHz,  $\text{CDCl}_3$ ):  $\delta$  7.10-7.03 (m, 3H), 6.94-6.92 (m, 2H), 6.82 (d,  $J = 2.2$  Hz, 1H), 6.67 (dd,  $J = 8.4, 2.2$  Hz, 1H), 6.60 (d,  $J = 8.4$  Hz, 1H), 6.28 (d,  $J = 1.8$  Hz, 1H), 6.11 (d,  $J = 1.8$  Hz, 1H), 5.43 (brs, 1H), 4.99 (d,  $J = 6.6$  Hz, 1H), 4.33 (d,  $J = 14.3$  Hz, 1H), 3.95 (dd,  $J = 14.3, 6.6$  Hz, 1H), 3.86 (s, 3H), 3.83 (s, 3H), 3.78 (s, 3H), 3.65 (s, 3H), 3.58 (brs, 1H), 1.86 (brs, 1H).

$^{13}\text{C-NMR}$  (100 MHz,  $\text{CD}_3\text{OD}$ ):  $\delta$  172.6, 165.2, 162.2, 159.3, 147.7, 146.0, 139.2, 130.0, 129.1, 128.5, 127.2, 120.7, 116.6, 111.2, 109.2, 102.7, 95.1, 93.1, 90.0, 80.6, 56.4, 56.2, 56.1, 56.0, 52.5, 52.2.

$^{13}\text{C-NMR}$  (100 MHz,  $\text{CDCl}_3$ ):  $\delta$  170.6, 164.1, 160.9, 157.0, 145.7, 144.6, 137.0, 127.8, 127.7, 127.6, 126.5, 119.7, 114.4, 109.5, 107.5, 101.8, 93.7, 92.6, 89.4, 79.5, 55.8, 55.7, 55.7, 55.0, 52.0, 50.5.

ESI-HRMS  $[\text{M}+\text{Na}]^+$ : calcd for  $\text{C}_{28}\text{H}_{28}\text{NaO}_9$ , 531.1631, found 531.1598.

methyl (1*R*\*,2*R*\*,3*S*\*)-1,8b-dihydroxy-6,8-dimethoxy-3-phenyl-3a-(thiophen-2-yl)-2,3,3a,8b-tetrahydro-1*H*-cyclopenta[*b*]benzofuran-2-carboxylate (**22a**); 43% in 3 steps.

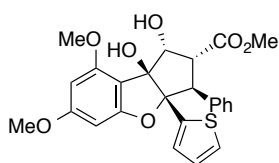

IR (ATR): 2950, 2844, 1735, 1623, 1597, 1499, 1455, 1436, 1339, 1276, 1216, 1200, 1146, 1116, 1033  $\text{cm}^{-1}$ .

$^1\text{H-NMR}$  (400 MHz,  $\text{CDCl}_3$ ):  $\delta$  7.13-7.09 (m, 4H), 7.02-6.99 (m, 2H), 6.89 (dd,  $J = 3.5, 1.1$  Hz, 1H), 6.87 (dd,  $J = 5.1, 3.5$  Hz, 1H), 6.28 (d,  $J = 1.8$  Hz, 1H), 6.14 (d,  $J = 1.8$  Hz, 1H), 4.97 (dd,  $J = 6.2, 1.8$  Hz, 1H), 4.33 (d,  $J = 14.3$  Hz, 1H), 3.92 (ddd,  $J = 14.3, 6.2, 1.1$  Hz, 1H), 3.88 (s, 3H), 3.83 (s, 3H), 3.65 (s, 3H), 3.43 (dd,  $J = 1.8, 1.1$  Hz, 1H), 2.01 (s, 1H).

$^1\text{H-NMR}$  (400 MHz, pyridine- $d_5$ ):  $\delta$  7.83 (br s, 1H), 7.39 (d,  $J = 7.6$  Hz, 2H), 7.29 (d,  $J = 3.4$  Hz, 1H), 7.17 (t,  $J = 7.6$  Hz, 2H), 7.09 (d,  $J = 5.5$  Hz, 1H), 7.07 (t,  $J = 7.6$  Hz, 1H), 7.01 (d,  $J = 4.8$  Hz, 1H), 6.90-6.88 (m, 1H), 6.42 (d,  $J = 2.1$  Hz, 1H), 6.29 (d,  $J = 2.1$  Hz, 1H), 5.63 (t,  $J = 5.5$  Hz, 1H), 5.12 (d,  $J = 13.8$  Hz, 1H), 4.57 (dd,  $J = 13.8, 5.5$  Hz, 1H), 3.69 (s, 3H), 3.65 (s, 3H), 3.60 (s, 3H).

$^{13}\text{C-NMR}$  (100 MHz,  $\text{CDCl}_3$ ):  $\delta$  170.4, 164.2, 160.9, 157.1, 137.4, 136.5, 127.8, 127.7, 126.8, 126.4, 125.9, 125.6, 107.0, 101.6, 93.5, 93.0, 89.4, 79.0, 55.8, 55.7, 55.0, 52.0, 50.1.

$^{13}\text{C-NMR}$  (100 MHz, pyridine- $d_5$ ):  $\delta$  171.4, 163.9, 161.8, 159.0, 141.1, 139.2, 128.7, 128.0, 126.69, 126.66, 126.62, 124.7, 109.2, 102.5, 94.7, 92.8, 89.4, 80.4, 56.3, 55.6, 55.4, 52.3, 51.5.

ESI-HRMS  $[\text{M}+\text{Na}]^+$ : calcd for  $\text{C}_{25}\text{H}_{24}\text{NaO}_7\text{S}$  491.1140, found 491.1099.

methyl (1*R*\*,2*R*\*,3*S*\*,3*aS*\*,8*bS*\*)-3*a*-(furan-2-yl)-1,8*b*-dihydroxy-6,8-dimethoxy-3-phenyl-2,3,3*a*,8*b*-tetrahydro-1*H*-cyclopenta[*b*]benzofuran-2-carboxylate (**22b**); 13% in 3 steps.

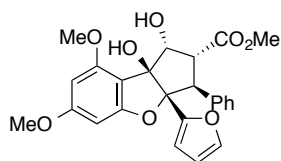

IR(ATR): 3505, 2950, 2844, 1742, 1625, 1600, 1499, 1455, 1437, 1344, 1285, 1216, 1201, 1147, 1122, 1083, 1033, 914, 813  $\text{cm}^{-1}$ .

$^1\text{H-NMR}$  (400 MHz,  $\text{CDCl}_3$ ):  $\delta$  7.30 (dd,  $J = 0.8, 2.0$  Hz, 1H), 7.17-7.08 (m, 5H), 6.26 (d,  $J = 2.0$  Hz, 1H), 6.18 (dd,  $J = 0.8, 3.4$  Hz, 1H), 6.13 (dd,  $J = 2.0, 3.4$  Hz, 1H), 6.12 (d,  $J = 2.0$  Hz, 1H), 4.94 (d,  $J = 6.0$  Hz, 1H), 4.30 (dd,  $J = 6.0, 14.0$  Hz, 1H), 4.17 (d,  $J = 14.0$  Hz, 1H), 3.85 (s, 3H), 3.81 (s, 3H), 3.64 (s, 3H), 3.42 (brs, 1H), 2.01 (s, 1H).

$^{13}\text{C-NMR}$  (100 MHz,  $\text{CDCl}_3$ ):  $\delta$  170.6, 164.2, 161.3, 156.9, 149.4, 142.6, 136.6, 127.8, 127.6, 126.8, 110.1, 109.6, 107.0, 100.2, 94.3, 92.9, 89.6, 79.3, 55.8, 55.7, 54.2, 52.0, 50.1.

ESI-HRMS  $[\text{M}+\text{Na}]^+$ : calcd for  $\text{C}_{25}\text{H}_{24}\text{NaO}_8$  475.1369, found 475.1365.

methyl(1*R*\*,2*R*\*,3*S*\*,3*aS*\*,8*bS*\*)-3*a*-(5-bromothiophen-2-yl)-1,8*b*-dihydroxy-6,8-dimethoxy-3-phenyl-2,3,3*a*,8*b*-tetrahydro-1*H*-cyclopenta[*b*]benzofuran-2-carboxylate (**22c**); 55% in 3 steps.

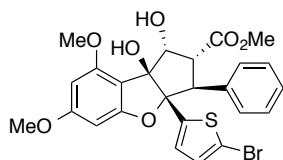

IR (ATR) : 3507, 1743, 1599, 1499, 1437, 1201, 1148, 1117, 885, 811  $\text{cm}^{-1}$ .

$^1\text{H-NMR}$  (400 MHz, pyridine- $d_5$ ):  $\delta$  7.42 (d,  $J = 7.4$  Hz, 2H), 7.19 (t,  $J = 7.4$  Hz, 2H), 7.06 (t,  $J = 7.4$  Hz, 1H), 6.95 (d,  $J = 3.9$  Hz, 1H), 6.87 (d,  $J = 3.9$  Hz, 1H), 6.46 (br, 1H), 6.29 (br, 1H), 5.58 (d,  $J = 4.9$  Hz, 1H), 5.15 (d,  $J = 14.1$  Hz, 1H), 4.53 (dd,  $J = 14.1, 4.9$  Hz, 1H), 3.72 (s, 3H), 3.61 (s, 3H), 3.59 (s, 3H).

$^{13}\text{C-NMR}$  (100 MHz, pyridine- $d_5$ ) :  $\delta$  171.3, 163.9, 161.8, 159.0, 143.3, 139.0, 129.9, 128.6, 128.2, 127.5, 126.9, 111.2, 108.7, 102.4, 94.8, 93.0, 89.3, 80.2, 56.1, 55.6, 55.3, 52.4, 51.6.

ESI-MS  $[\text{M}+\text{Na}]^+$  : calcd for  $\text{C}_{25}\text{H}_{23}^{79}\text{BrNaO}_7\text{S}$  567.0246, found 569.0238.  $\text{C}_{25}\text{H}_{23}^{81}\text{BrNaO}_7\text{S}$  571.0225, found 571.0225.

methyl (1*R*\*,2*R*\*,3*S*\*,3*aS*\*,8*bS*\*)-3*a*-(5-bromofuran-2-yl)-1,8*b*-dihydroxy-6,8-dimethoxy-3-phenyl-2,3,3*a*,8*b*-tetrahydro-1*H*-cyclopenta[*b*]benzofuran-2-carboxylate (**22d**); 32% in 3 steps.

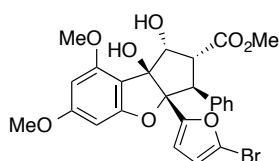

IR (ATR): 3483, 2951, 2842, 1738, 1625, 1600, 1505, 1455, 1437, 1376, 1343, 1284, 1201, 1148, 1116, 1073, 1034, 915, 813  $\text{cm}^{-1}$ .

$^1\text{H-NMR}$  (400 MHz,  $\text{CDCl}_3$ ):  $\delta$  7.20-7.10 (m, 5H), 6.24 (d,  $J = 2.0$  Hz, 1H), 6.14 (d,  $J = 3.2$  Hz, 1H), 6.12 (d,  $J = 2.0$  Hz, 1H), 6.02 (d,  $J = 3.2$  Hz, 1H), 4.92 (d,  $J = 6.0$  Hz, 1H), 4.26 (dd,  $J = 14.2, 6.0$  Hz, 1H), 4.18 (d,  $J = 14.2$  Hz, 1H), 3.86 (s, 3H), 3.81 (s, 3H), 3.65 (s, 3H), 3.31 (brs, 1H).

$^{13}\text{C-NMR}$  (100 MHz  $\text{CDCl}_3$ ):  $\delta$  170.6, 164.3, 161.2, 157.0, 151.2, 136.3, 127.9, 127.7, 127.0, 121.9, 112.0, 111.6, 106.8, 99.9, 94.2, 93.0, 89.6, 79.1, 55.8, 55.7, 54.1, 52.0, 49.9.

ESI-HRMS  $[M+Na]^+$ : calcd for  $C_{25}H_{23}^{79}BrNaO_8$  553.0474, found 553.0470. calcd for  $C_{25}H_{23}^{81}BrNaO_8$  555.0454, found 555.0448.

## Compound 4, **23a-d**

### *General procedure*

Rocaglamide derivative **22a** (10.3 mg, 0.022 mmol) was dissolved in 4.7 mL of a 5:1 mixture of dry THF and distilled water. Lithium hydroxide monohydrate (13.8 mg, 0.33 mmol) was added and the reaction mixture was stirred at rt for 23 h. The mixture was diluted with  $CH_2Cl_2$  and washed with 1N HCl and the organic layer was extracted with  $CH_2Cl_2$ . The combined organic layer was dried over  $Na_2SO_4$  and filtered. Concentration *in vacuo* gave rocagloic acid **23a** (9.7 mg, 0.021 mmol, 97%).

(1*R*\*,2*R*\*,3*S*\*,3*aR*\*,8*bS*\*)-1,8b-dihydroxy-3a-(3-hydroxy-4-methoxyphenyl)-6,8-dimethoxy-3-phenyl-2,3,3a,8b-tetrahydro-1*H*-cyclopenta[*b*]benzofuran-2-carboxylic acid (**4**); quant.

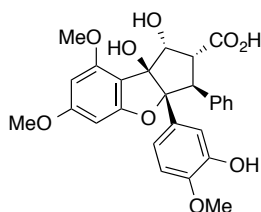

IR (ATR): 2934, 2842, 1725, 1597, 1499, 1428, 1333, 1268, 1216, 1199, 1146, 1120, 1030  $cm^{-1}$ .

<sup>1</sup>H-NMR (400 MHz, Py-*d*<sub>5</sub>):  $\delta$  7.56 (s, 1H), 7.54 (d,  $J = 4.8$  Hz, 2H), 7.17 (d,  $J = 5.8$  Hz, 1H), 7.11 (t,  $J = 4.8$  Hz, 2H), 6.96 (t,  $J = 4.8$  Hz, 1H), 6.70 (d,  $J = 5.8$  Hz, 1H), 6.48 (d,  $J = 1.2$  Hz, 1H), 6.27 (d,  $J = 1.2$  Hz, 1H), 5.82 (d,  $J = 3.2$  Hz, 1H), 5.36 (d,  $J = 9.2$  Hz, 1H), 4.80 (dd,  $J = 9.2, 3.2$  Hz, 1H), 3.73 (s, 3H), 3.63 (s, 3H), 3.52 (s, 3H).

<sup>1</sup>H-NMR (400 MHz, CDCl<sub>3</sub>):  $\delta$  7.09-7.04 (m, 3H), 6.94-6.92 (m, 2H), 6.78 (d,  $J = 2.0$  Hz, 1H), 6.63 (dd,  $J = 8.6, 2.0$  Hz, 1H), 6.58 (d,  $J = 8.6$  Hz, 1H), 6.25 (d,  $J = 2.0$  Hz, 1H), 6.09 (d,  $J = 2.0$  Hz, 1H), 4.98 (d,  $J = 6.6$  Hz, 1H), 4.26 (d,  $J = 14.1$  Hz, 1H), 3.92 (dd,  $J = 14.1, 6.6$  Hz, 1H), 3.81 (s, 6H), 3.76 (s, 3H).

<sup>13</sup>C-NMR (100 MHz, Py-*d*<sub>5</sub>): 173.7, 163.7, 162.4, 159.0, 147.1, 146.6, 140.5, 131.3, 129.0, 128.0, 126.2, 120.0, 117.3, 110.9, 109.8, 103.2, 95.3, 92.4, 89.3, 81.0, 56.4, 55.59, 55.56, 55.3,



53.3.

$^{13}\text{C}$ -NMR (100 MHz,  $\text{CDCl}_3$ ):  $\delta$  174.2, 164.0, 160.8, 157.0, 145.7, 144.5, 136.7, 127.8, 127.7, 127.5, 126.5, 119.6, 114.4, 109.5, 107.3, 101.7, 93.6, 92.6, 89.4, 79.3, 55.7, 55.7, 54.9, 50.2.

ESI-HRMS  $[\text{M}+\text{Na}]^+$ : calcd for  $\text{C}_{27}\text{H}_{26}\text{NaO}_9$ , 517.1475, found 517.1456.

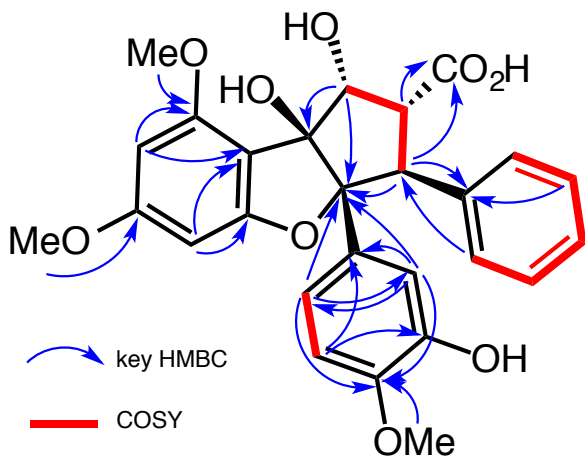

**Figure 1.** HMBC and COSY of **4**

(1*R*\*,2*R*\*,3*S*\*,3*aS*\*,8*bS*\*)-1,8b-dihydroxy-6,8-dimethoxy-3-phenyl-3a-(thiophen-2-yl)-2,3,3a,8b-tetrahydro-1*H*-cyclopenta[*b*]benzofuran-2-carboxylic acid (**23a**); 97%.

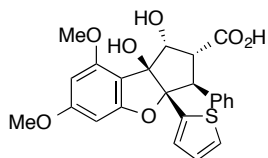

IR (ATR): 3472, 1717, 1599, 1499, 1200, 1148, 1118  $\text{cm}^{-1}$ .

$^1\text{H}$ -NMR (400 MHz,  $\text{CDCl}_3$ ):  $\delta$  7.09-7.06 (m, 4H), 6.98-6.96 (m, 2H), 6.85-6.83 (m, 2H), 6.24 (d,  $J = 1.8$  Hz, 1H), 6.10 (d,  $J = 1.8$  Hz, 1H), 4.94 (dd,  $J = 5.9, 1.8$  Hz, 1H), 4.24 (d,  $J = 13.9$  Hz, 1H), 3.87 (dd,  $J = 13.9, 5.9$  Hz, 1H), 3.83 (s, 3H), 3.80 (s, 3H).

$^{13}\text{C}$ -NMR (100 MHz,  $\text{CDCl}_3$ ):  $\delta$  174.1, 164.2, 160.8, 157.0, 137.2, 136.2, 127.8, 127.7, 126.9, 126.4, 126.0, 125.6, 106.8, 101.5, 93.4, 93.0, 89.4, 78.8, 55.78, 55.72, 54.9, 49.7.

ESI-HRMS  $[\text{M}+\text{Na}]^+$ : calcd for  $\text{C}_{24}\text{H}_{22}\text{NaO}_7\text{S}$  477.0984, found 477.0972.

(1*R*\*,2*R*\*,3*S*\*,3*aS*\*,8*bS*\*)-3a-(furan-2-yl)-1,8b-dihydroxy-6,8-dimethoxy-3-phenyl-2,3,3a,8b-tetrahydro-1*H*-cyclopenta[*b*]benzofuran-2-carboxylic acid (**23b**); 87%.

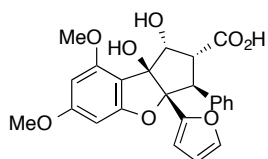

IR (ATR): 3373, 2938, 1716, 1602, 1501, 1454, 1217, 1200, 1148, 1122  $\text{cm}^{-1}$ .

$^1\text{H-NMR}$  (400 MHz,  $\text{CDCl}_3$ ):  $\delta$  7.29 (d,  $J = 2.0$  Hz, 1H), 7.15-7.09 (m, 5H), 6.24 (d,  $J = 2.0$  Hz, 1H), 6.16 (d,  $J = 3.2$  Hz, 1H), 6.13 (dd,  $J = 2.0, 3.2$  Hz, 1H), 6.10 (d,  $J = 2.0$  Hz, 1H), 4.95 (d,  $J = 6.0$  Hz, 1H), 4.28 (dd,  $J = 6.0, 14.2$  Hz, 1H), 4.12 (d,  $J = 14.2$  Hz, 1H), 3.82 (s, 3H), 3.80 (s, 3H).

$^{13}\text{C-NMR}$  (100 MHz,  $\text{CDCl}_3$ ):  $\delta$  174.3, 164.3, 161.2, 156.9, 149.2, 142.6, 136.3, 127.9, 127.7, 126.9, 110.1, 109.6, 106.8, 100.1, 94.2, 92.9, 89.6, 79.1, 55.8, 55.7, 54.1, 49.7.

ESI-HRMS  $[\text{M}+\text{Na}]^+$ : calcd for  $\text{C}_{24}\text{H}_{22}\text{NaO}_8$  461.1212, found 461.1143.

(1*R*\*,2*R*\*,3*S*\*,3*aS*\*,8*bS*\*)-3*a*-(5-bromothiophen-2-yl)-1,8*b*-dihydroxy-6,8-dimethoxy-3-phenyl-2,3,3*a*,8*b*-tetrahydro-1*H*-cyclopenta[*b*]benzofuran-2-carboxylic acid (**23c**); 66%

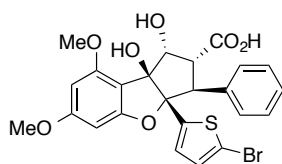

IR (ATR) : 3450, 1725, 1599, 1501, 1217, 1146, 1118  $\text{cm}^{-1}$ .

$^1\text{H-NMR}$  (400 MHz, pyridine- $d_5$ ):  $\delta$  7.56-7.54 (m, 2H), 7.21-7.17 (m, 2H), 7.04 (t,  $J = 7.4$  Hz, 1H), 6.97 (d,  $J = 3.9$  Hz, 1H), 6.87 (d,  $J = 3.9$  Hz, 1H), 6.49 (d,  $J = 1.9$  Hz, 1H), 6.31 (d,  $J = 1.9$  Hz, 1H), 5.77 (d,  $J = 4.7$  Hz, 1H), 5.30 (d,  $J = 14.0$  Hz, 1H), 4.68 (dd,  $J = 14.0, 4.7$  Hz, 1H), 3.73 (s, 3H), 3.63 (s, 3H).

$^{13}\text{C-NMR}$  (100 MHz, pyridine- $d_5$ ) :  $\delta$  173.3, 163.8, 162.0, 159.0, 143.7, 139.6, 129.8, 128.8, 128.1, 127.4, 126.7, 111.0, 109.0, 102.7, 94.9, 92.9, 89.3, 80.4, 56.4, 55.6, 55.3, 52.8.

ESI-MS  $[\text{M}+\text{Na}]^+$  : calcd for  $\text{C}_{24}\text{H}_{21}^{79}\text{BrNaO}_7\text{S}$  555.0089, found 555.0072.  $\text{C}_{24}\text{H}_{21}^{81}\text{BrNaO}_7\text{S}$  557.0069, found 557.0047.

(1*R*\*,2*R*\*,3*S*\*,3*aS*\*,8*bS*\*)-3*a*-(5-bromofuran-2-yl)-1,8*b*-dihydroxy-6,8-dimethoxy-3-phenyl-2,3,3*a*,8*b*-tetrahydro-1*H*-cyclopenta[*b*]benzofuran-2-carboxylic acid (**23d**); quant.

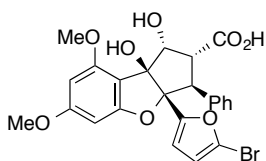

IR (ATR): 3477, 2944, 2024, 1717, 1626, 1503, 1455, 1200, 1148, 1117  $\text{cm}^{-1}$ .

$^1\text{H-NMR}$  (400 MHz,  $\text{CD}_3\text{OD}$ ):  $\delta$  7.20-7.06 (m, 5H), 6.23 (d,  $J = 1.8$  Hz, 1H), 6.16 (d,  $J = 1.8$  Hz, 1H), 6.09 (d,  $J = 3.4$  Hz, 1H), 6.01 (d,  $J = 3.4$  Hz, 1H), 4.77 (d,  $J = 5.2$  Hz, 1H), 4.17 (dd,  $J = 13.8, 5.2$  Hz, 1H), 4.09 (d,  $J = 13.8$  Hz, 1H), 3.82 (s, 3H), 3.80 (s, 3H).

$^{13}\text{C-NMR}$  (100 MHz  $\text{CD}_3\text{OD}$ ):  $\delta$  174.2, 165.4, 162.6, 159.5, 154.3, 138.8, 129.1, 128.6, 127.5, 122.0, 112.3, 112.3, 101.2, 108.2, 95.7, 93.3, 89.8, 79.8, 56.1, 55.9, 55.7, 52.2.

ESI-HRMS  $[\text{M}+\text{Na}]^+$ : calcd for  $\text{C}_{24}\text{H}_{21}^{79}\text{BrNaO}_8$  539.0318, found 539.0265,  $\text{C}_{24}\text{H}_{21}^{81}\text{BrNaO}_8$  541.0297, found 541.0243.

### Reporter gene assay and transfection for Wnt signal inhibitory activity

A cell-based assay method was previously described (Li et al., 2009, *Chem. Asian J.* 4, 540–547). This assay was used to evaluate TCF/ $\beta$ -catenin transcriptional activity. Assay cells (STF/293 cells) were seeded into 96-well plates ( $3 \times 10^4$  cells/well). After 24 h, the cells were treated with compounds combined with 15 mM LiCl for another 24 h. The cells were then lysed, and luciferase activity was measured using the Luciferase Assay System (Promega) on a Luminoskan Ascent (Thermo). To eliminate the nonspecific inhibition of TOP activity, FOP activity was also evaluated. HEK293 cells were plated on 24-well plates ( $1 \times 10^5$  cells/well) and incubated for 24 h. Using Lipofectamine 2000, the cells were transiently transfected with 500 ng/well of the luciferase reporter construct (SuperFOPflash), and 25 ng/well of pRL-CMV (Promega, USA) for normalization. Compounds combined with 15 mM LiCl were then added to the cells 12 h post-transfection. After being incubated for 24 h with the compounds, cells were lysed and luciferase activity was measured using PICAGENE Dual Seapansy (Toyo Ink) with Luminoskan Ascent (Thermo).

### Viability assay

STF/293 ( $3 \times 10^4$  cells/well), AGS, HCT116, SW480, DLD1, RKO and HEK293 cells ( $5 \times 10^3$  cells/well) were seeded into 96-well plates for 24 h. Compounds were then added and incubated as described. The viability of cells was measured using the fluorometric microculture cytotoxicity assay (FMCA) (Lindhagen et al., 2008, *Nat. Protoc.* 3, 1364–1369). After being

incubated with the compounds, cells were washed with PBS and then added to fluorescein diacetate (Wako, Japan) in PBS. Cells were incubated for 1 h and fluorescence was measured using a Fluoroskan (Ascent).

**Figure 2** Comparison of coupling constant of synthetic compound **5** with reported value.

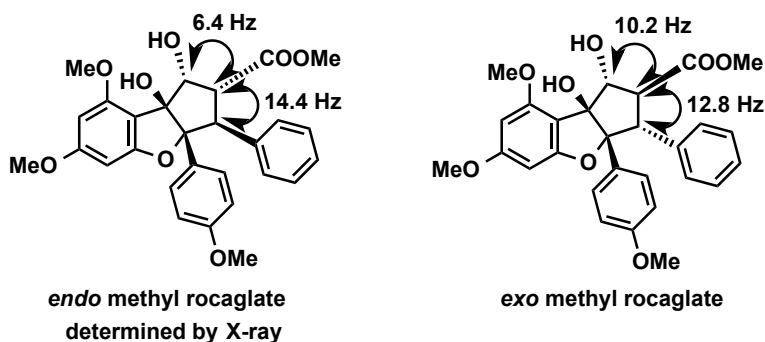

Baudouin Gerard; Sheharbano Sangji; Daniel J. O'Leary; John A. Porco, Jr. *J. Am. Chem. Soc.* 2006, 128, 7754-7755.

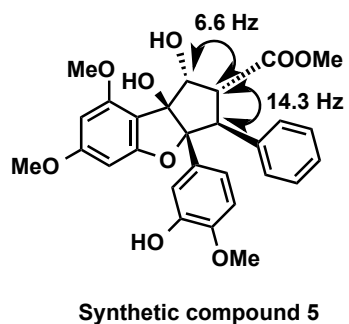

**Table 1** Comparison of data of synthetic compound **5** with reported value.

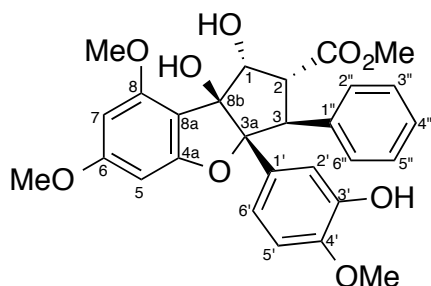

| position           | <sup>1</sup> H-NMR δ ( <i>J</i> in Hz) |                      | <sup>13</sup> C-NMR δ ( <i>J</i> in Hz) |                  |
|--------------------|----------------------------------------|----------------------|-----------------------------------------|------------------|
|                    | <b>5</b> (400 MHz)                     | ref 10               | <b>5</b> (100 MHz)                      | ref 10           |
| 1                  | overlapped                             | 4.89 (d, 6.2)        | 80.6                                    | 80.7             |
| 2                  | 3.96 (dd, 6.3, 14.1)                   | 4.01 (dd, 6.2, 14.2) | 52.2                                    | 52.2             |
| 3                  | 4.22 (d, 14.1)                         | 4.27 (d, 14.2)       | 56.4                                    | 56.4             |
| 3a                 |                                        |                      | 102.7                                   | 102.8            |
| 4a                 |                                        |                      | *                                       | **               |
| 5                  | 6.27 (d, 2.0)                          | 6.32 (d, 1.9)        | 90.0                                    | 90.0             |
| 6                  |                                        |                      | *                                       | **               |
| 7                  | 6.16 (d, 2.0)                          | 6.21 (d, 2.0)        | 93.1                                    | 93.1             |
| 8                  |                                        |                      | *                                       | **               |
| 8a                 |                                        |                      | 109.2                                   | 109.3            |
| 8b                 |                                        |                      | 95.1                                    | 95.1             |
| 1'                 |                                        |                      | 130.0                                   | 130.1            |
| 2'                 | 6.71 (d, 2.2)                          | 6.76 (d, 2.0)        | 116.6                                   | 116.7            |
| 3'                 |                                        |                      | 146.0                                   | 146.0            |
| 4'                 |                                        |                      | *                                       | **               |
| 5'                 | 6.62 (d, 8.4)                          | 6.67 (d, 8.6)        | 111.2                                   | 111.2            |
| 6'                 | 6.65 (dd, 2.2, 8.4)                    | 6.70 (dd, 2.1, 8.5)  | 120.7                                   | 120.7            |
| 1''                |                                        |                      | 139.2                                   | 139.2            |
| 2''/6''            | 6.91 (m)                               | 6.95 (m)             | 129.1                                   | 129.1            |
| 3''/5''            | 7.01 (m)                               | 7.05 (m)             | 128.5                                   | 128.5            |
| 4''                | 7.01 (m)                               | 7.05 (m)             | 127.2                                   | 127.2            |
| 6-OMe              | 3.81 (s)                               | 3.86 (s)             | 56.2, 56.1, 56.0                        | 56.2, 56.1, 56.0 |
| 8-OMe              | 3.82 (s)                               | 3.87 (s)             |                                         |                  |
| 4'-OMe             | 3.70 (s)                               | 3.76 (s)             |                                         |                  |
| CO <sub>2</sub> Me |                                        |                      | 172.6                                   | 172.6            |
| CO-OMe             | 3.61 (s)                               | 3.66 (s)             | 52.5                                    | 52.5             |

\*147.7, 159.3, 162.2, 165.2 exchangeable

\*\*147.8, 159.3, 162.2, 165.3 exchangeable  
(in CD<sub>3</sub>OD)

**Table 2** Comparison of data of synthetic compound **4** with reported value.

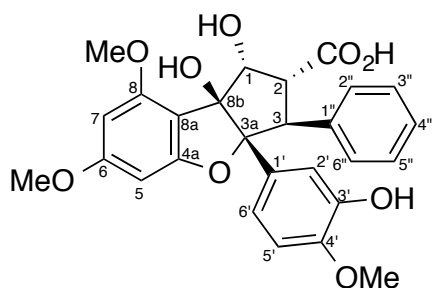

| position          | <sup>1</sup> H-NMR δ (J in Hz) |                      | <sup>13</sup> C-NMR δ (J in Hz) |                   |
|-------------------|--------------------------------|----------------------|---------------------------------|-------------------|
|                   | <b>4</b><br>(400 MHz)          | ref 5<br>(400 MHz)   | <b>4</b><br>(100MHz)            | ref 5<br>(100MHz) |
| 1                 | 4.98 (d, 6.6)                  | 4.93 (d, 5.5)        | 79.3                            | 78.8              |
| 2                 | 3.92 (dd, 6.6, 14.1)           | 3.87 (dd, 5.5, 14.5) | 50.2                            | 51.4              |
| 3                 | 4.26 (d, 14.1)                 | 4.29 (d, 14.5)       | 55.7                            | 55.9              |
| 3a                |                                |                      | 101.7                           | 101.7             |
| 4a                |                                |                      | 160.8                           | 161.1             |
| 5                 | 6.25 (d, 2.0)                  | 6.28 (d, 2.0)        | 89.4                            | 88.9              |
| 6                 |                                |                      | 164.0                           | 163.9             |
| 7                 | 6.09 (d, 2.0)                  | 6.13 (d, 2.0)        | 92.6                            | 92.4              |
| 8                 |                                |                      | 157.0                           | 157.4             |
| 8a                |                                |                      | 107.3                           | 106.9             |
| 8b                |                                |                      | 93.6                            | 93.7              |
| 1'                |                                |                      | 127.5                           | 127.7             |
| 2'                | 6.78 (d, 2.0)                  | 6.84 (d, 2.5)        | 114.4                           | 114.6             |
| 3'                |                                |                      | 144.5                           | 144.3             |
| 4'                |                                |                      | 145.7                           | 145.8             |
| 5'                | 6.58 (d, 8.6)                  | 6.60 (d, 8.5)        | 109.5                           | 109.6             |
| 6'                | 6.63 (dd, 2.0, 8.6)            | 6.71 (dd, 2.5, 8.5)  | 119.6                           | 119.5             |
| 1''               |                                |                      | 136.7                           | 136.5             |
| 2''/6''           | 7.09-7.04 (m)                  | 7.14-7.06 (m)        | 127.7                           | 128.2             |
| 3''/5''           | 6.94-6.92 (m)                  | 7.14-7.06 (m)        | 127.8                           | 128.8             |
| 4''               | 7.09-7.04 (m)                  | 7.14-7.06 (m)        | 126.5                           | 126.7             |
| Ar-OMe            | 3.81 (s)                       | 3.86 (s)             | 55.7                            | 55.6              |
|                   | 3.81 (s)                       | 3.84 (s)             | 55.7                            | 55.6              |
|                   | 3.76 (s)                       | 3.77 (s)             | 54.9                            | 55.6              |
| CO <sub>2</sub> H |                                |                      | 174.2                           | 173.2             |

(in CDCl<sub>3</sub>)

**Figure 3** TRAIL resistance overcoming activity of **5**, **22c** and **23c**.

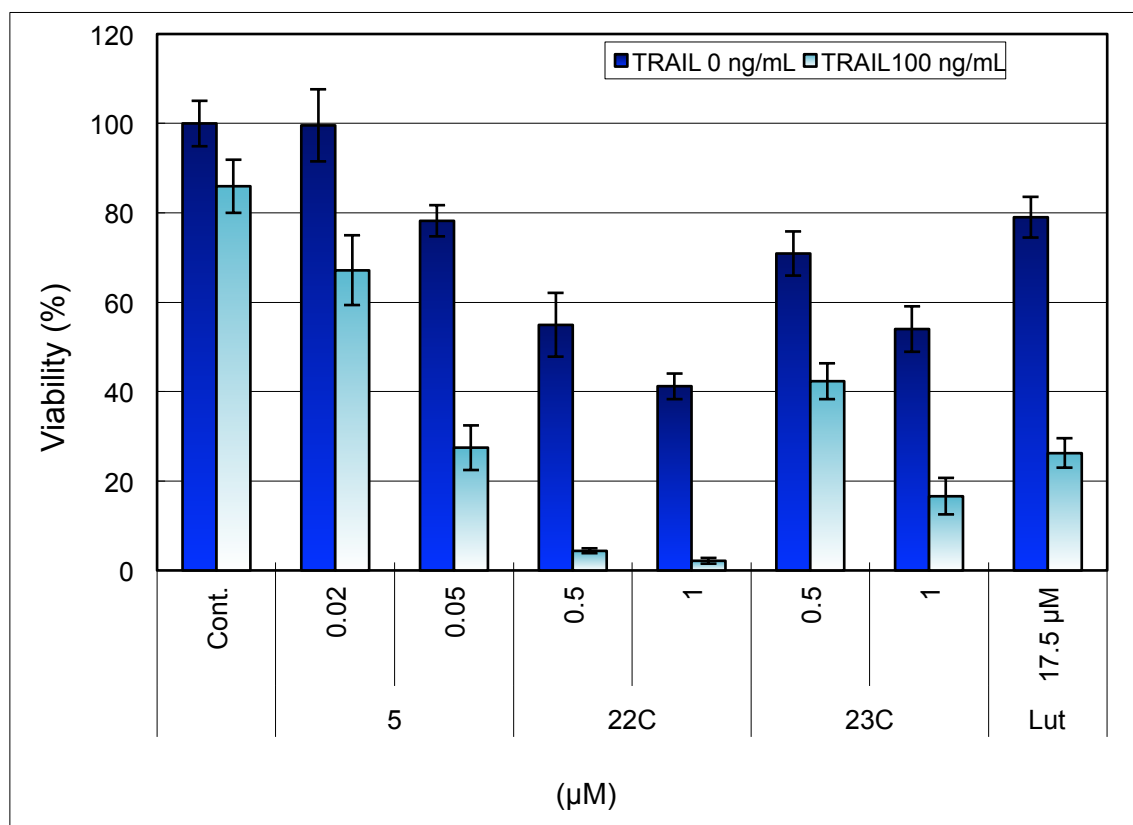

X-ray data for **22a**

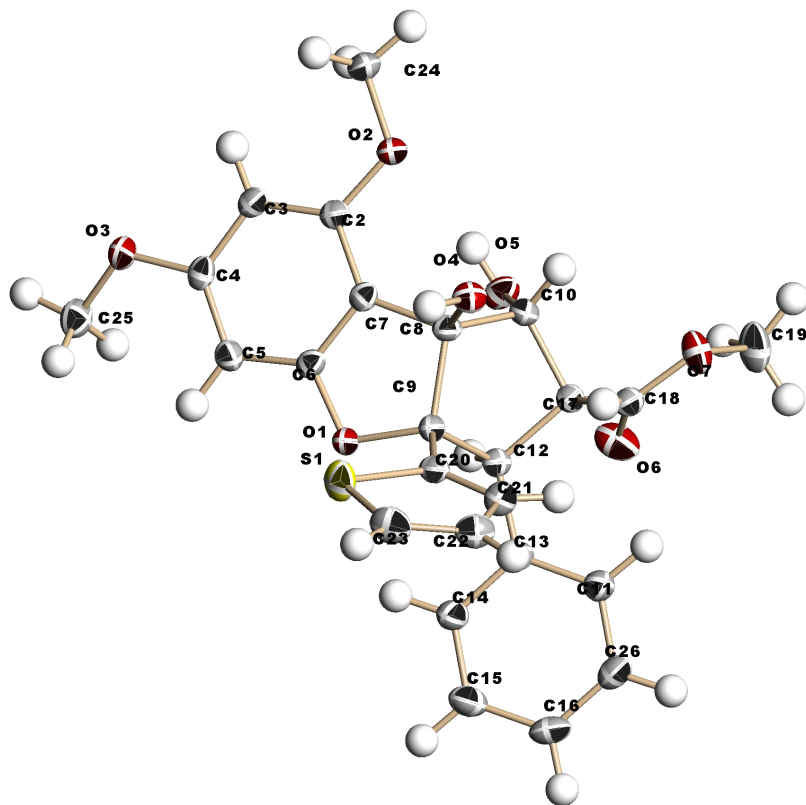

Figure 4. X-ray structure of compound **22a**.

Table 3. Crystal data for **22a**

**Chemical formula**  $C_{25}H_{24}O_7S$

**Formula weight** 468.50

**Wavelength** 1.54178 Å

**Crystal size** 0.200 x 0.200 x 0.800 mm

**Crystal system** orthorhombic

**Space group** Pbc<sub>a</sub>

**Unit cell dimensions**

a = 9.8131(3) Å  $\alpha = 90^\circ$

b = 20.4457(5) Å  $\beta = 90^\circ$

c = 21.4000(6) Å  $\gamma = 90^\circ$



**Volume** 4293.6(2) Å<sup>3</sup>

**Z** 8

**Density (calculated)** 1.450 g/cm<sup>3</sup>

**Absorption coefficient** 1.744 mm<sup>-1</sup>

**F(000)** 1968

#### **Table 4. Data collection and structure refinement for 22a**

**Theta range for data collection** 4.13 to 68.11°

**Index ranges** -11 ≤ h ≤ 9, -24 ≤ k ≤ 23, -25 ≤ l ≤ 23

**Reflections collected** 14098

**Independent reflections** 3851 [R(int) = 0.0174]

**Coverage of independent**

**Reflections** 98.3%

**Absorption correction** multi-scan

**Max. and min. transmission** 0.7217 and 0.3359

**Structure solution technique** direct methods

**Structure solution program** SHELXS-97 (Sheldrick, 1997)

**Refinement method** Full-matrix least-squares on F<sup>2</sup>

**Refinement program** SHELXL-97 (Sheldrick, 1997)

**Function minimized**  $\sum w(F_o^2 - F_c^2)^2$

**Data / restraints / parameters** 3851 / 0 / 355

**Goodness-of-fit on F<sup>2</sup>** 1.035

**Final R indices** 3510 data; I > 2σ(I) R1 = 0.0374, wR2 = 0.0999

all data R1 = 0.0404, wR2 = 0.1030

**Weighting scheme**  $w = 1 / [\sigma^2(F_o^2) + (0.0672P)^2 + 1.5656P]$  where  $P = (F_o^2 + 2F_c^2) / 3$

**Largest diff. peak and hole** 0.337 and -0.252 eÅ<sup>-3</sup>

**R.M.S. deviation from mean** 0.049 eÅ<sup>-3</sup>

X-ray data for **23c**

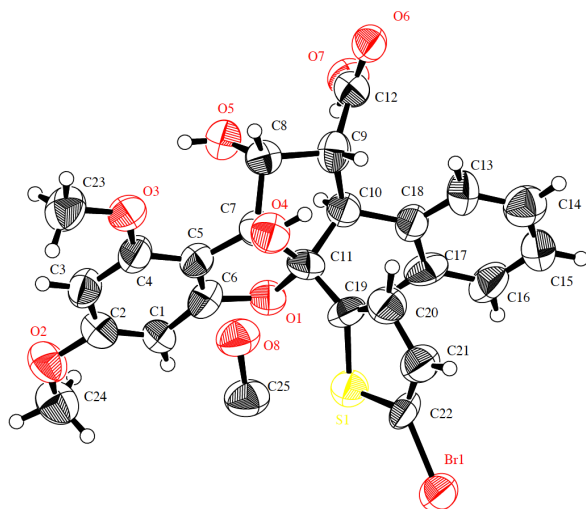

**Figure 5.** X-ray structure of compound **23c**.

**Table 5.** Crystal data for **23c**

A. Crystal Data

|                      |                                                                                                             |
|----------------------|-------------------------------------------------------------------------------------------------------------|
| Empirical Formula    | C <sub>25</sub> H <sub>21</sub> BrO <sub>8</sub> S                                                          |
| Formula Weight       | 561.40                                                                                                      |
| Crystal Color, Habit | colorless, platelet                                                                                         |
| Crystal Dimensions   | 0.200 X 0.030 X 0.010 mm                                                                                    |
| Crystal System       | monoclinic                                                                                                  |
| Lattice Type         | Primitive                                                                                                   |
| Lattice Parameters   | a = 11.1283(3) Å<br>b = 29.5193(7) Å<br>c = 7.7932(2) Å<br>β = 108.307(2) °<br>V = 2430.5(1) Å <sup>3</sup> |
| Space Group          | P2 <sub>1</sub> /c (#14)                                                                                    |

|                   |                         |
|-------------------|-------------------------|
| Z value           | 4                       |
| D <sub>calc</sub> | 1.534 g/cm <sup>3</sup> |
| F <sub>000</sub>  | 1144.00                 |
| m(CuKα)           | 35.352 cm <sup>-1</sup> |

## B. Intensity Measurements

|                                       |                                                                                                                              |
|---------------------------------------|------------------------------------------------------------------------------------------------------------------------------|
| Diffractometer                        | R-AXIS RAPID                                                                                                                 |
| Radiation                             | CuKα (λ = 1.54187 Å)                                                                                                         |
| Voltage, Current                      | 40kV, 30mA                                                                                                                   |
| Temperature                           | -180.0°C                                                                                                                     |
| Detector Aperture                     | 460 x 256 mm                                                                                                                 |
| Data Images                           | 30 exposures                                                                                                                 |
| w oscillation Range (c=54.0, f=0.0)   | 80.0 - 260.0°                                                                                                                |
| Exposure Rate                         | 10.0 sec./°                                                                                                                  |
| w oscillation Range (c=54.0, f=90.0)  | 80.0 - 260.0°                                                                                                                |
| Exposure Rate                         | 10.0 sec./°                                                                                                                  |
| w oscillation Range (c=54.0, f=180.0) | 80.0 - 260.0°                                                                                                                |
| Exposure Rate                         | 10.0 sec./°                                                                                                                  |
| w oscillation Range (c=54.0, f=270.0) | 80.0 - 260.0°                                                                                                                |
| Exposure Rate                         | 10.0 sec./°                                                                                                                  |
| w oscillation Range (c=0.0, f=0.0)    | 80.0 - 260.0°                                                                                                                |
| Exposure Rate                         | 10.0 sec./°                                                                                                                  |
| Detector Position                     | 127.40 mm                                                                                                                    |
| Pixel Size                            | 0.100 mm                                                                                                                     |
| 2θ <sub>max</sub>                     | 136.5°                                                                                                                       |
| No. of Reflections Measured           | Total: 26111<br>Unique: 4455 (R <sub>int</sub> = 0.2105)                                                                     |
| Corrections                           | Lorentz-polarization<br>Absorption<br>(trans. factors: 0.564 - 0.965)<br>Secondary Extinction<br>(coefficient: 1.17000e-003) |

### C. Structure Solution and Refinement

|                                       |                                                                                                                 |
|---------------------------------------|-----------------------------------------------------------------------------------------------------------------|
| Structure Solution                    | Direct Methods                                                                                                  |
| Refinement                            | Full-matrix least-squares on $F^2$                                                                              |
| Function Minimized                    | $\sum w (F_o^2 - F_c^2)^2$                                                                                      |
| Least Squares Weights                 | $w = 1 / [ s^2(F_o^2) + (0.1860 \cdot P)^2 + 0.0000 \cdot P ]$<br>where $P = (\text{Max}(F_o^2, 0) + 2F_c^2)/3$ |
| $2\sigma_{\text{max}}$ cutoff         | 136.5 $^\circ$                                                                                                  |
| Anomalous Dispersion                  | All non-hydrogen atoms                                                                                          |
| No. Observations (All reflections)    | 4455                                                                                                            |
| No. Variables                         | 317                                                                                                             |
| Reflection/Parameter Ratio            | 14.05                                                                                                           |
| Residuals: R1 ( $I > 2.00\sigma(I)$ ) | 0.1210                                                                                                          |
| Residuals: R (All reflections)        | 0.2434                                                                                                          |
| Residuals: wR2 (All reflections)      | 0.3993                                                                                                          |
| Goodness of Fit Indicator             | 1.014                                                                                                           |
| Max Shift/Error in Final Cycle        | 0.000                                                                                                           |
| Maximum peak in Final Diff. Map       | 1.07 e $^-/\text{\AA}^3$                                                                                        |
| Minimum peak in Final Diff. Map       | -0.94 e $^-/\text{\AA}^3$                                                                                       |

X-ray data for **23d**

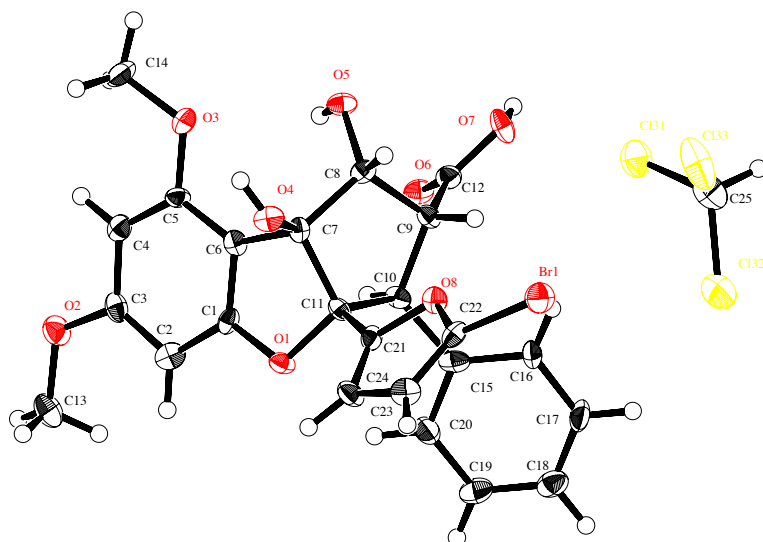

**Figure 6.** X-ray structure of compound **23d**.

**Table 6.** Crystal data for **23d**

A. Crystal Data

|                      |                                                                                                                                                                                                                        |
|----------------------|------------------------------------------------------------------------------------------------------------------------------------------------------------------------------------------------------------------------|
| Empirical Formula    | $C_{25}H_{22}BrCl_3O_8$                                                                                                                                                                                                |
| Formula Weight       | 636.71                                                                                                                                                                                                                 |
| Crystal Color, Habit | colorless, platelet                                                                                                                                                                                                    |
| Crystal Dimensions   | 0.200 X 0.050 X 0.050 mm                                                                                                                                                                                               |
| Crystal System       | triclinic                                                                                                                                                                                                              |
| Lattice Type         | Primitive                                                                                                                                                                                                              |
| Lattice Parameters   | $a = 9.7833(3) \text{ \AA}$<br>$b = 10.5843(4) \text{ \AA}$<br>$c = 14.6153(5) \text{ \AA}$<br>$\alpha = 74.063(2)^\circ$<br>$\beta = 80.510(2)^\circ$<br>$\gamma = 63.284(2)^\circ$<br>$V = 1298.37(8) \text{ \AA}^3$ |
| Space Group          | P-1 (#2)                                                                                                                                                                                                               |

|                   |                         |
|-------------------|-------------------------|
| Z value           | 2                       |
| D <sub>calc</sub> | 1.629 g/cm <sup>3</sup> |
| F <sub>000</sub>  | 644.00                  |
| m(CuKa)           | 54.275 cm <sup>-1</sup> |

### B. Intensity Measurements

|                                       |                                                                                                                              |
|---------------------------------------|------------------------------------------------------------------------------------------------------------------------------|
| Diffractometer                        | R-AXIS RAPID                                                                                                                 |
| Radiation                             | CuKa (λ = 1.54187 Å)                                                                                                         |
| Voltage, Current                      | 40kV, 30mA                                                                                                                   |
| Temperature                           | -180.0 °C                                                                                                                    |
| Detector Aperture                     | 460 x 256 mm                                                                                                                 |
| Data Images                           | 30 exposures                                                                                                                 |
| w oscillation Range (c=54.0, f=0.0)   | 80.0 - 260.0 °                                                                                                               |
| Exposure Rate                         | 4.0 sec./°                                                                                                                   |
| w oscillation Range (c=54.0, f=90.0)  | 80.0 - 260.0 °                                                                                                               |
| Exposure Rate                         | 4.0 sec./°                                                                                                                   |
| w oscillation Range (c=54.0, f=180.0) | 80.0 - 260.0 °                                                                                                               |
| Exposure Rate                         | 4.0 sec./°                                                                                                                   |
| w oscillation Range (c=54.0, f=270.0) | 80.0 - 260.0 °                                                                                                               |
| Exposure Rate                         | 4.0 sec./°                                                                                                                   |
| w oscillation Range (c=0.0, f=0.0)    | 80.0 - 260.0 °                                                                                                               |
| Exposure Rate                         | 4.0 sec./°                                                                                                                   |
| Detector Position                     | 127.40 mm                                                                                                                    |
| Pixel Size                            | 0.100 mm                                                                                                                     |
| 2θ <sub>max</sub>                     | 136.5 °                                                                                                                      |
| No. of Reflections Measured           | Total: 13987<br>Unique: 4644 (R <sub>int</sub> = 0.0629)                                                                     |
| Corrections                           | Lorentz-polarization<br>Absorption<br>(trans. factors: 0.617 - 0.762)<br>Secondary Extinction<br>(coefficient: 2.40000e-004) |

### C. Structure Solution and Refinement

|                                       |                                                                                                                 |
|---------------------------------------|-----------------------------------------------------------------------------------------------------------------|
| Structure Solution                    | Direct Methods                                                                                                  |
| Refinement                            | Full-matrix least-squares on $F^2$                                                                              |
| Function Minimized                    | $\sum w (F_o^2 - F_c^2)^2$                                                                                      |
| Least Squares Weights                 | $w = 1 / [ s^2(F_o^2) + (0.0000 \cdot P)^2 + 8.1150 \cdot P ]$<br>where $P = (\text{Max}(F_o^2, 0) + 2F_c^2)/3$ |
| $2\sigma_{\text{max}}$ cutoff         | 136.5 $^\circ$                                                                                                  |
| Anomalous Dispersion                  | All non-hydrogen atoms                                                                                          |
| No. Observations (All reflections)    | 4644                                                                                                            |
| No. Variables                         | 335                                                                                                             |
| Reflection/Parameter Ratio            | 13.86                                                                                                           |
| Residuals: R1 ( $I > 2.00\sigma(I)$ ) | 0.0547                                                                                                          |
| Residuals: R (All reflections)        | 0.1044                                                                                                          |
| Residuals: wR2 (All reflections)      | 0.1490                                                                                                          |
| Goodness of Fit Indicator             | 1.137                                                                                                           |
| Max Shift/Error in Final Cycle        | 0.000                                                                                                           |
| Maximum peak in Final Diff. Map       | 0.77 e $^-/\text{\AA}^3$                                                                                        |
| Minimum peak in Final Diff. Map       | -0.84 e $^-/\text{\AA}^3$                                                                                       |

Compound 8

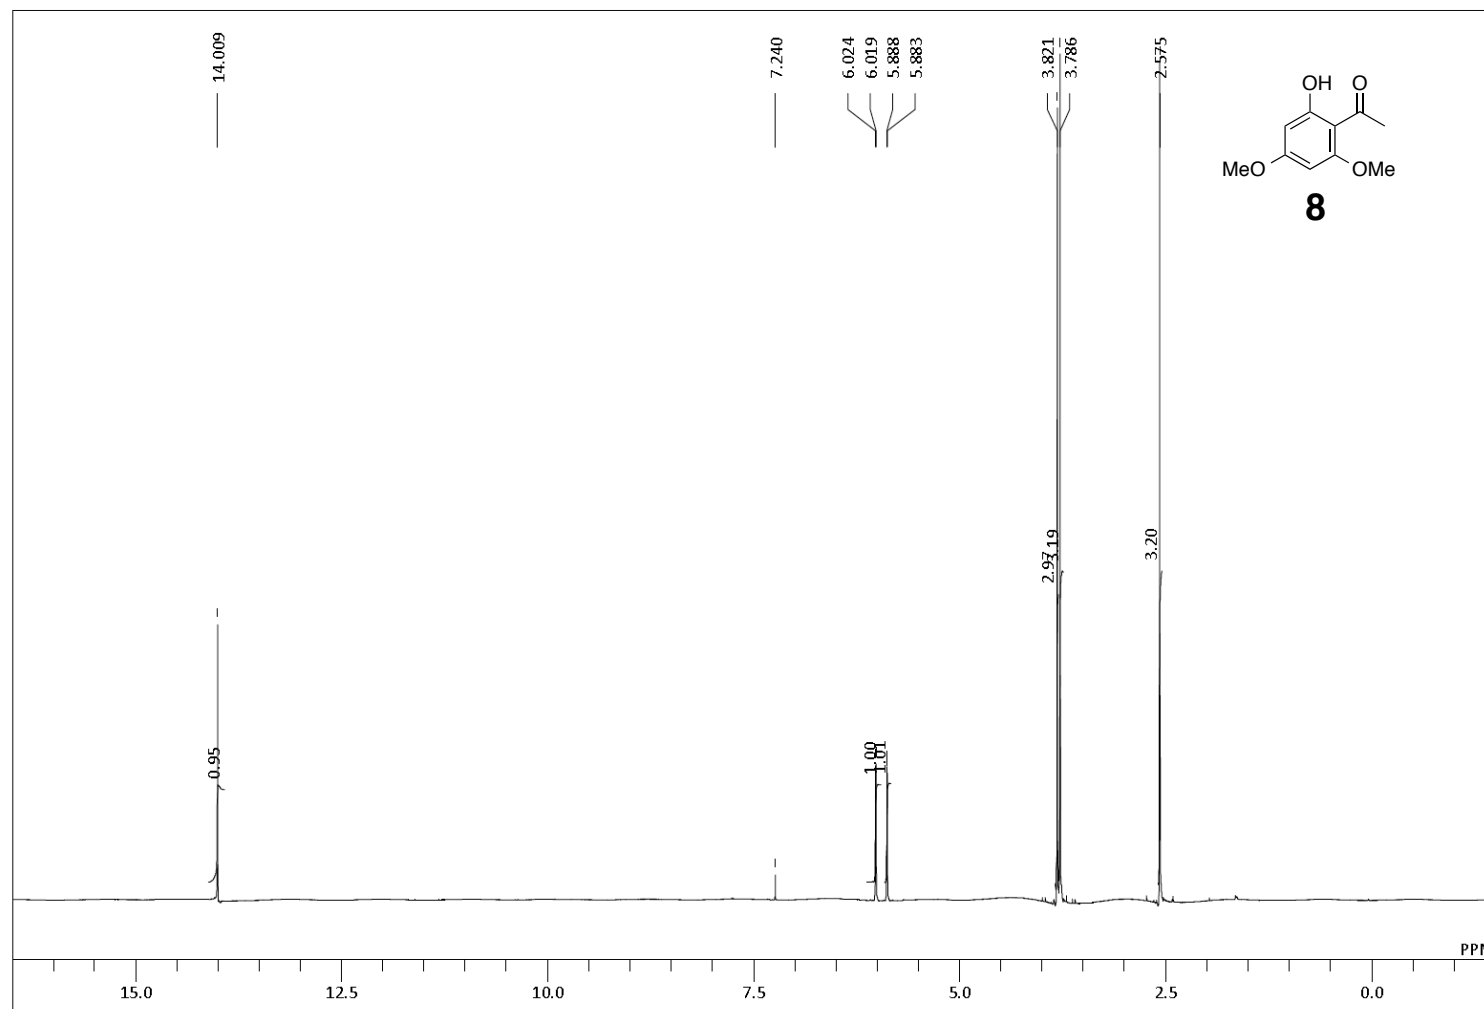



# Compound 8

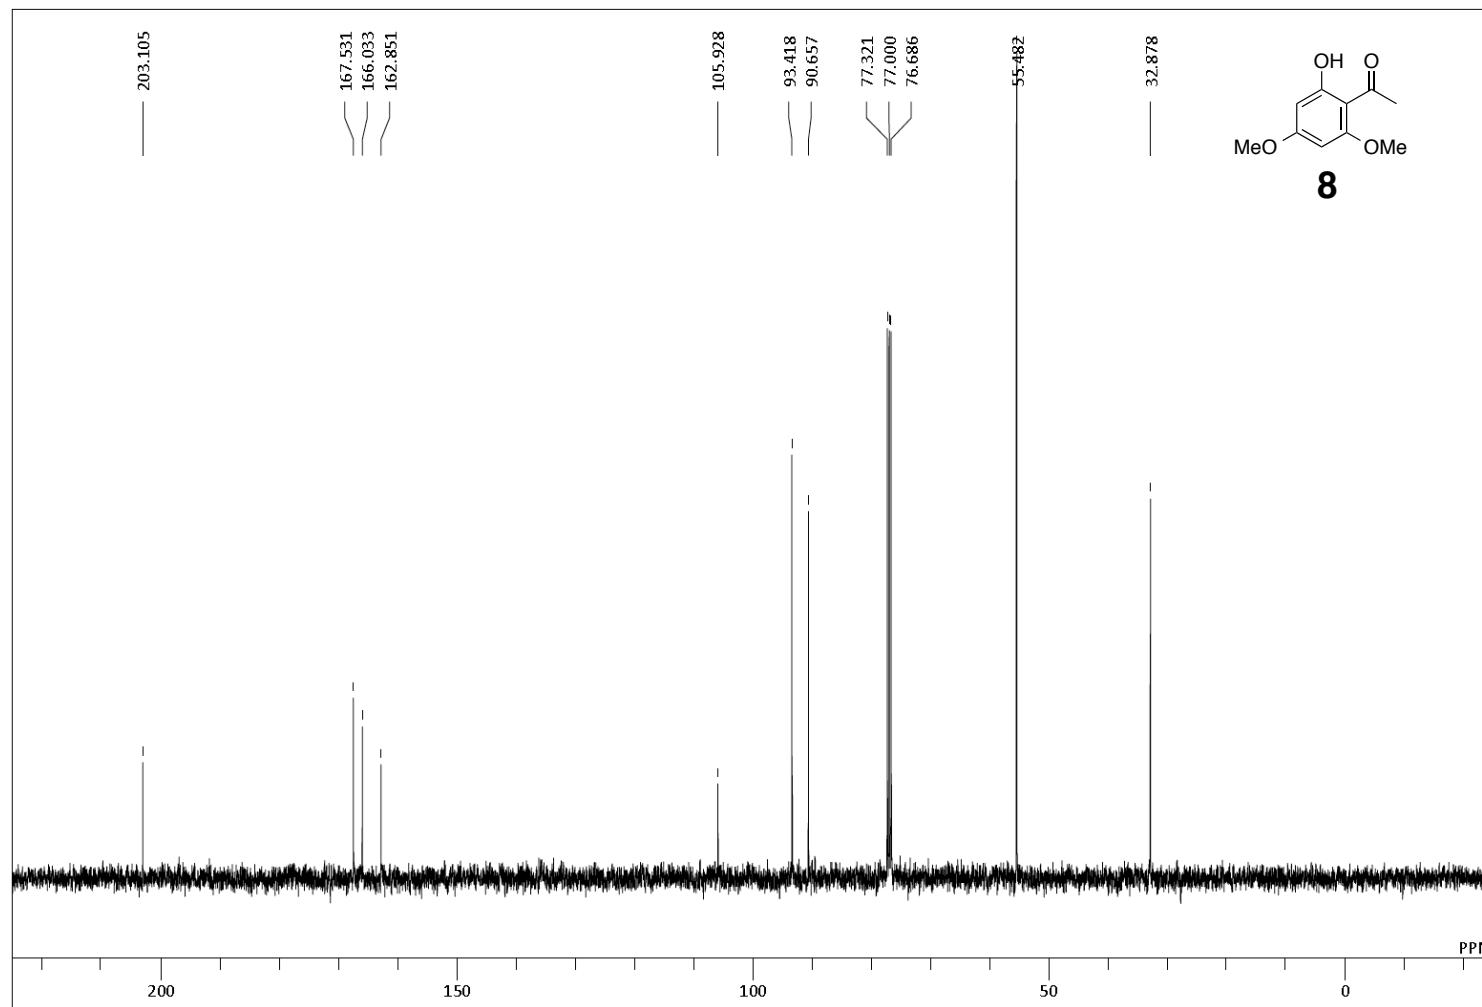

Compound **9**

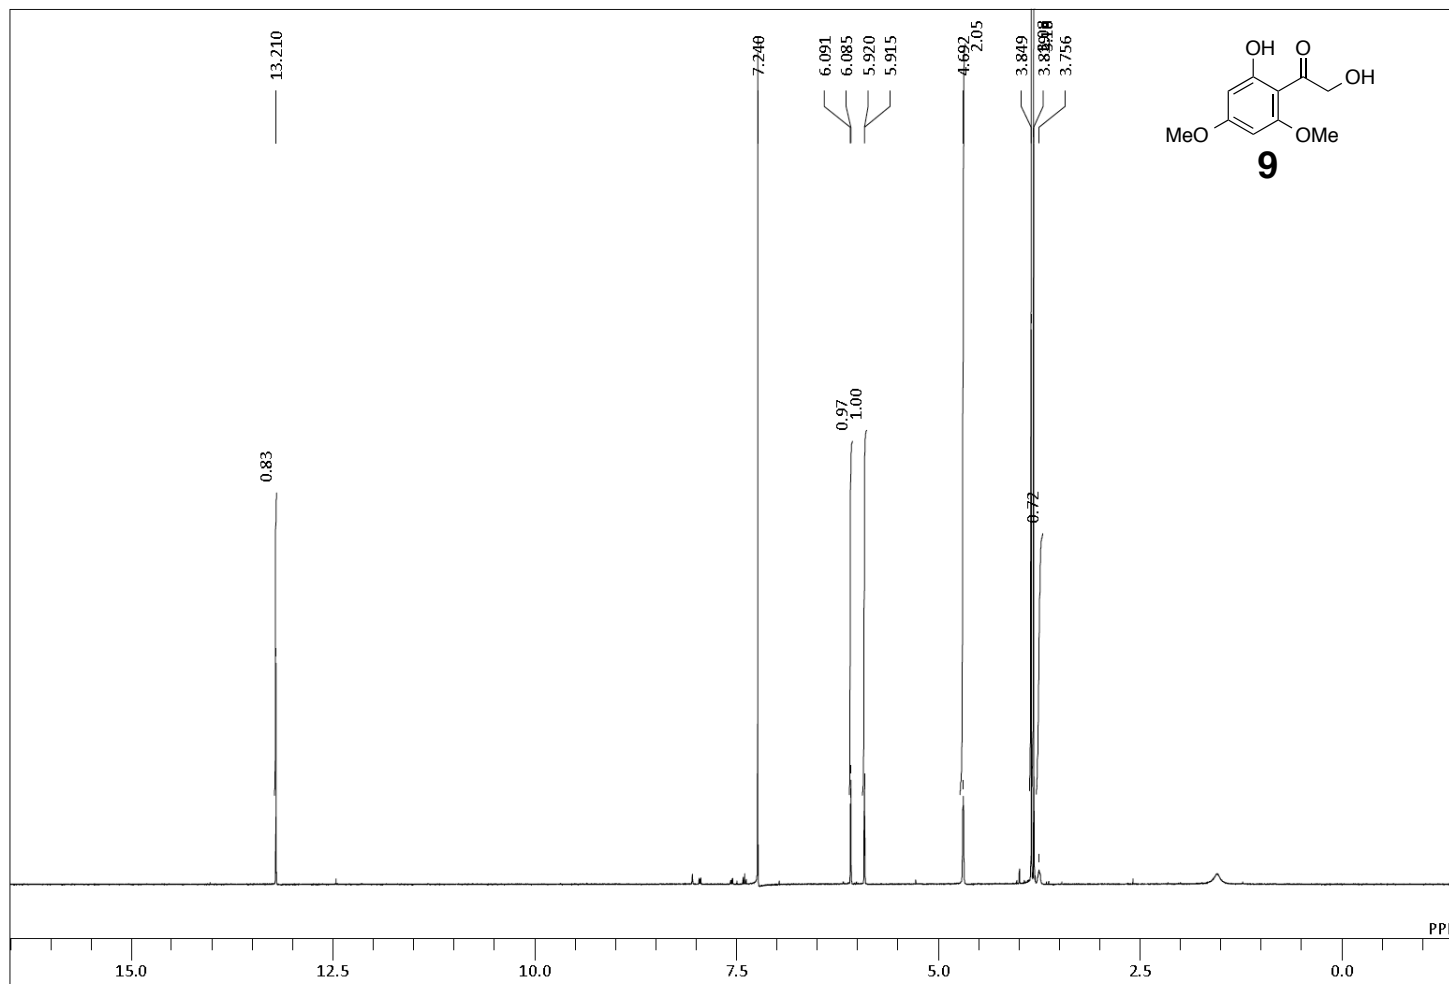

# Compound 9

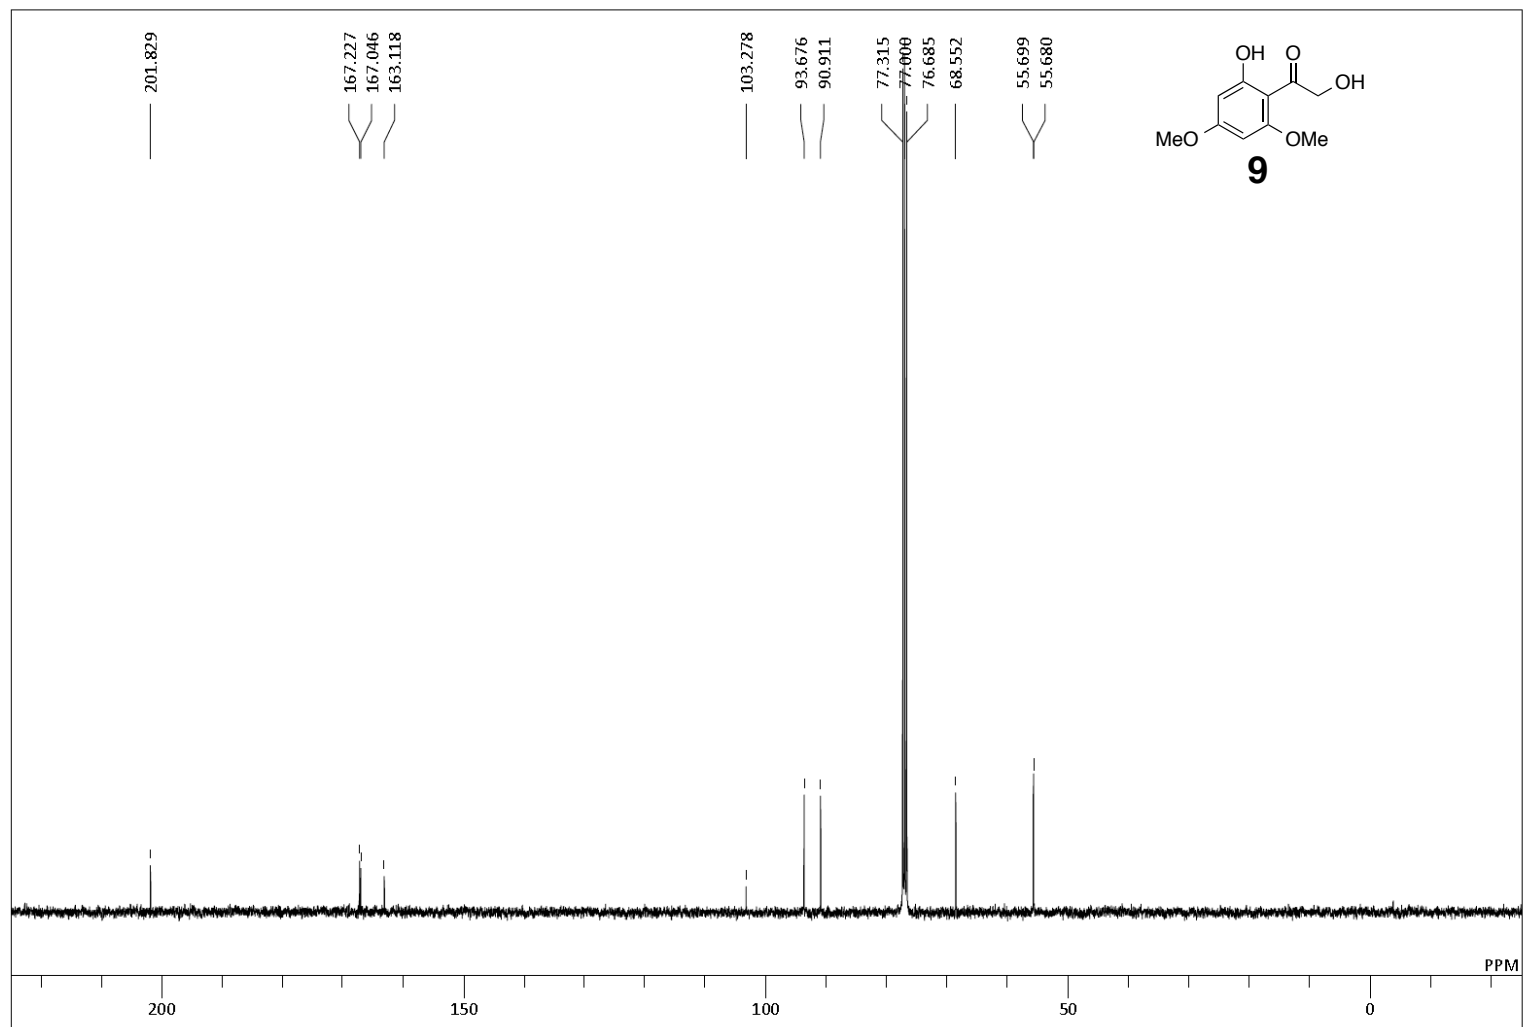

# Compound 10

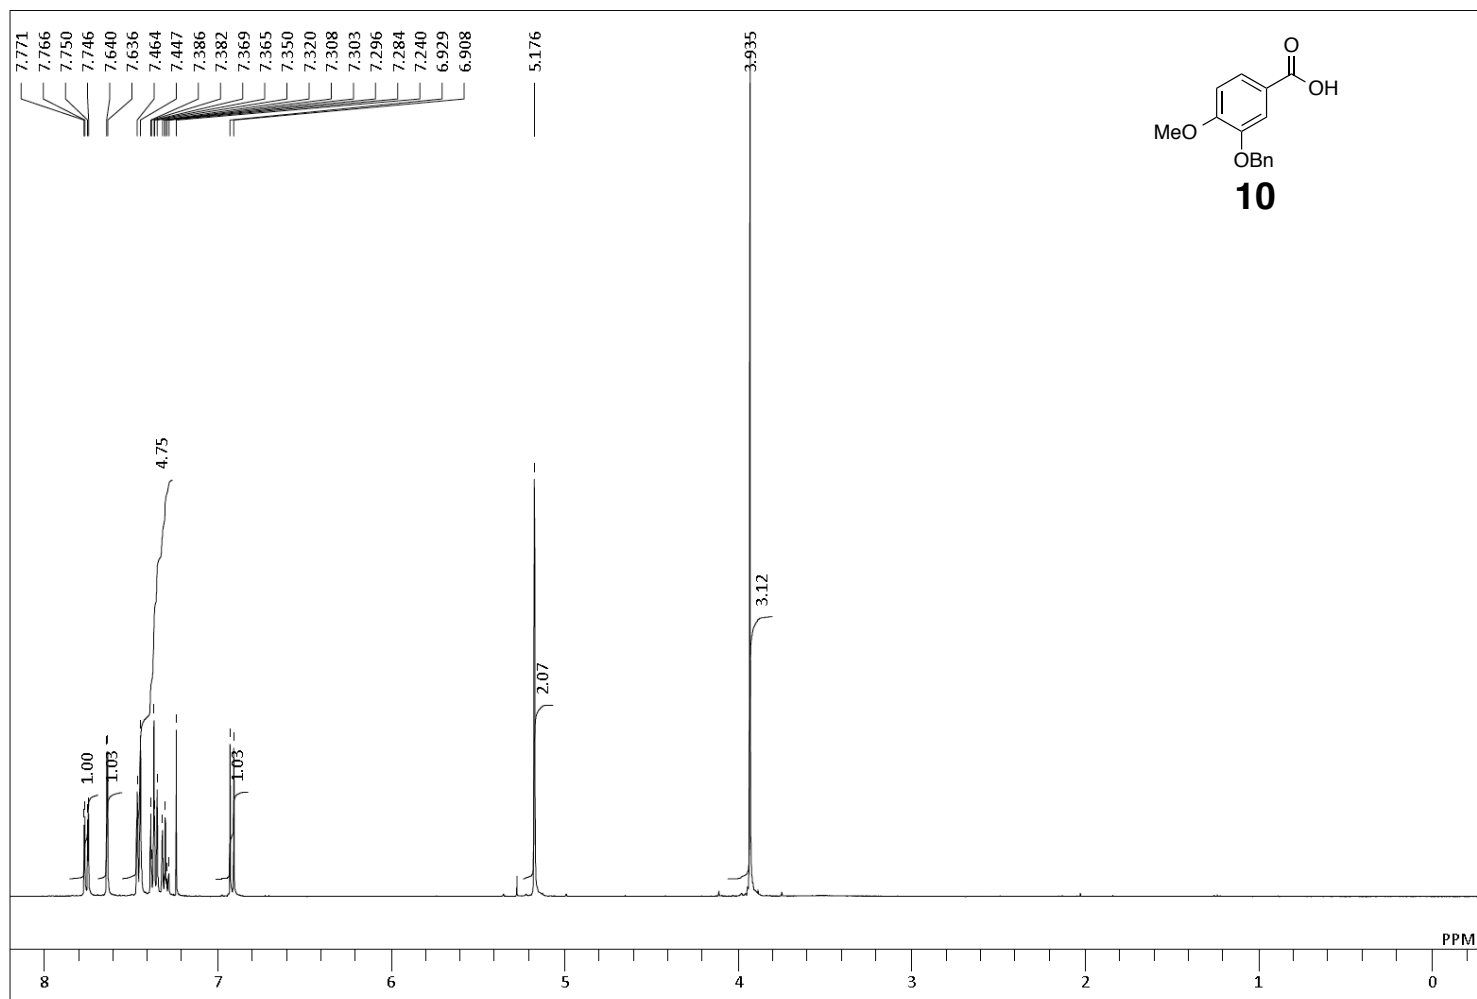

Compound 10

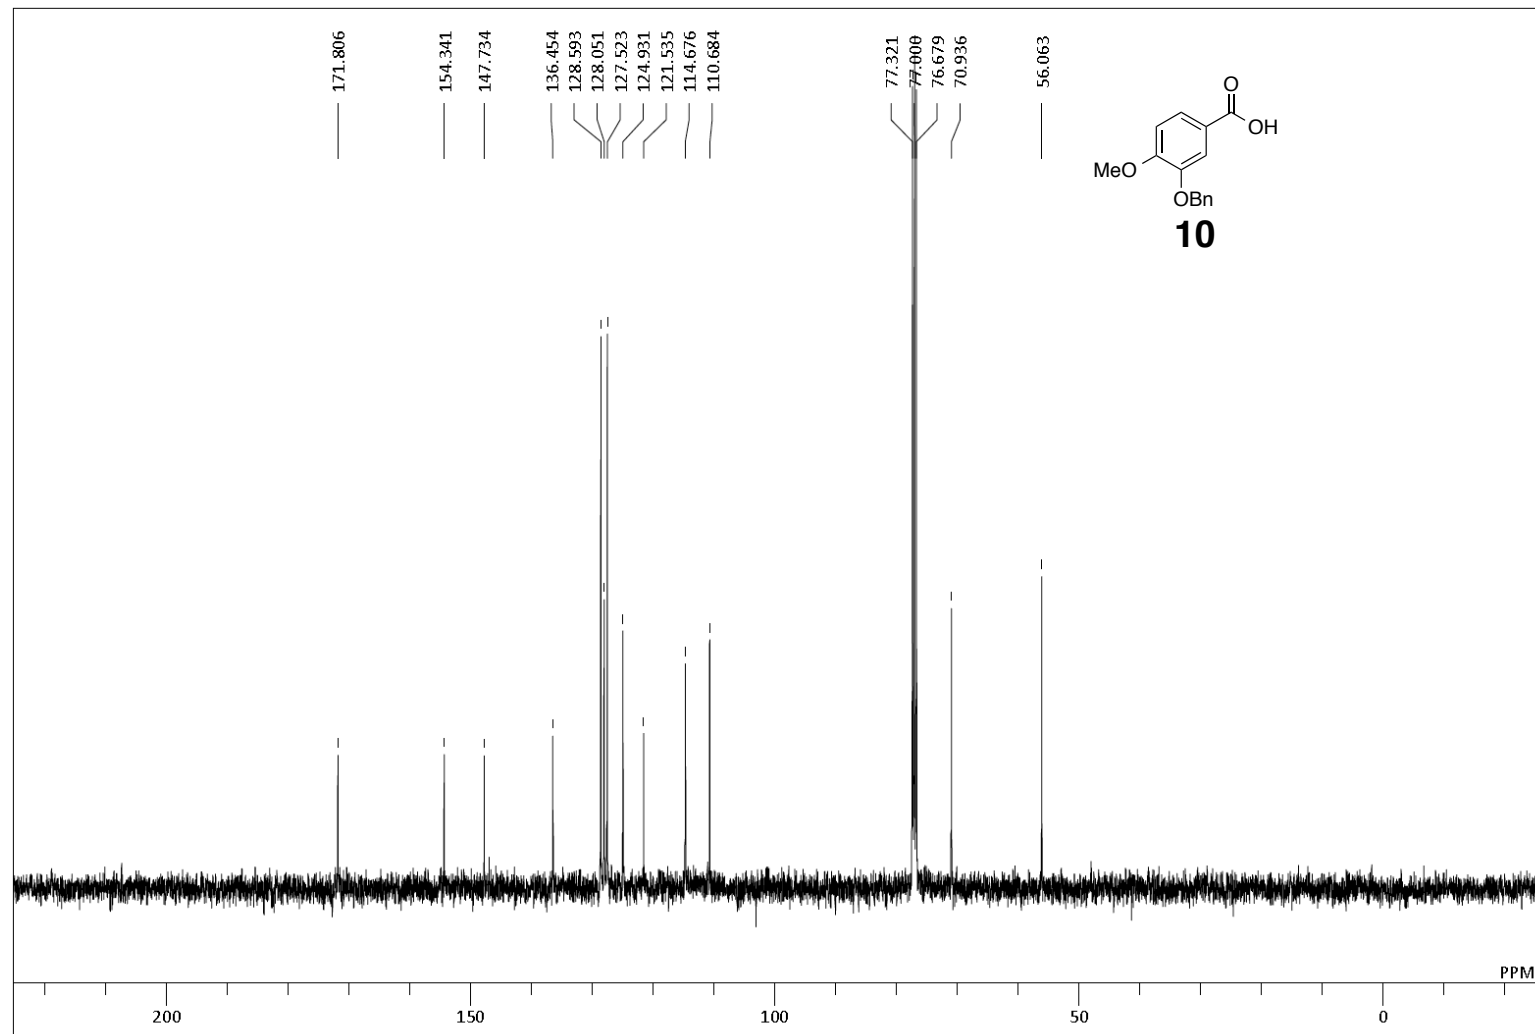

# Compound 11

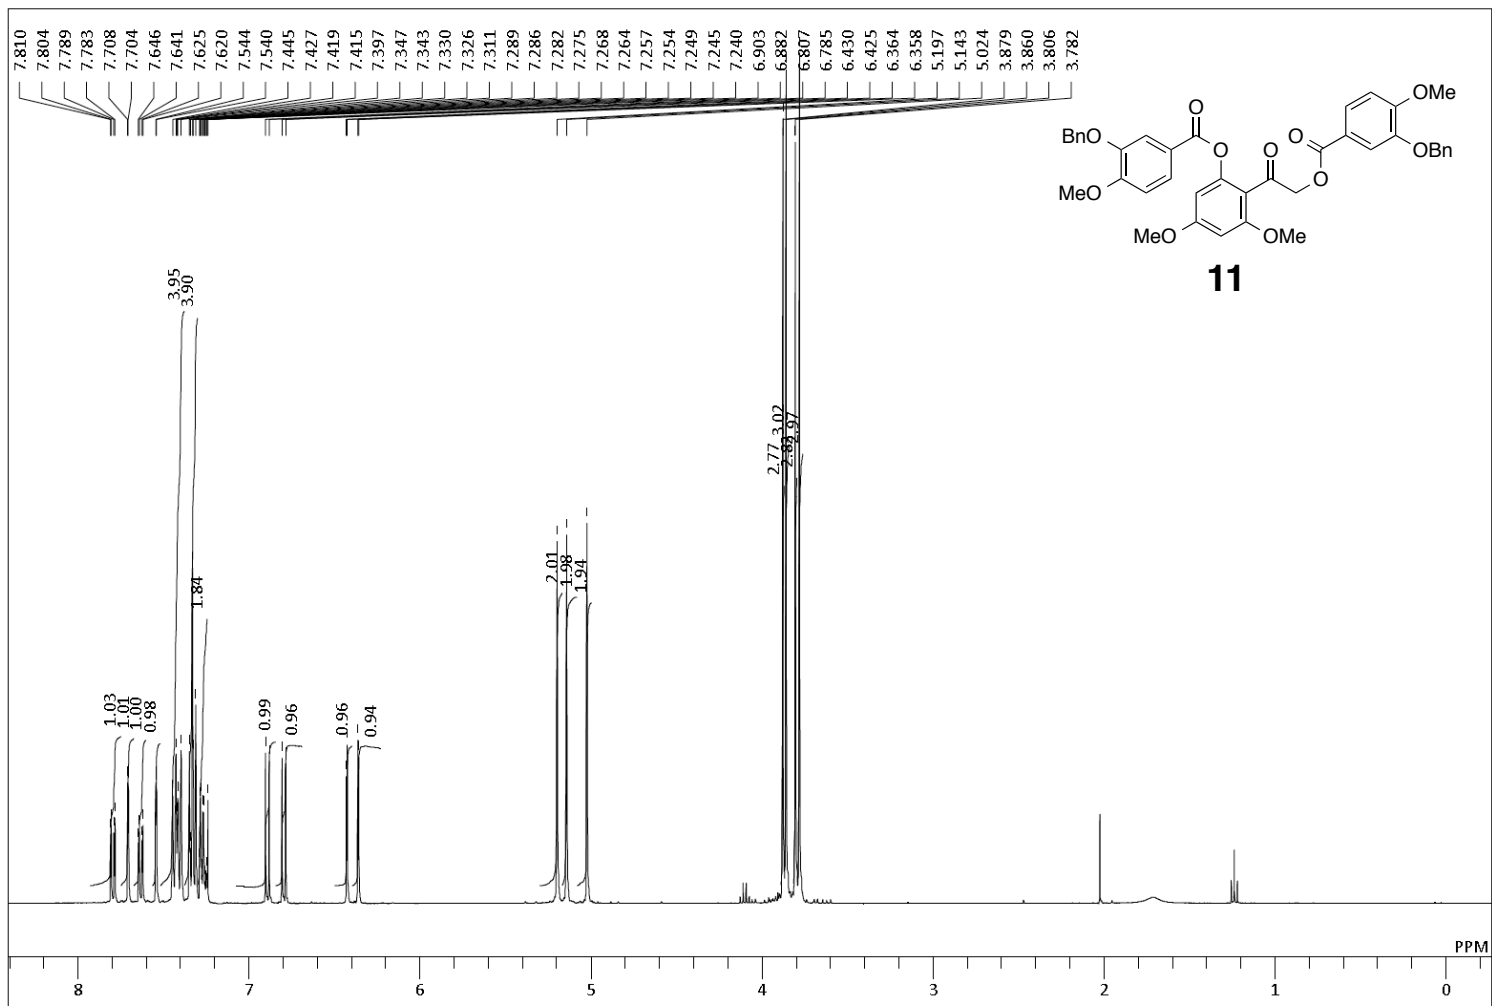

# Compound 11

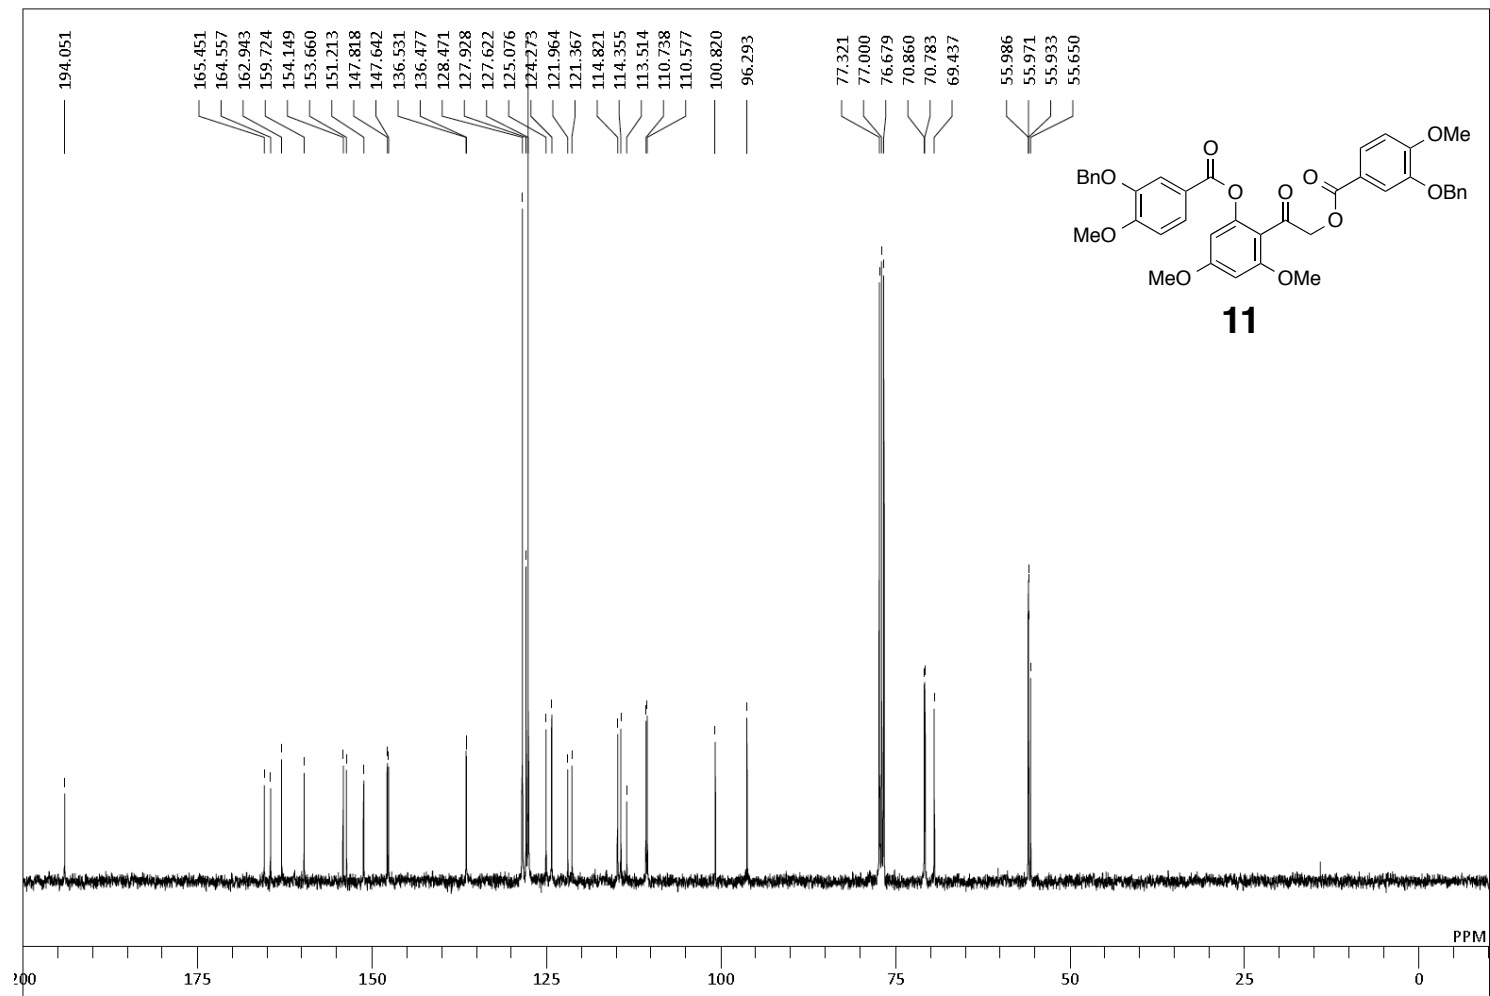

# Compound 12

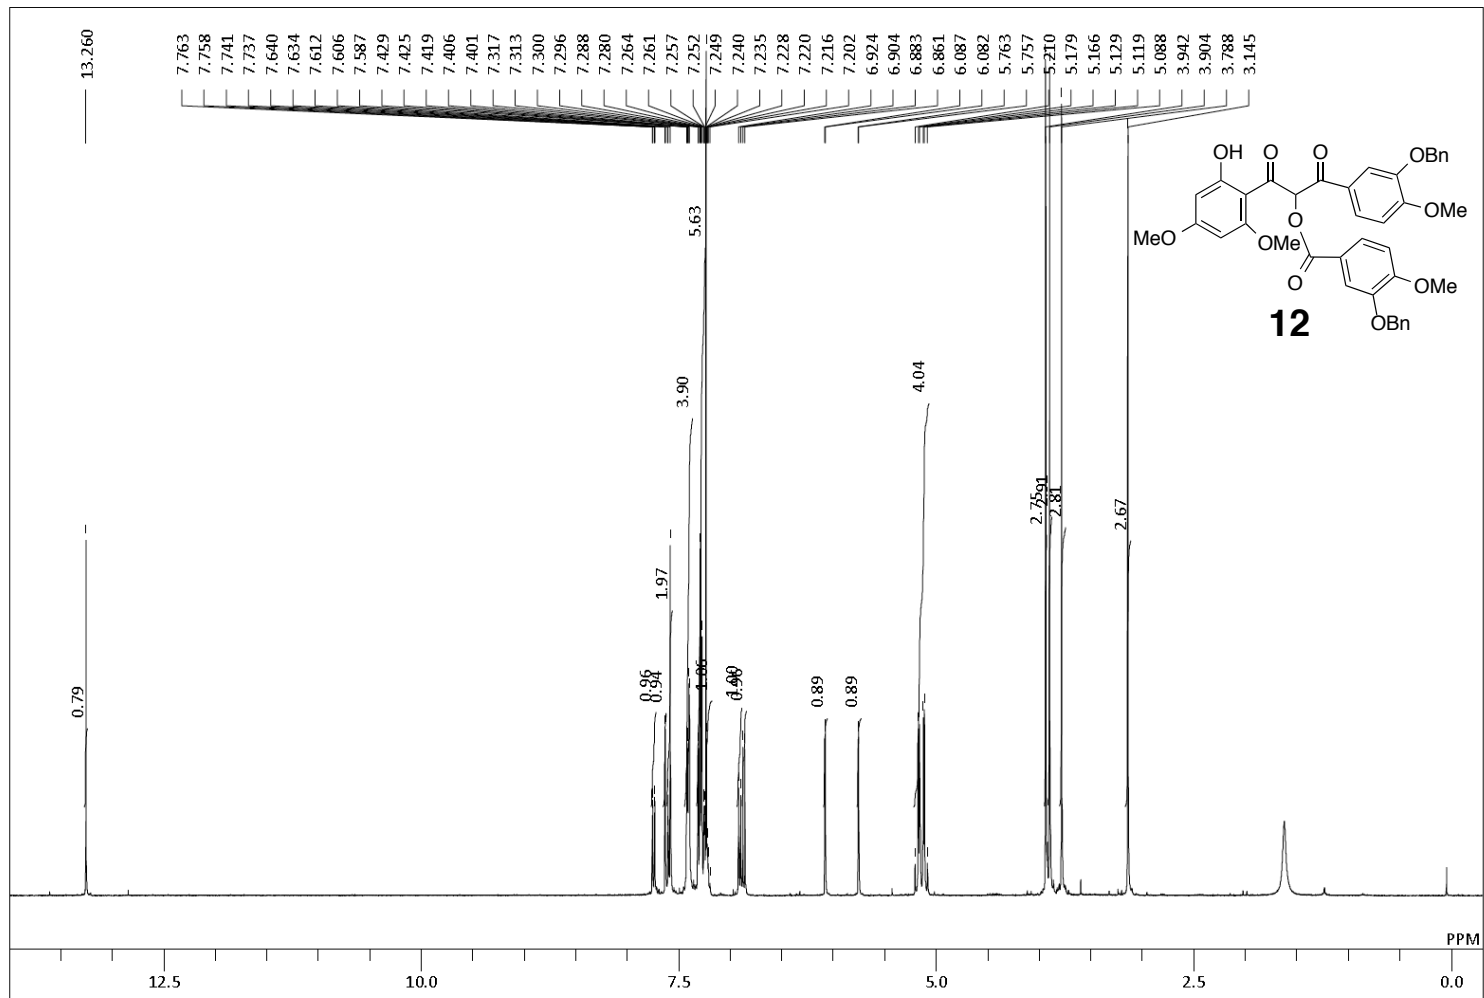



# Compound 12

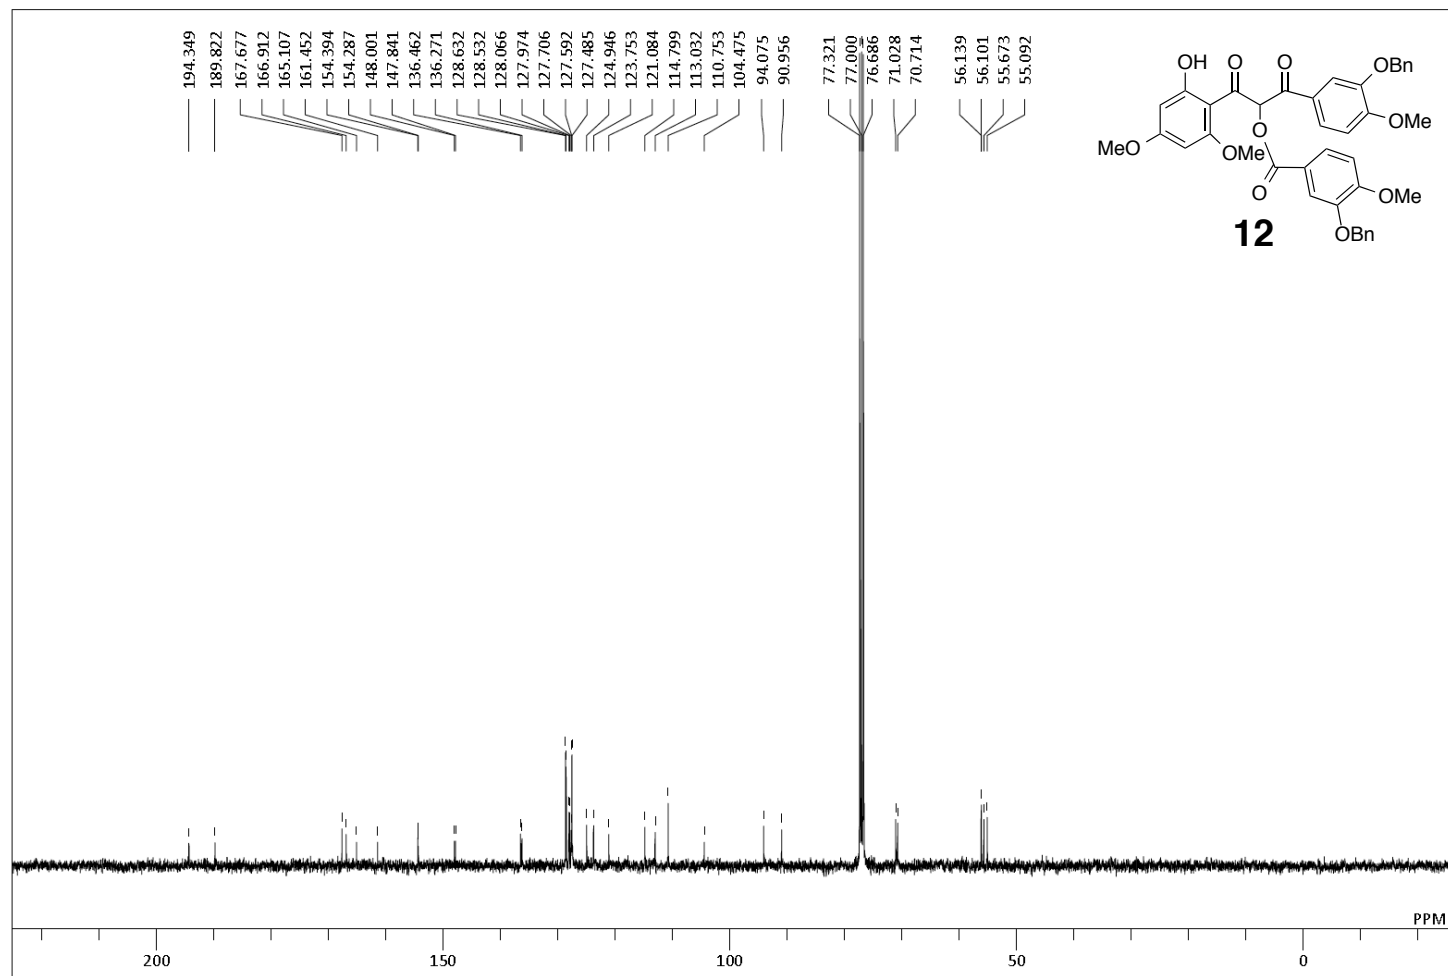

Compound 14

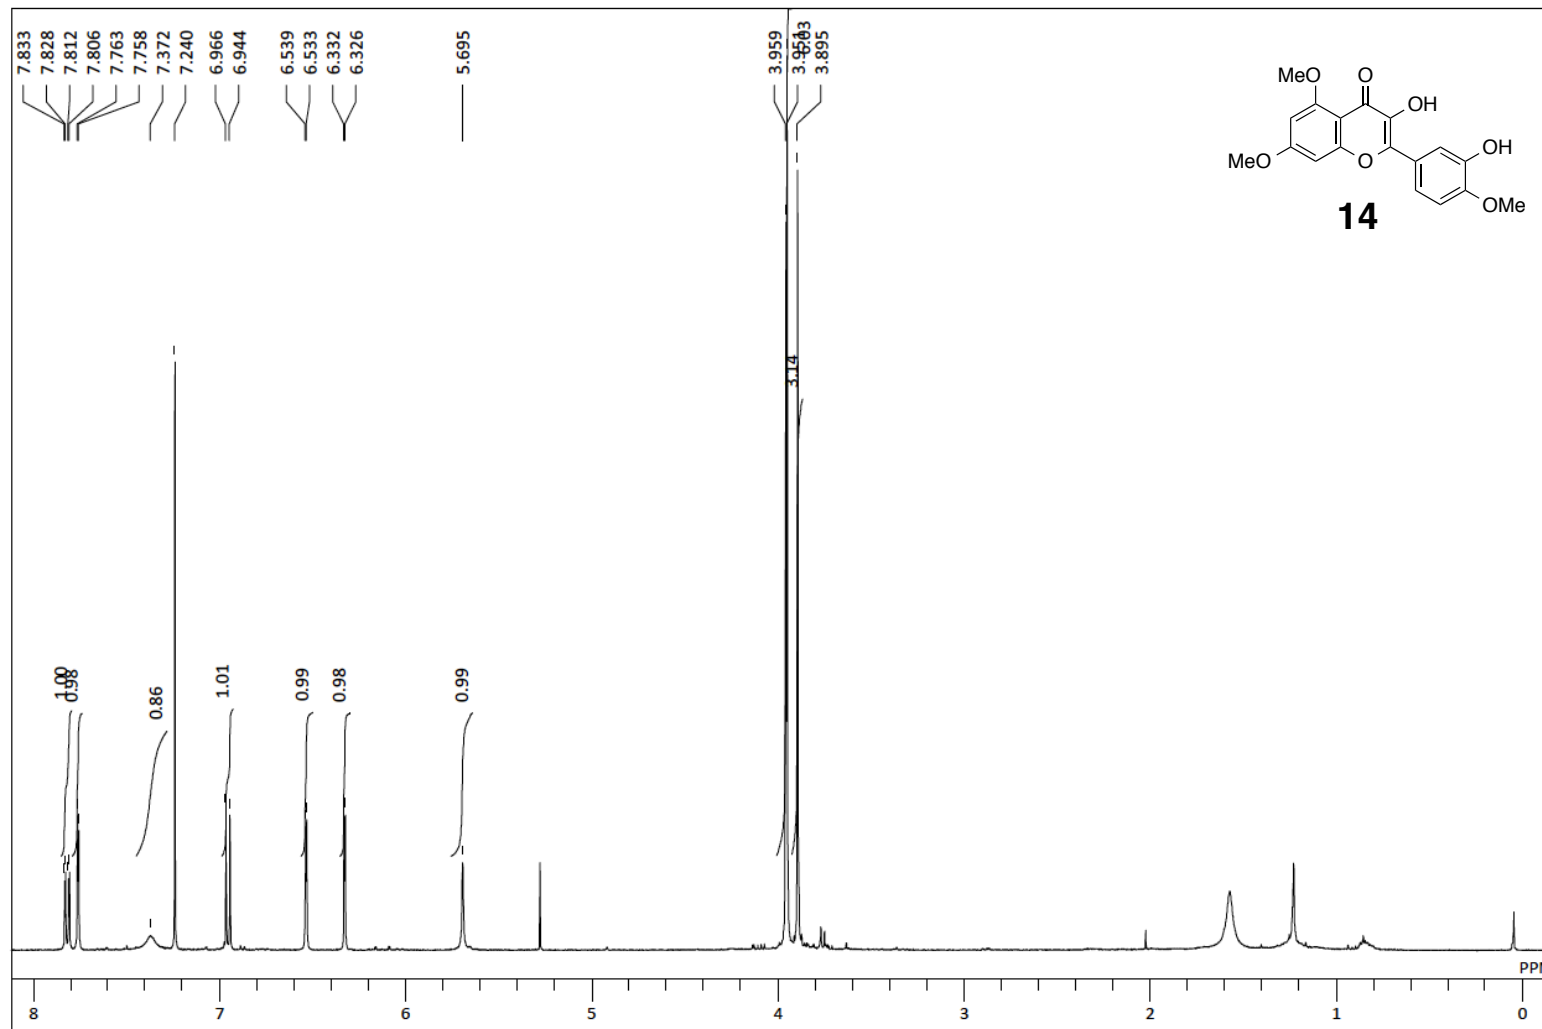

Compound 14

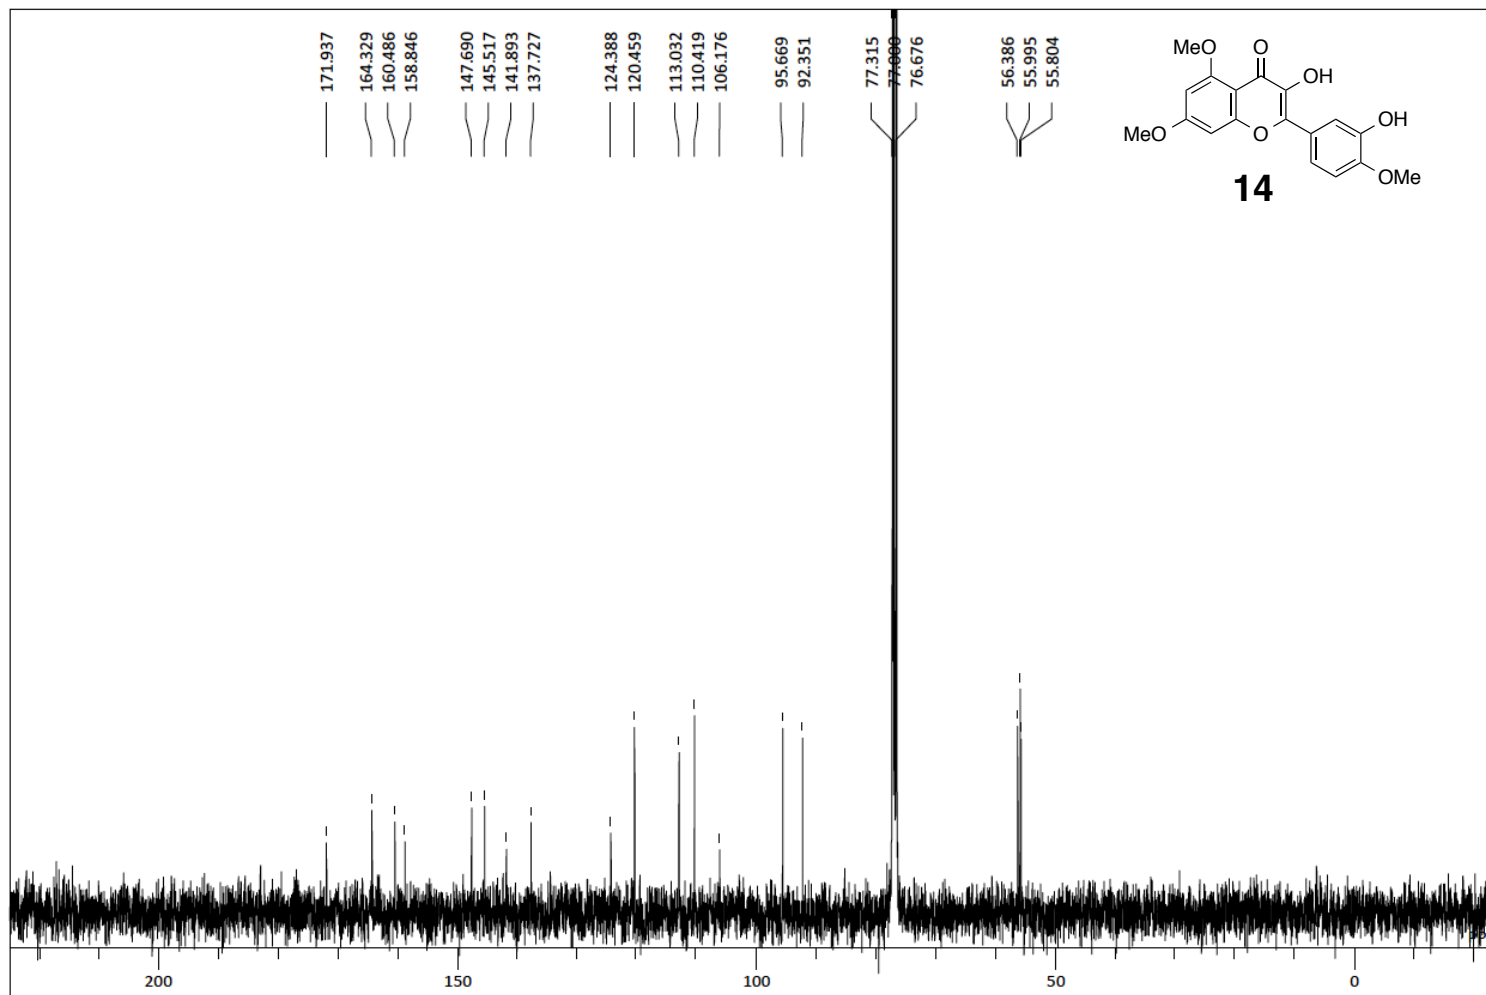

# Compound 5

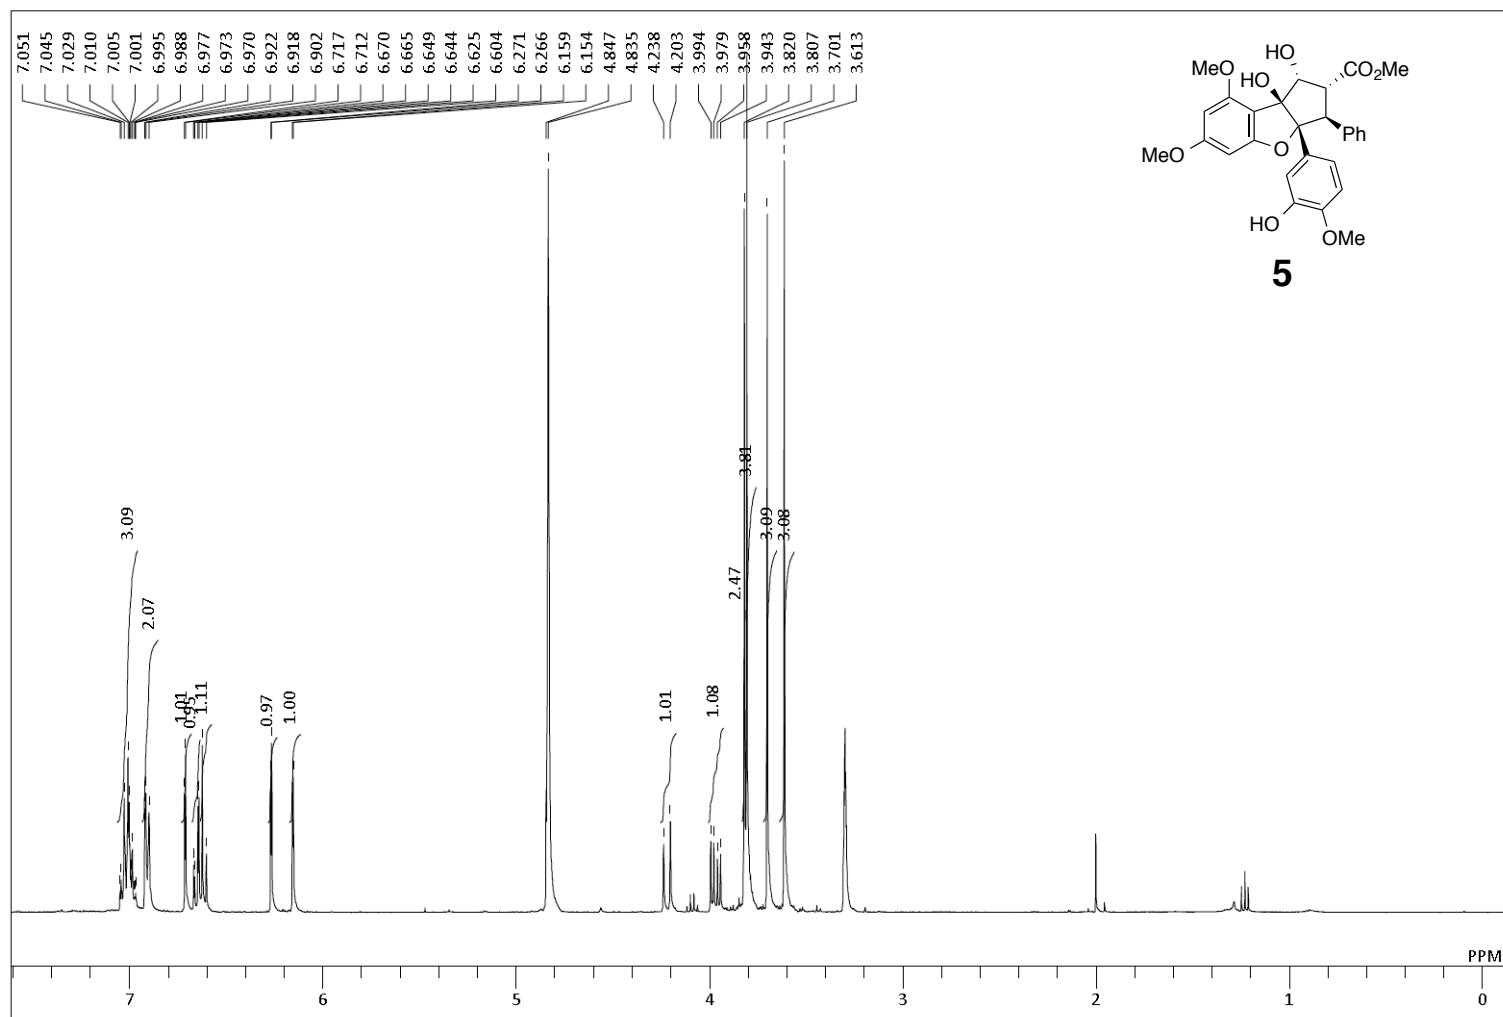

Compound 5

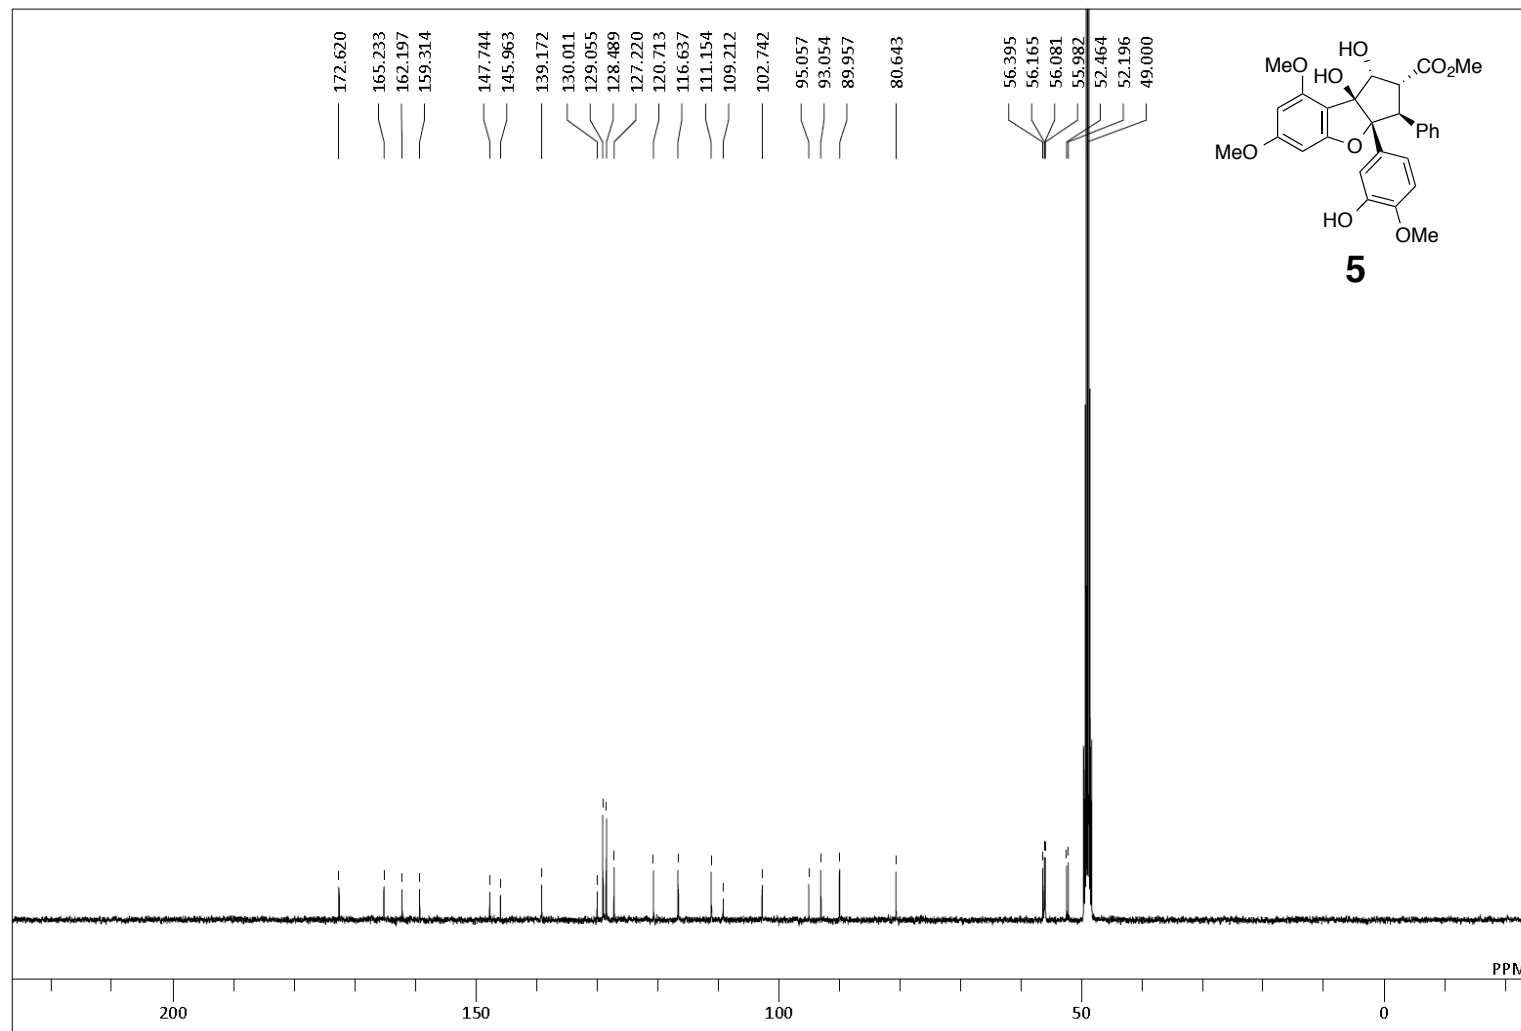

# Compound 4

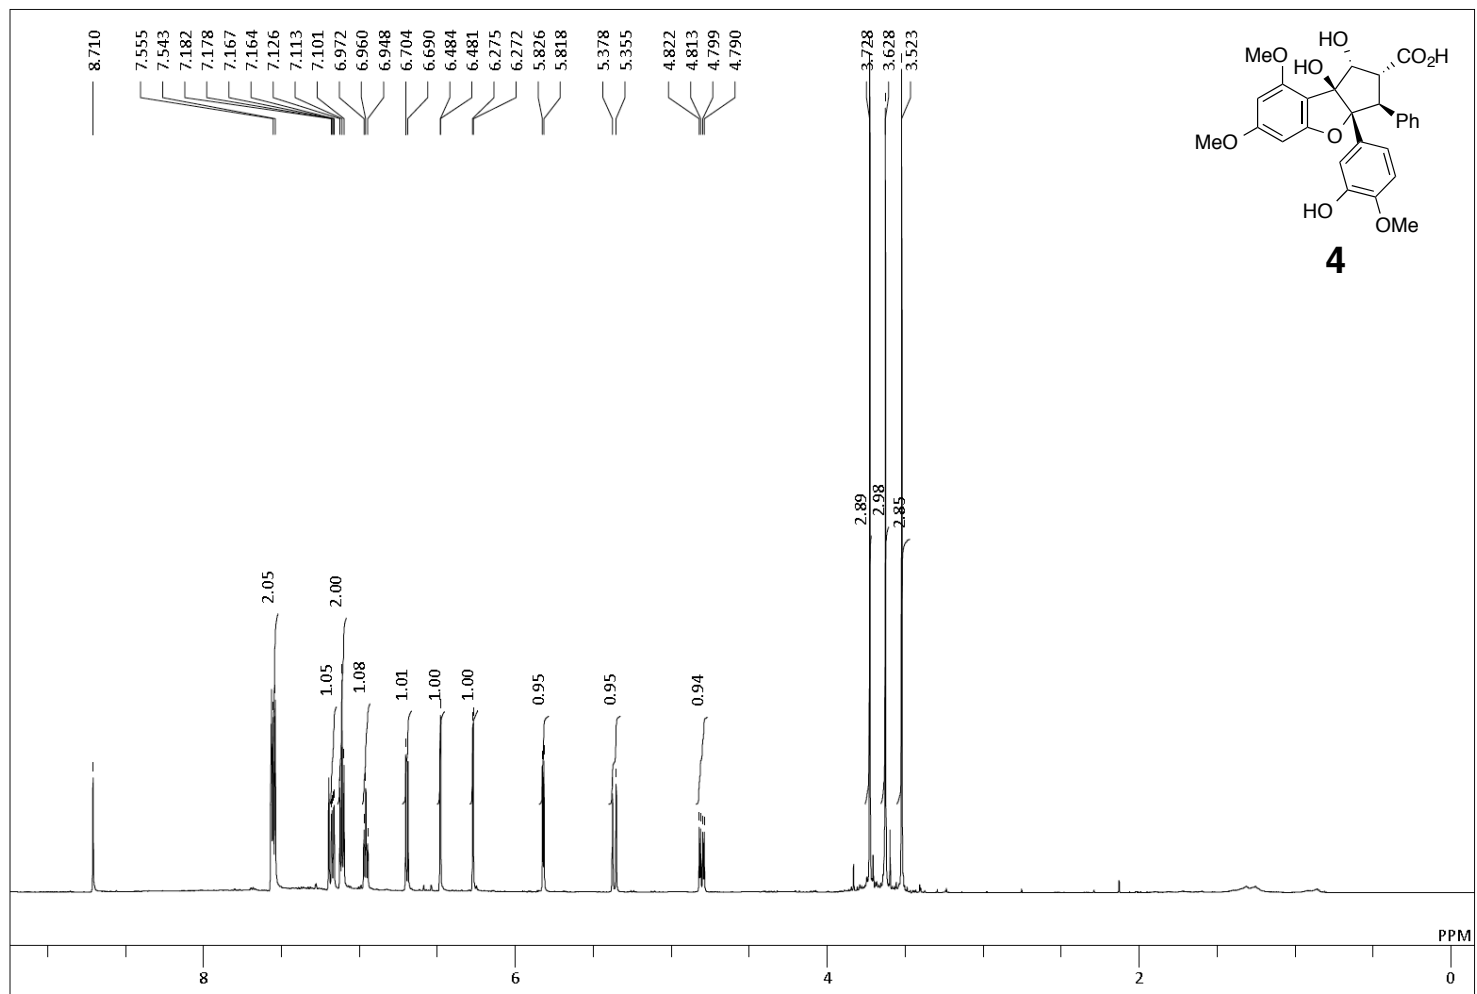

Compound 4

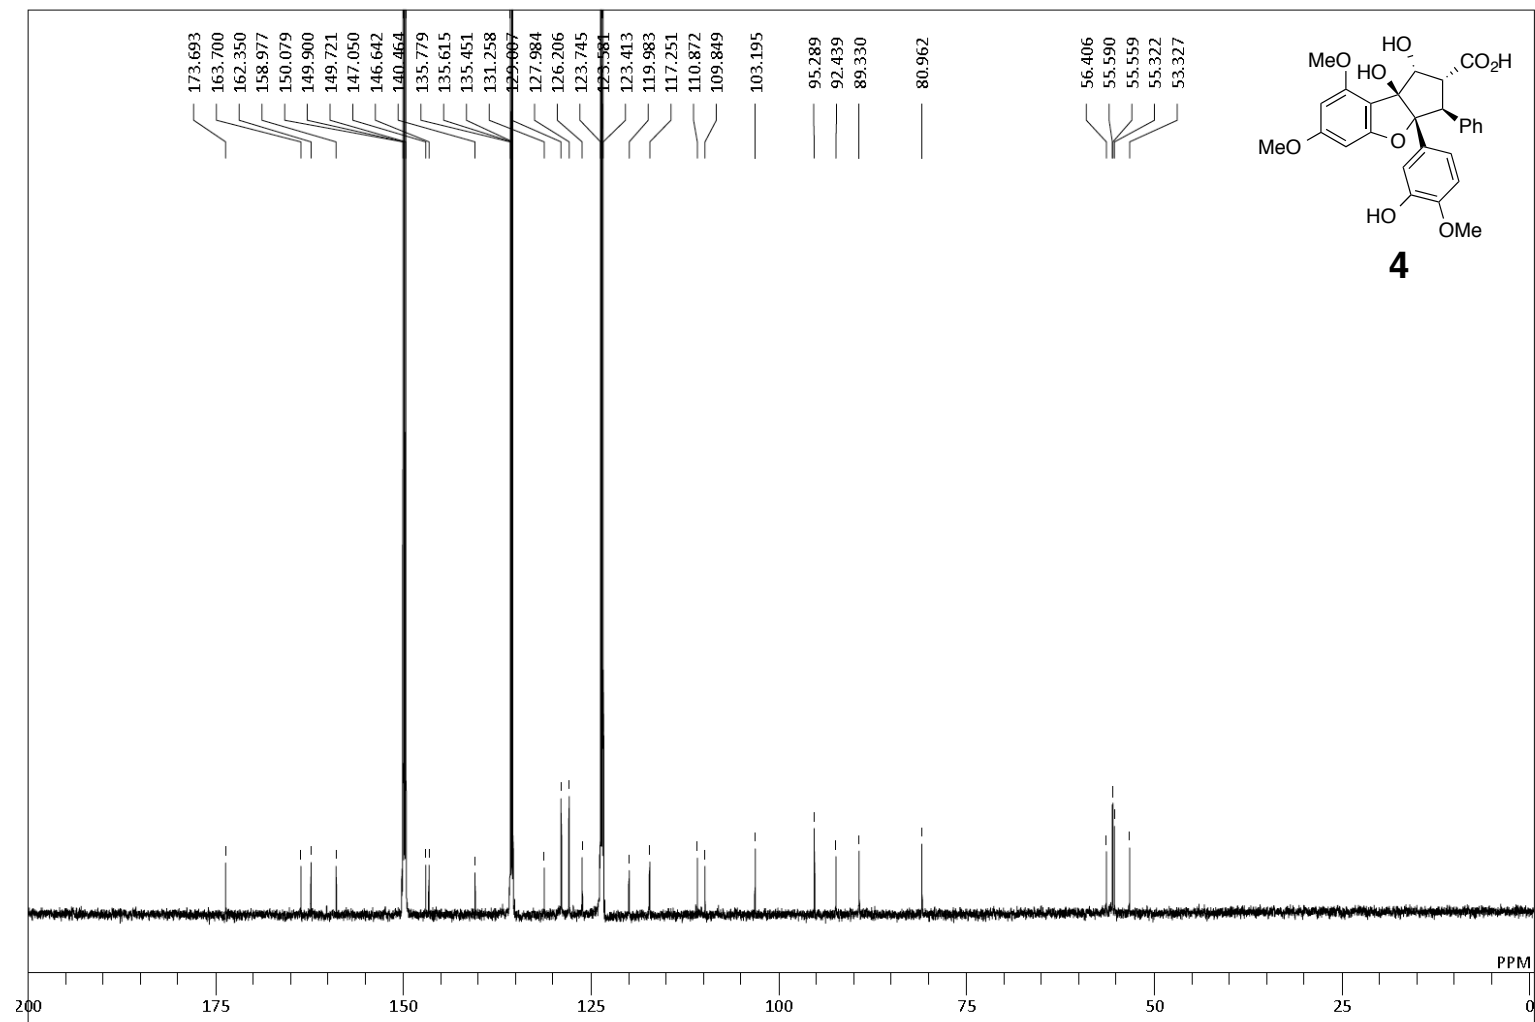

Compound 16a

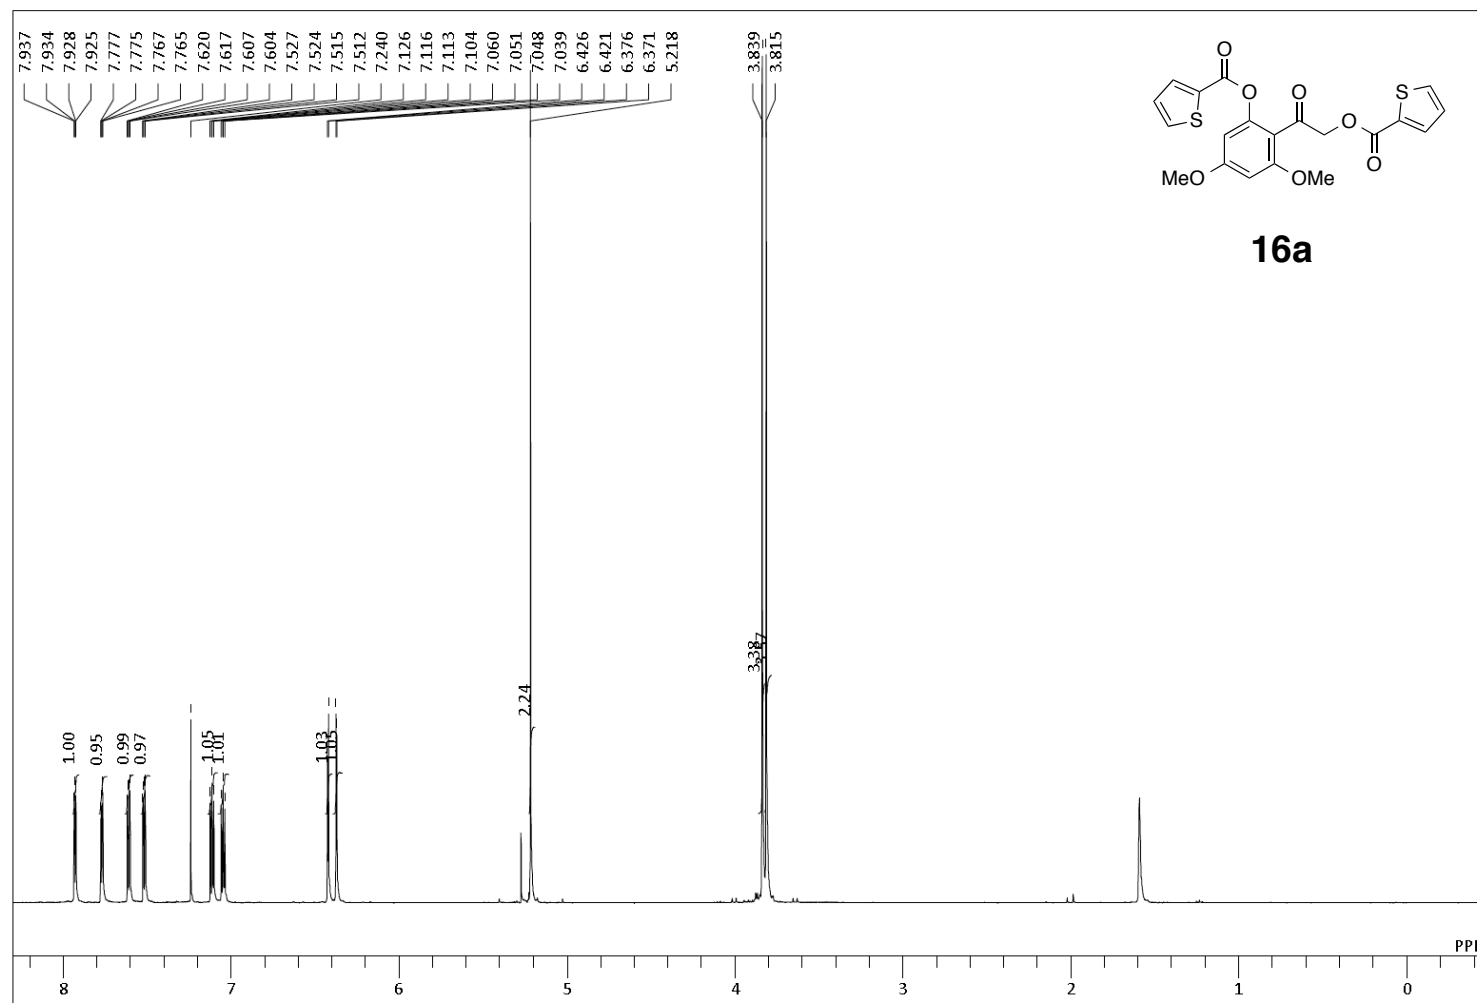



Compound 16a

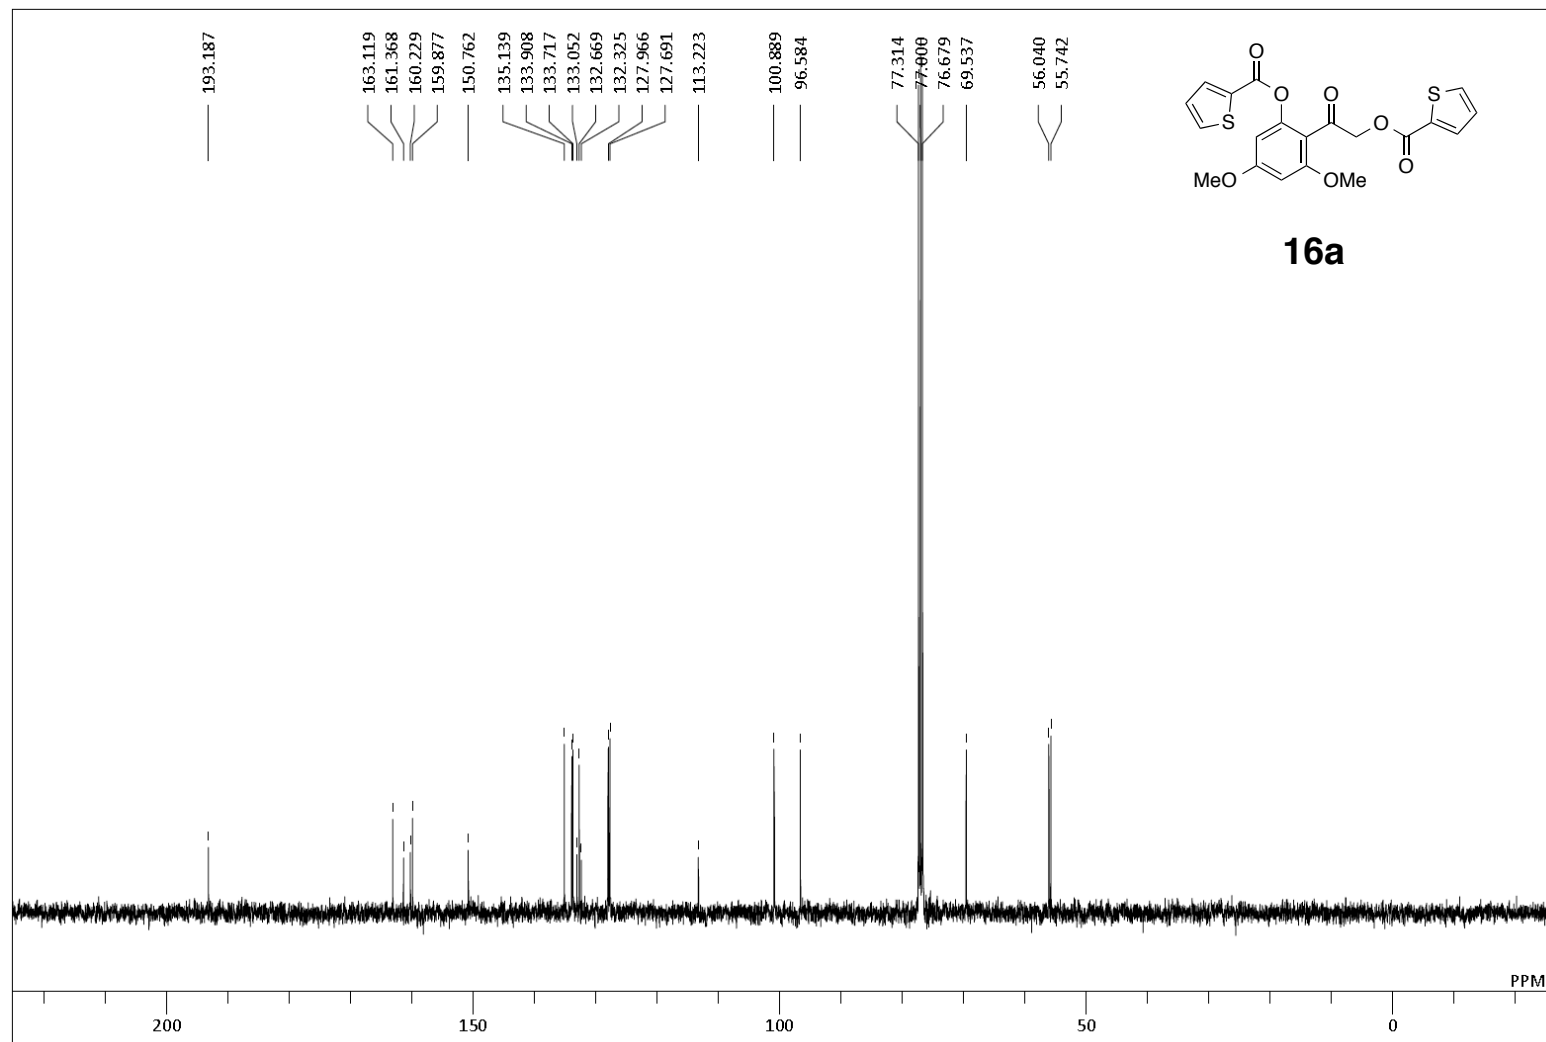

# Compound 16b

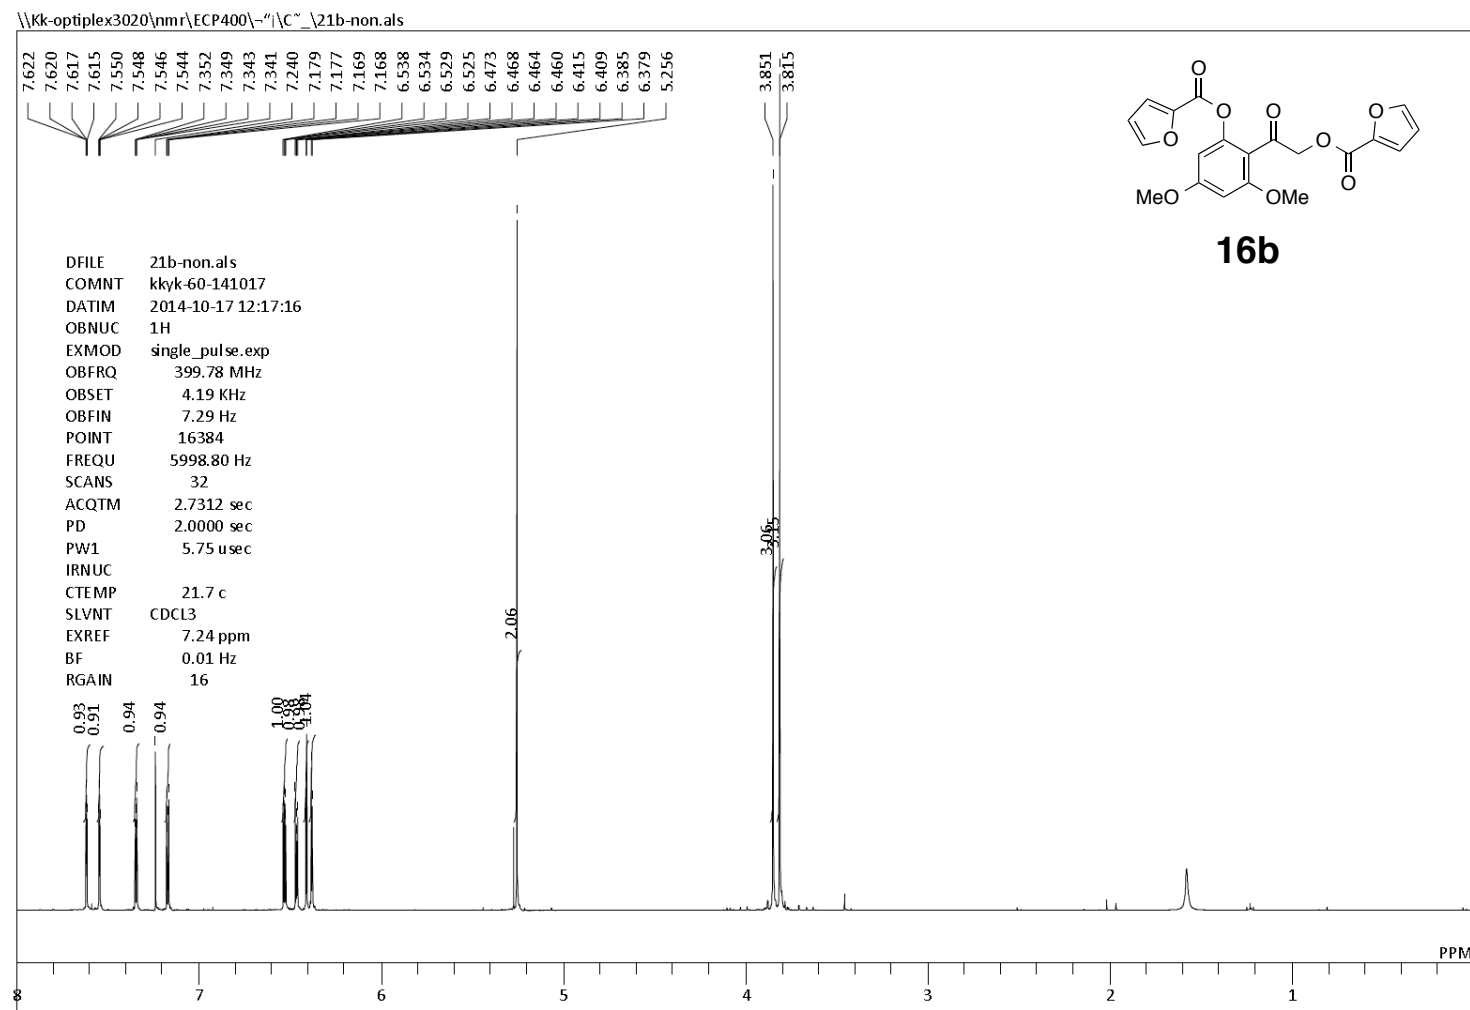

# Compound 16b

\\Kk-optiplex3020\nmr\ECP400\~"/\C~\\_21b-bcm.als

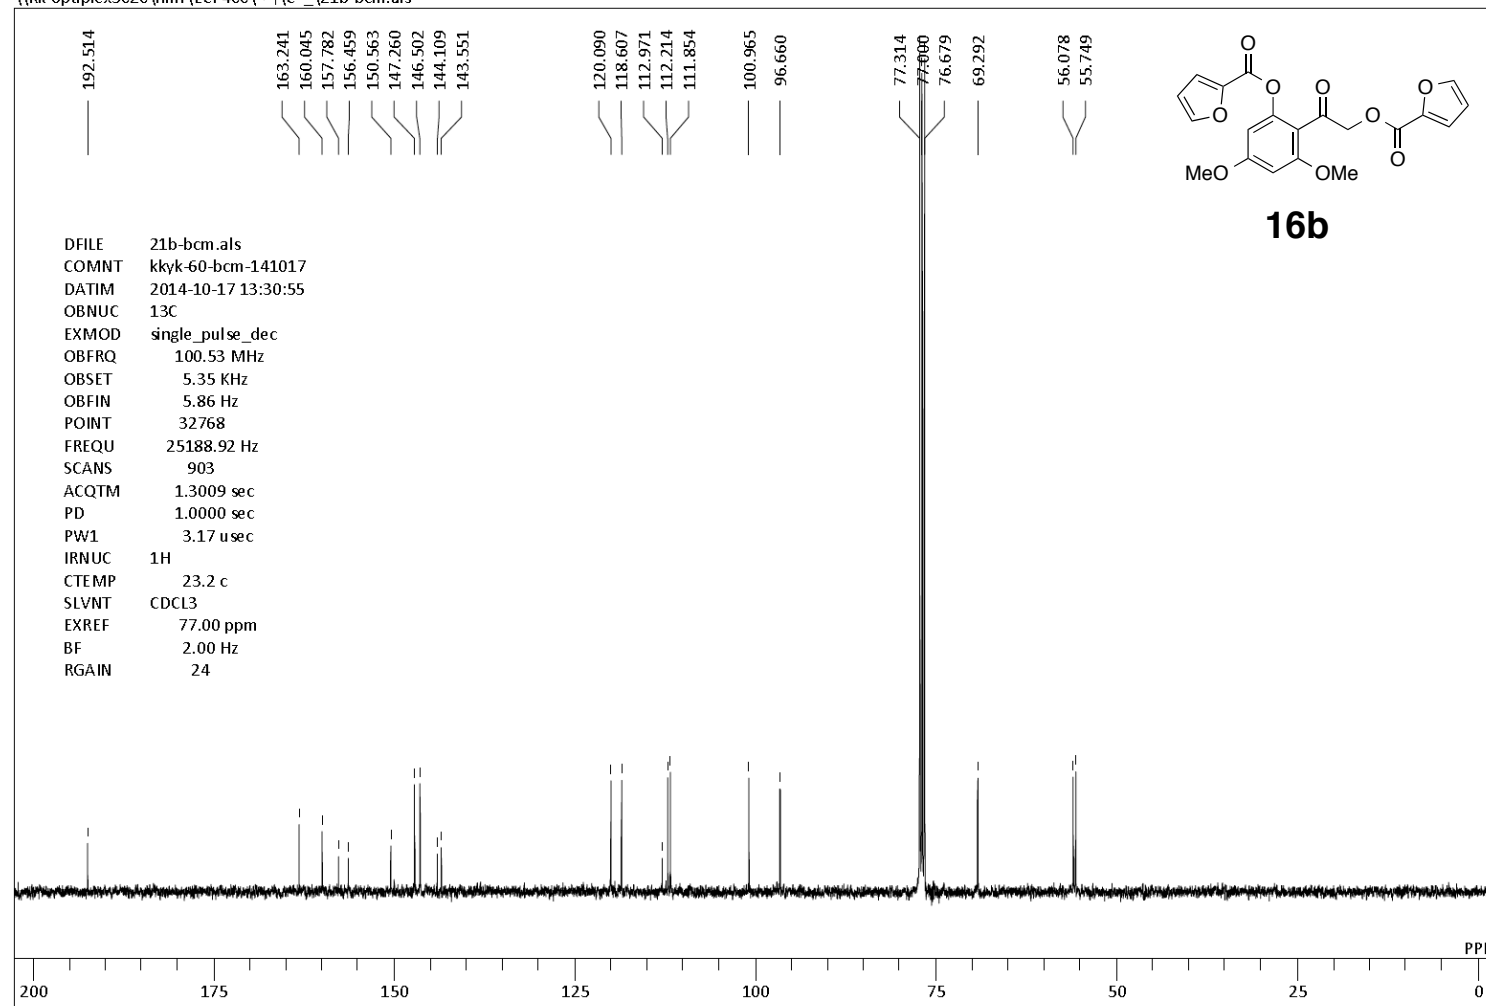

# Compound 16c

Z:\NMR\ECP400\c+-D\ZACE+1\kkyt-1-24-frc14-19.als

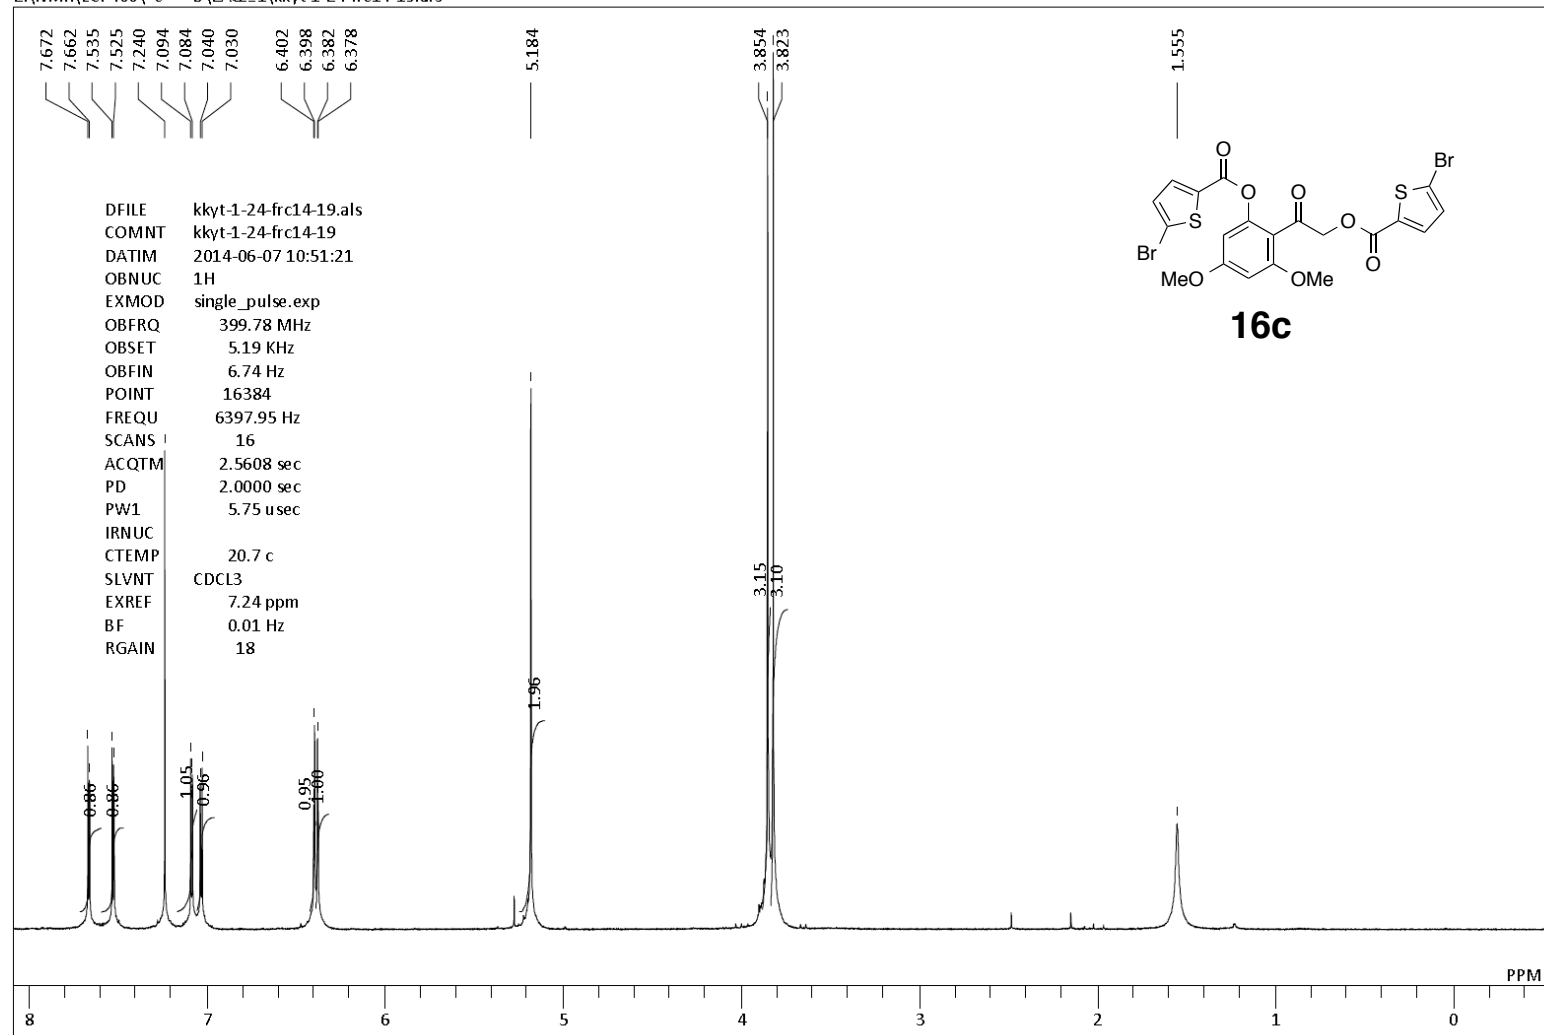

# Compound 16c

Z:\NMR\ECS400\c+f-DcM\kkyt-3-20-0405\_Carbon\_ft-1-1.als

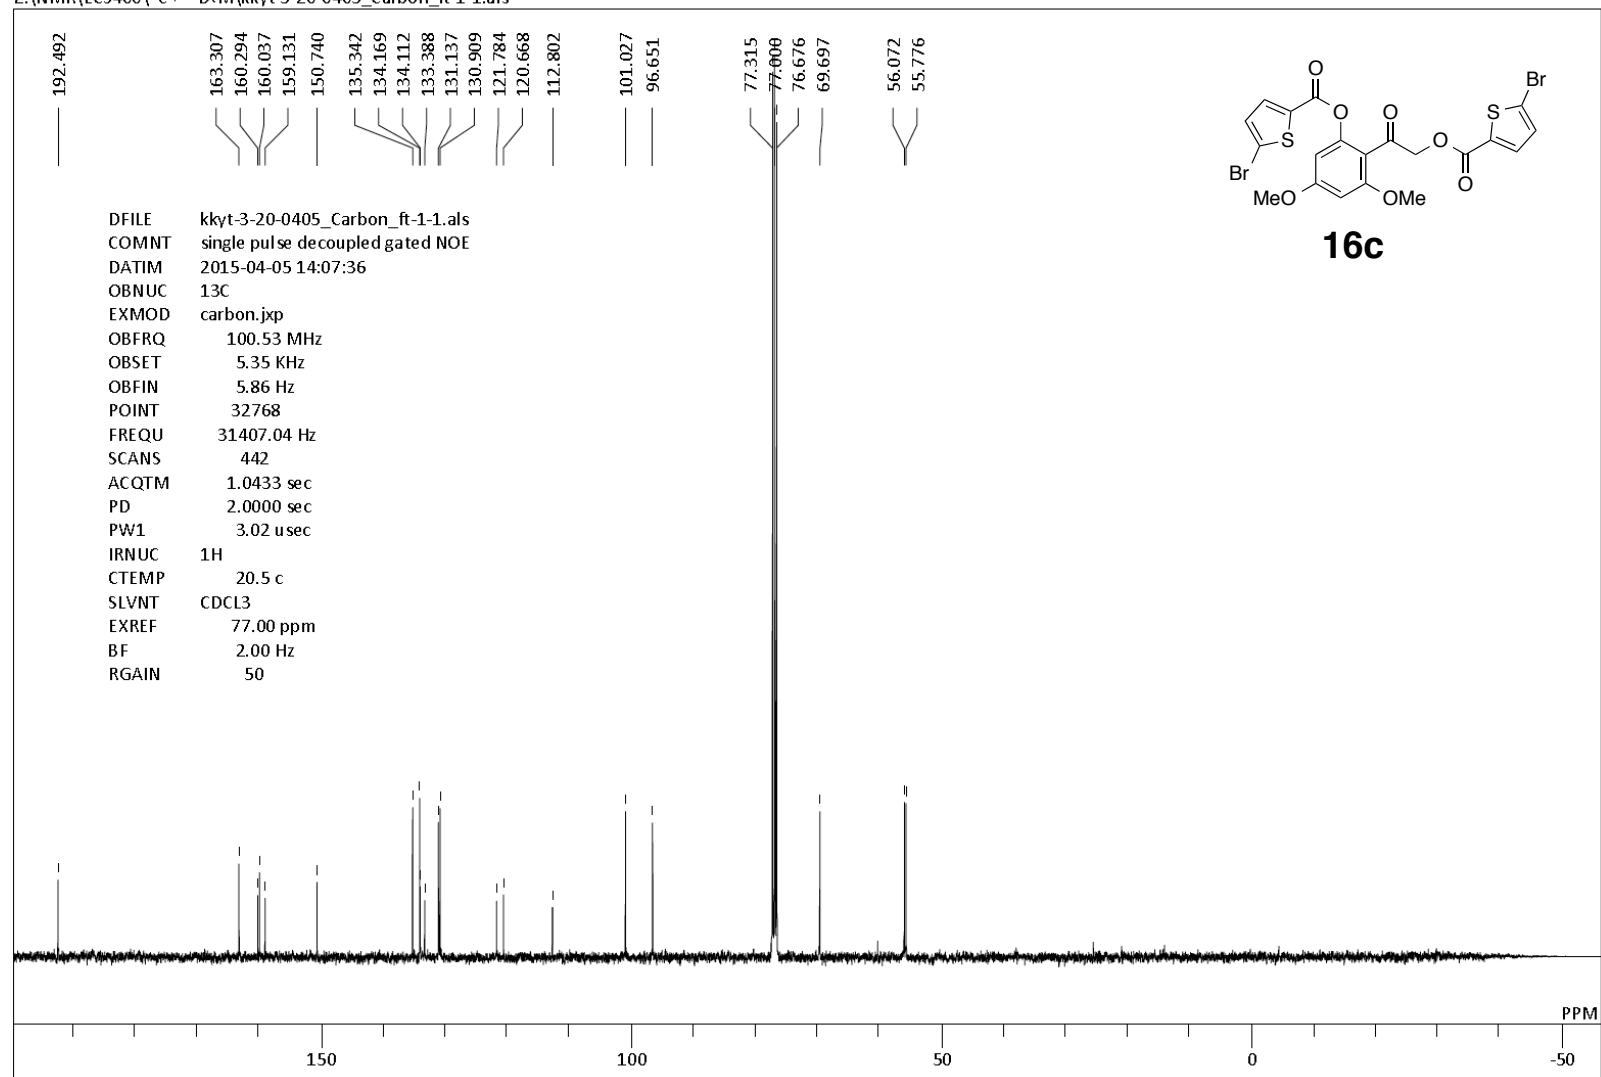



# Compound 16d

\\Kk-optiplex3020\nmr\ECP400\-\1\C~\21c-bcm.als

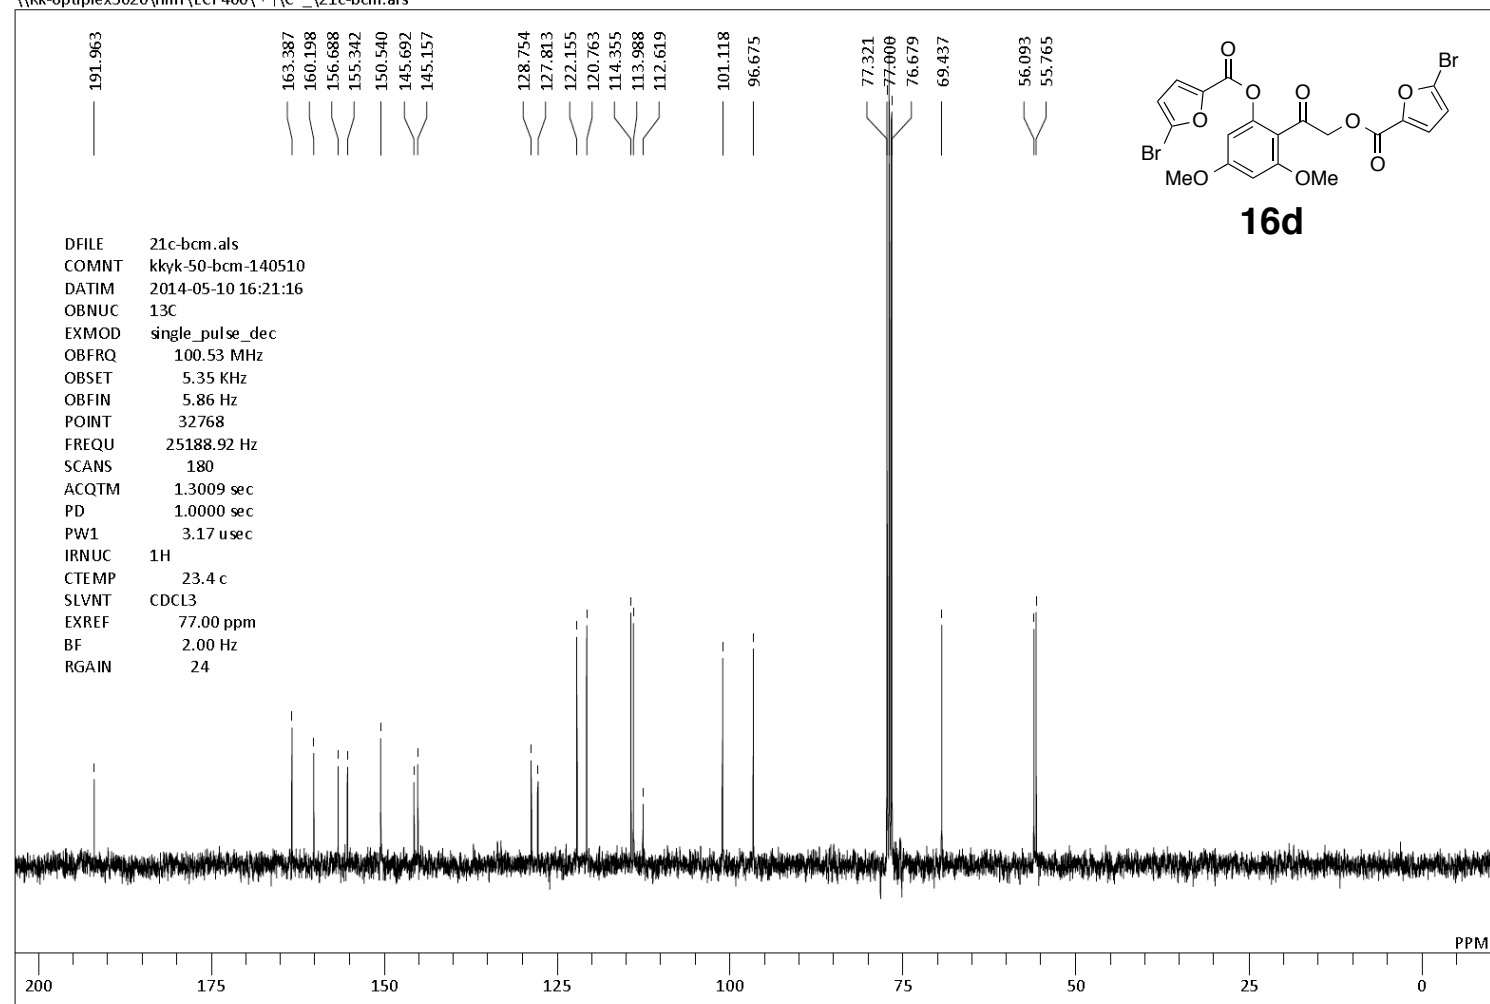

# Compound 17a

\\Kk-optiplex3020\nmr\ECP400\-\C\22a-non.als

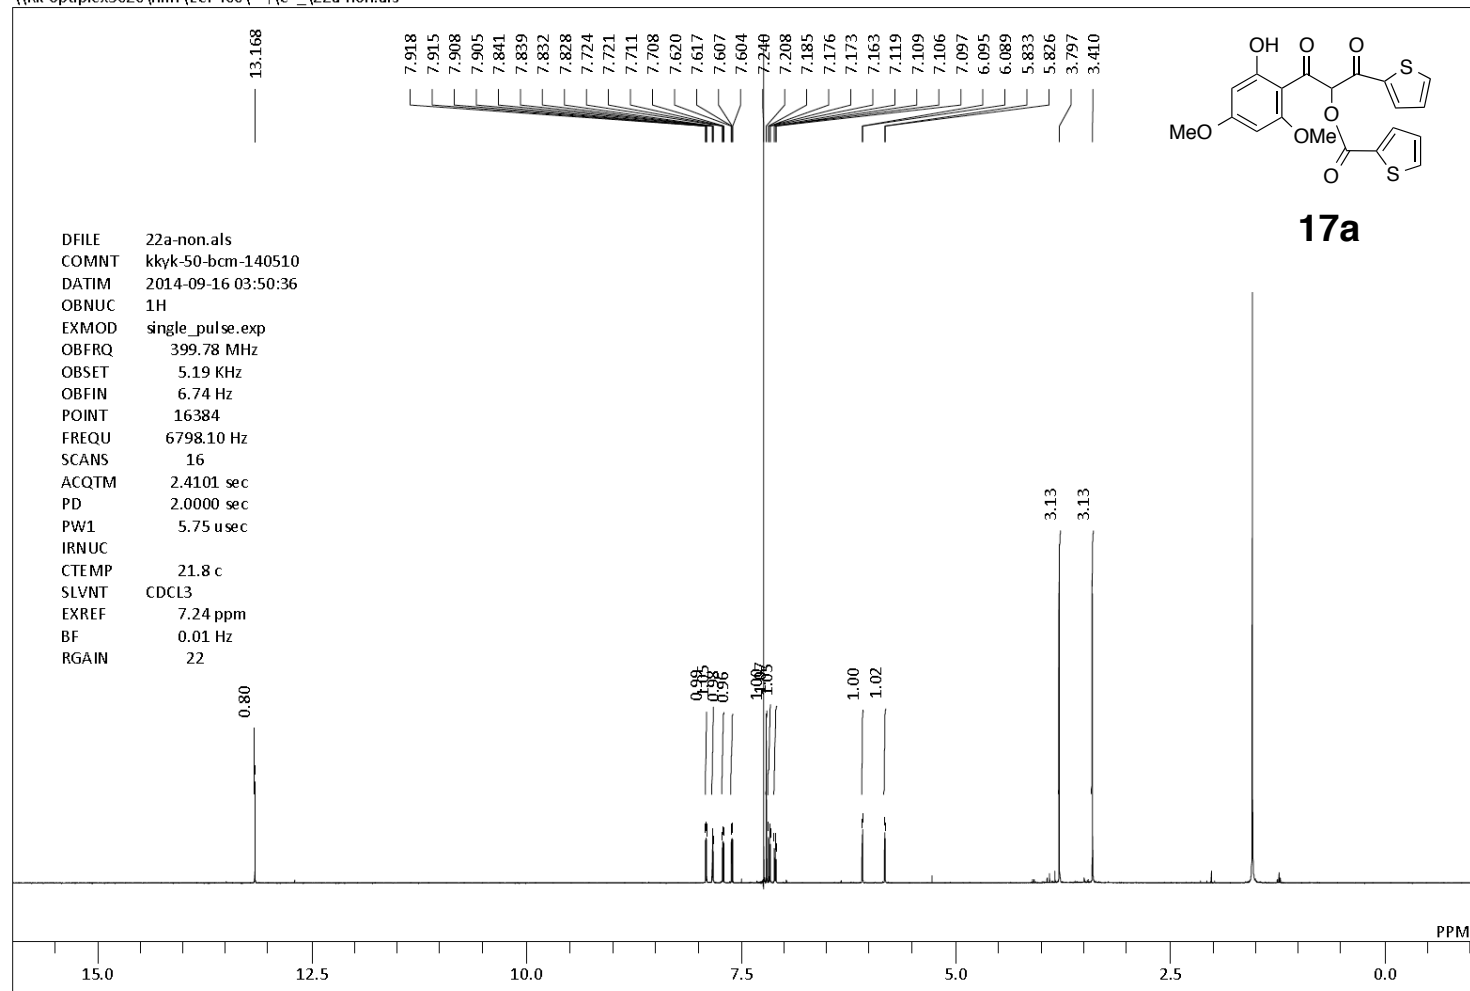



# Compound 17a

\\Kk-optiplex3020\nmr\ECP400\~\i\C\_\22a-bcm.als

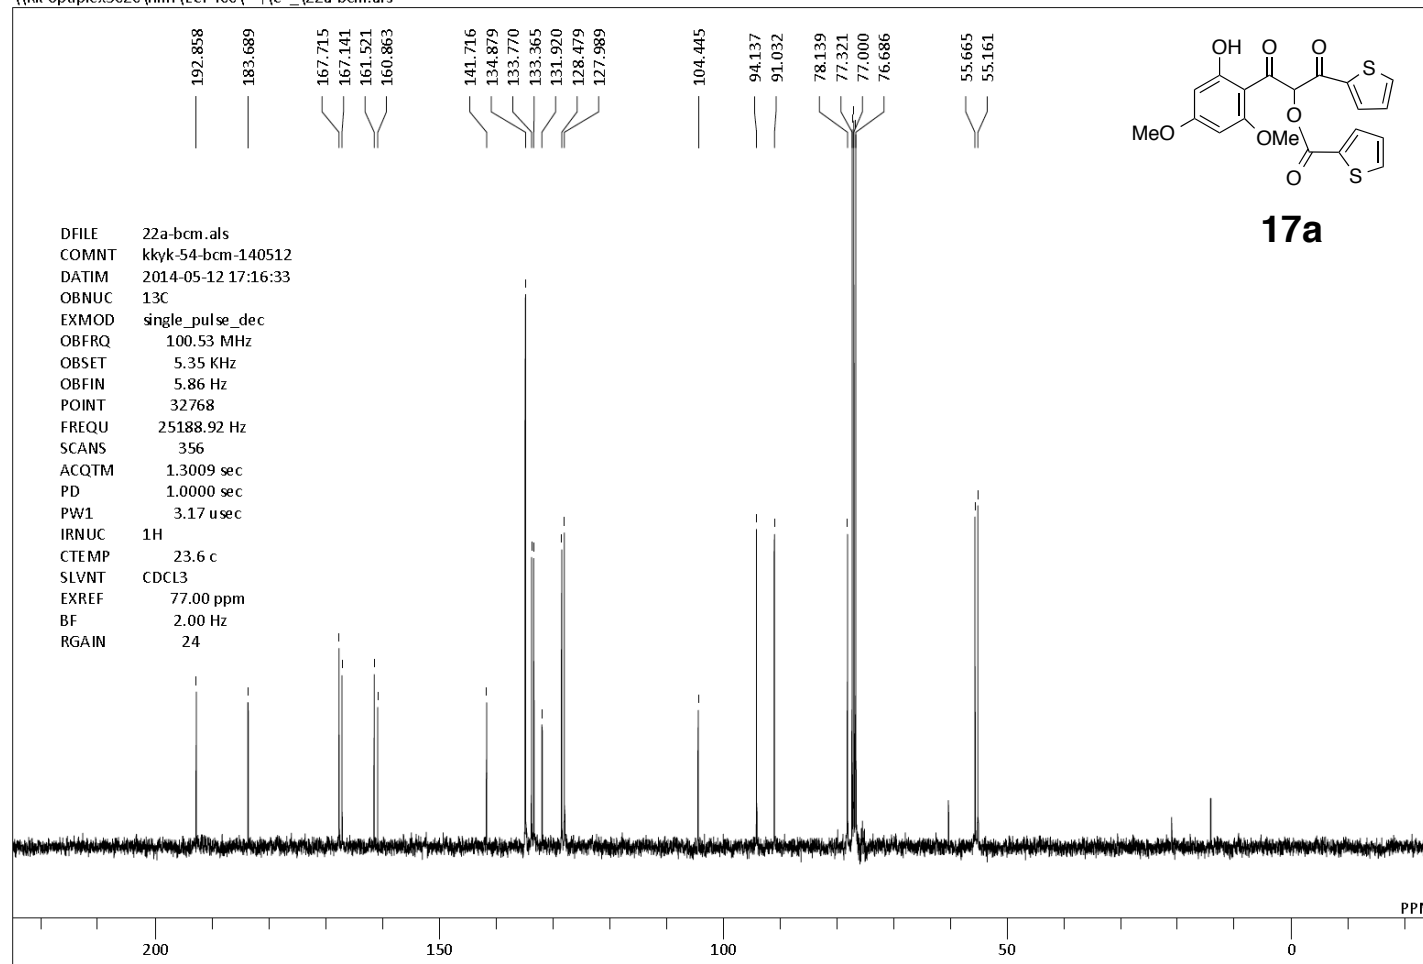

# Compound 17b

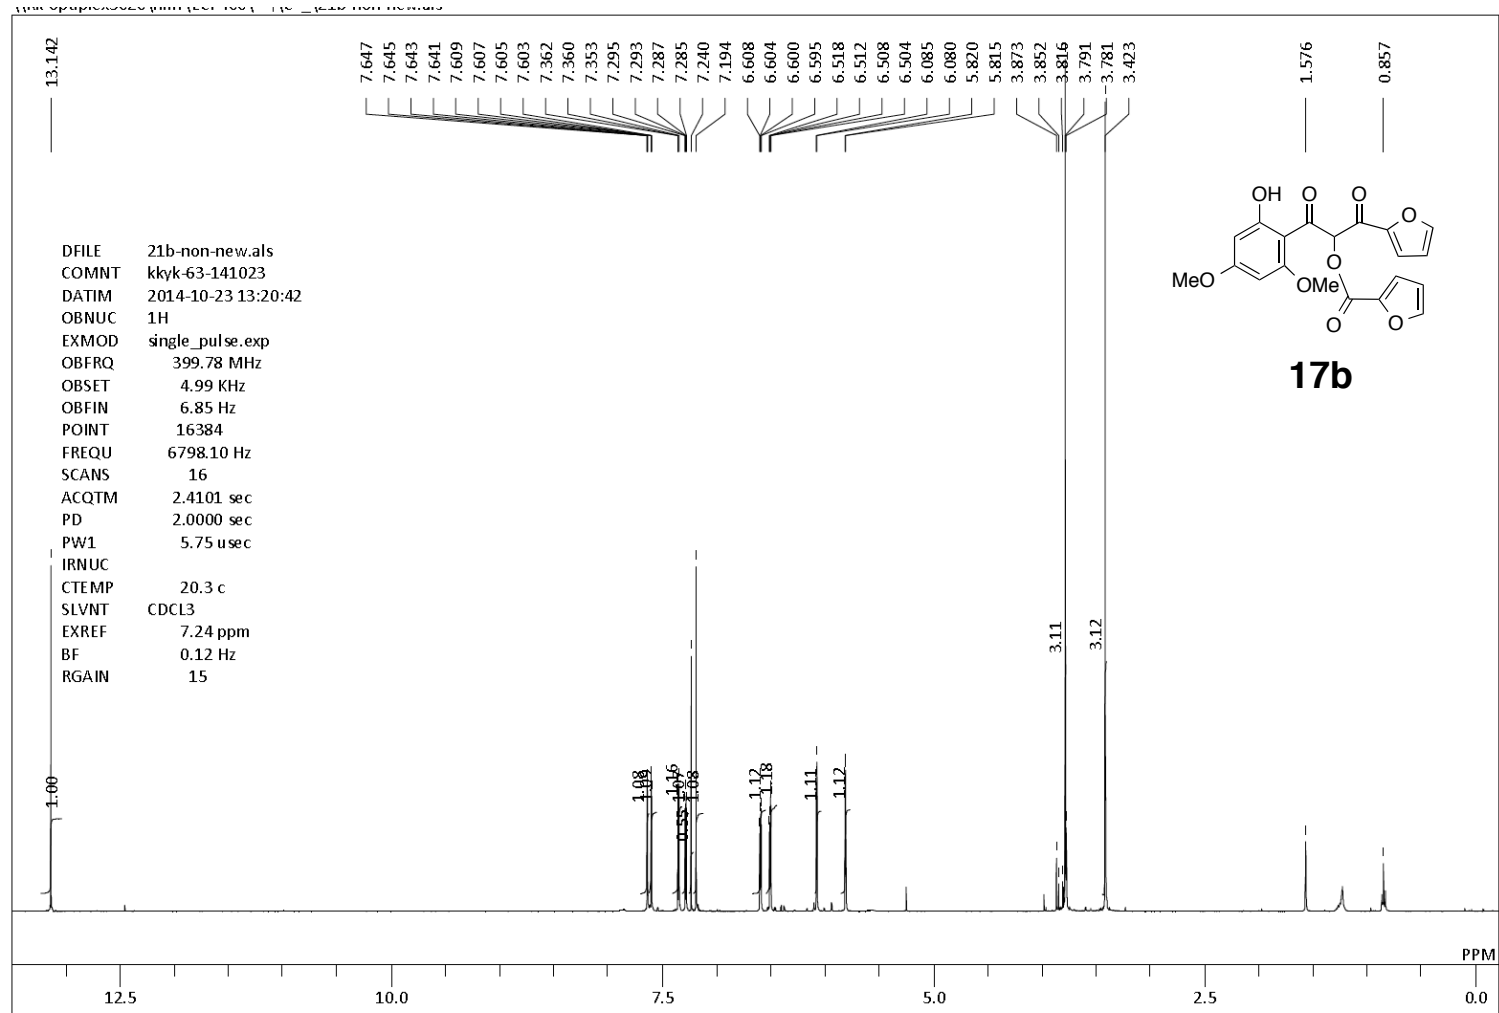

# Compound 17b

\\Kk-optiplex3020\nmr\ECP400\--"i\C\_22b-bcm.als

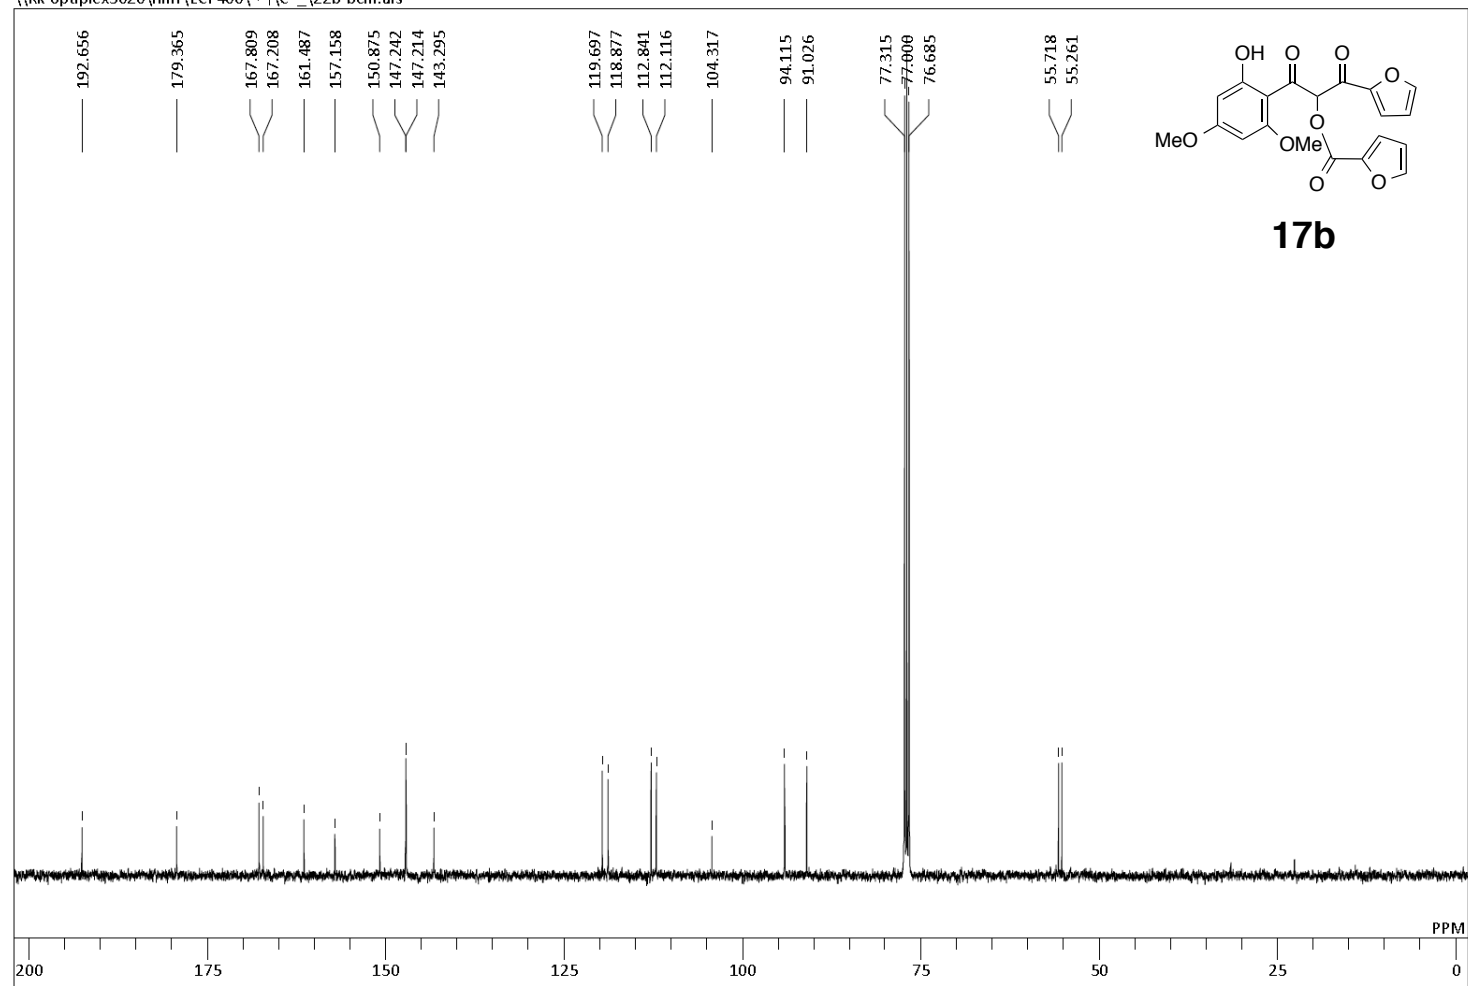

# Compound 17c

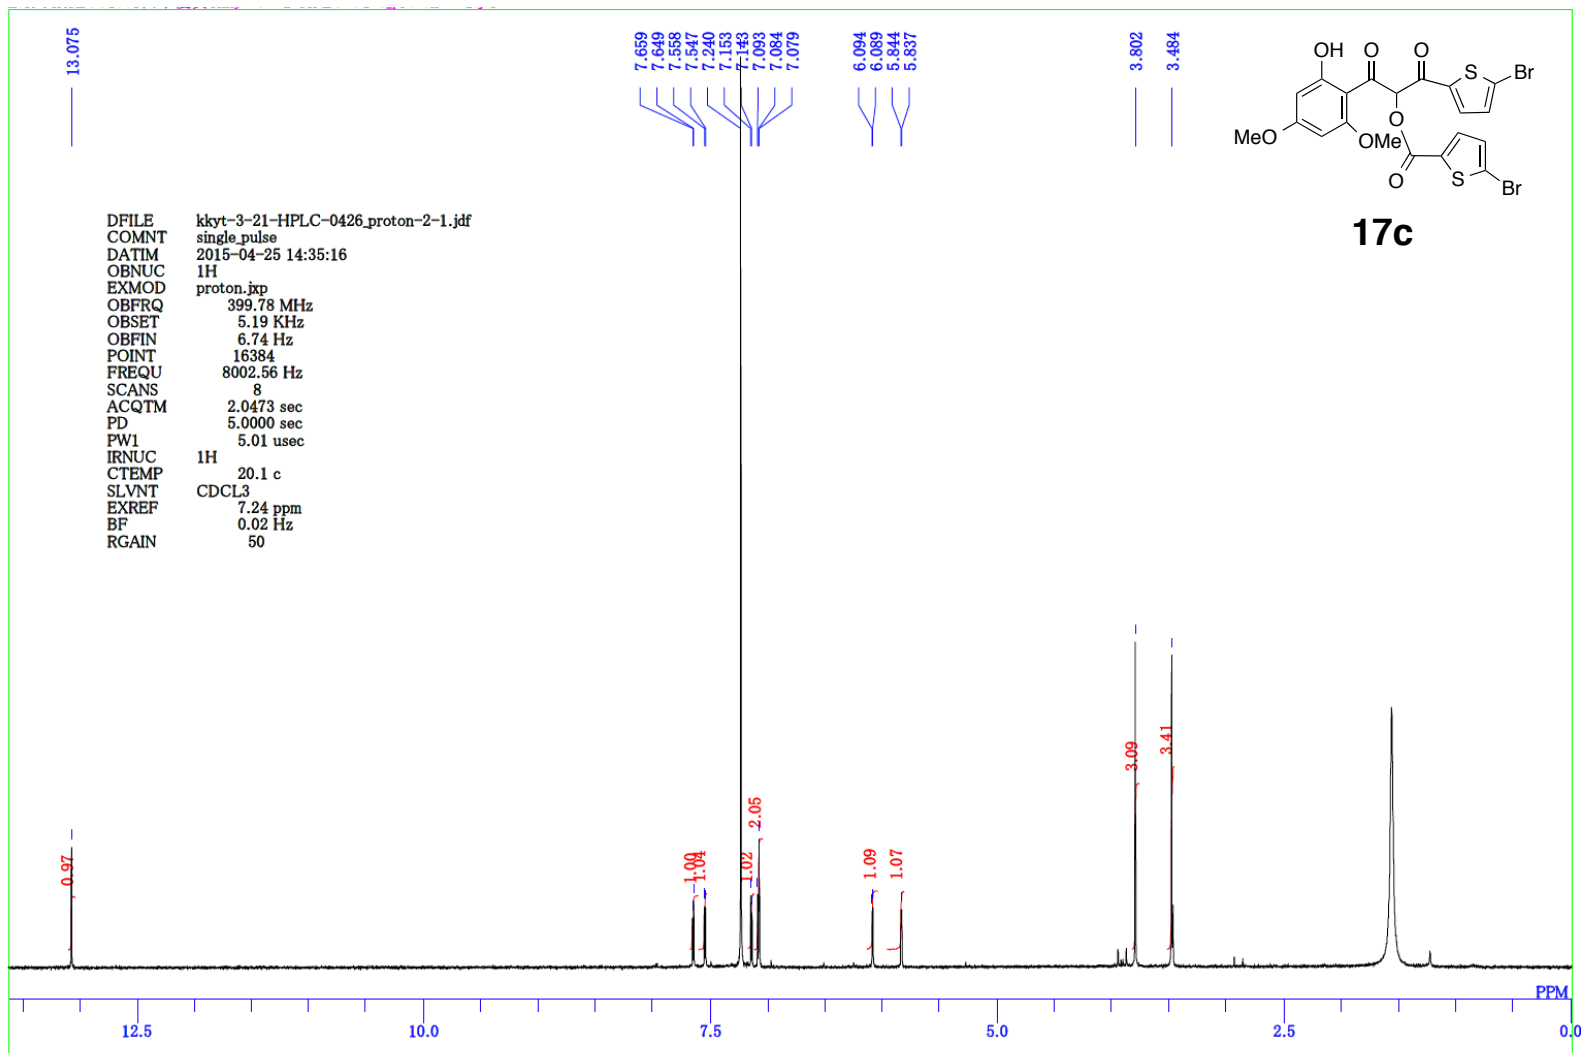

# Compound 17c

Z:\NMR\ECS400\c'+-DcM\kkyt-3-21-0408\_Carbon\_ft-1-1.als

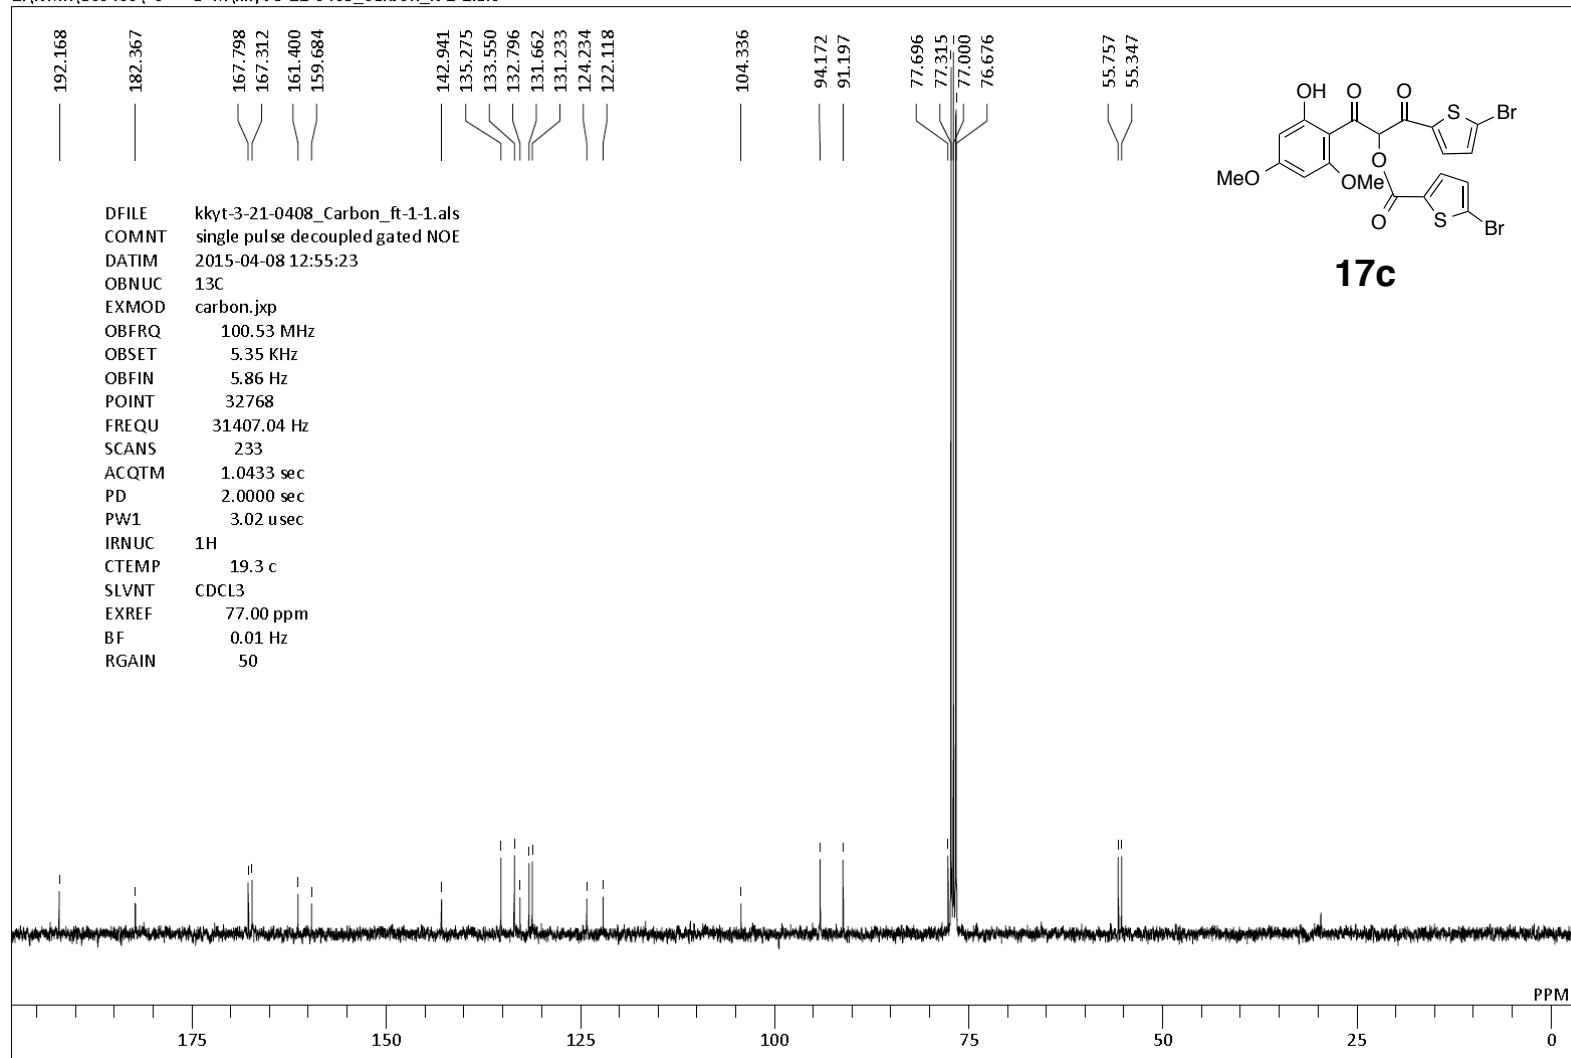

# Compound 17d

\\Kk-optiplex3020\nmr\ECP400\~\i\C~\22c-non.als

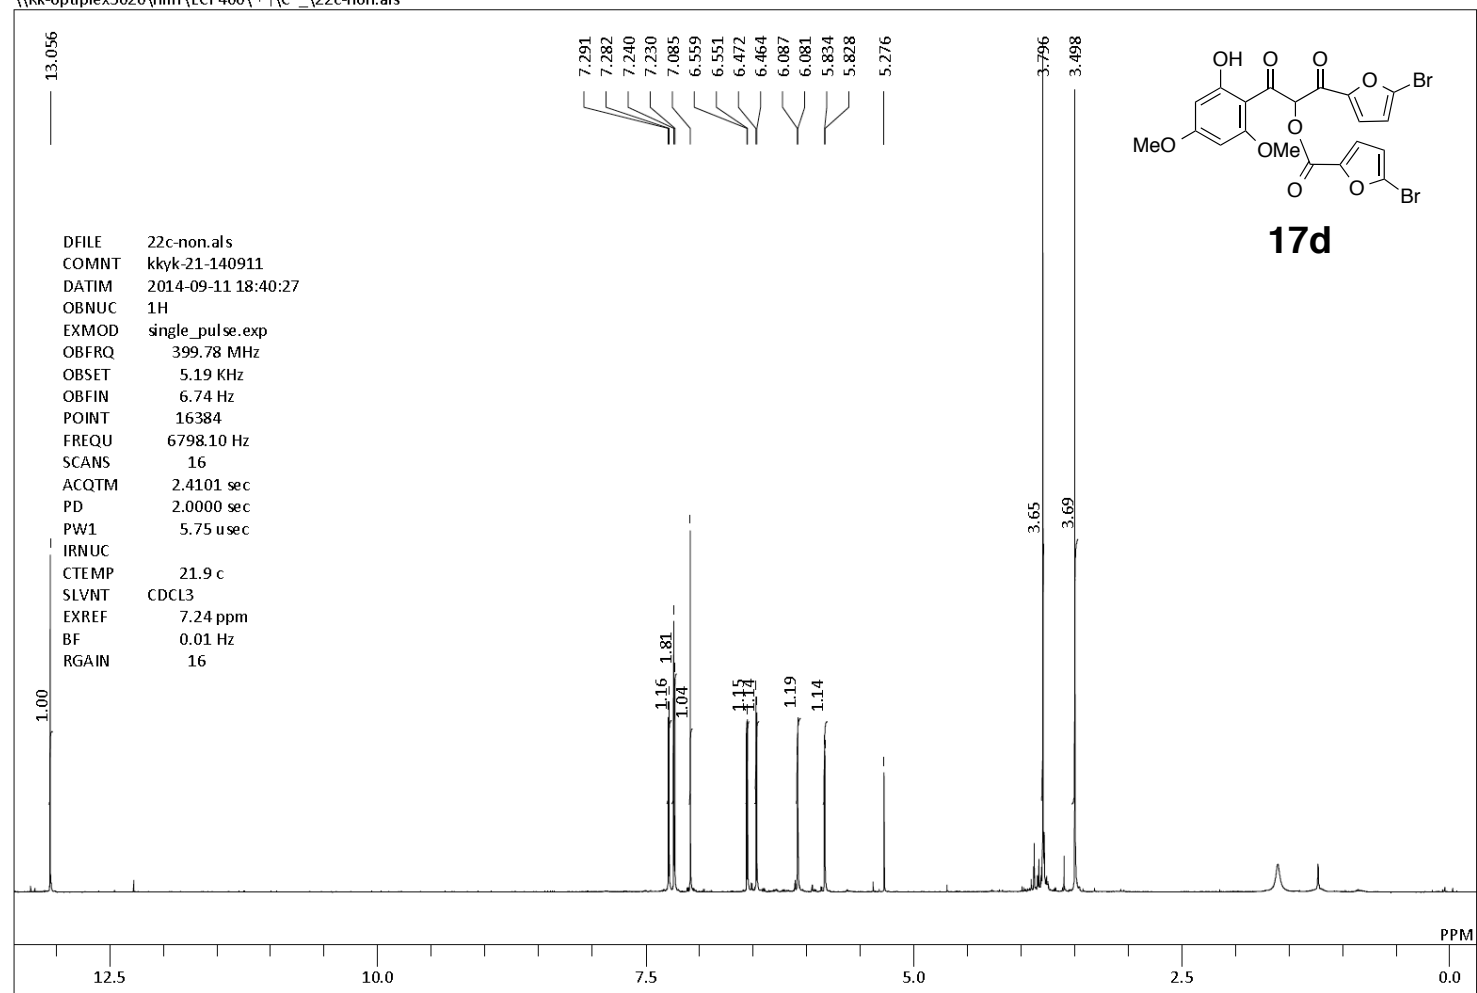

# Compound 17d

\\Kk-optiplex3020\nmr\ECP400\-\f\C\*\_22c-bcm.als

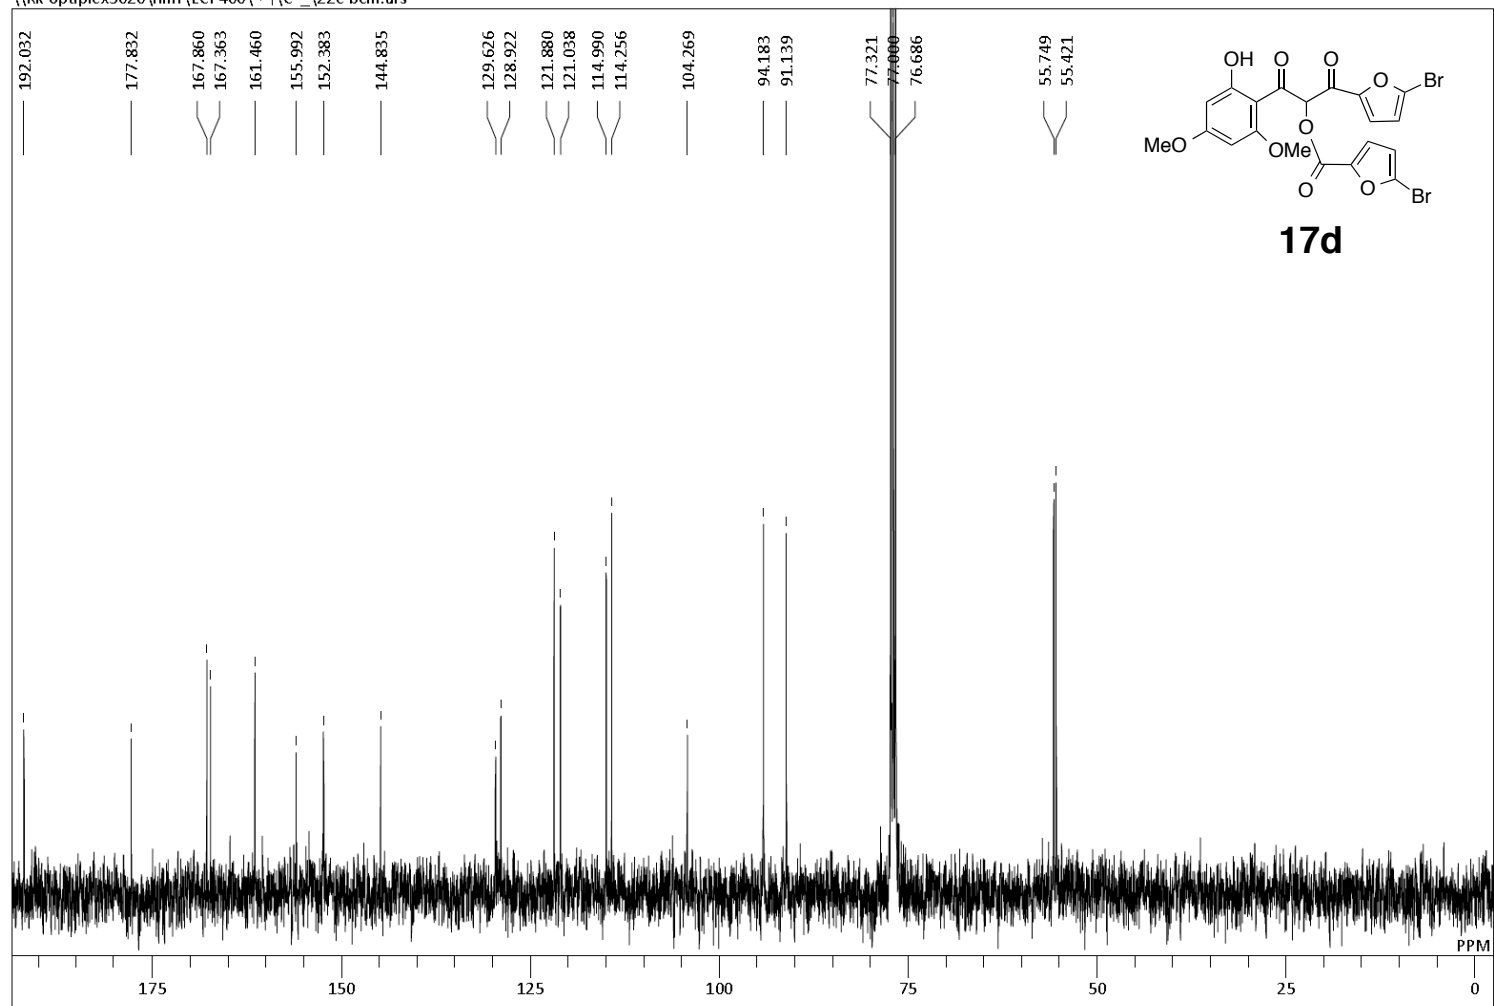

# Compound 19a

\\Kk-optiplex3020\nmr\ECP400\-\C^2\_24a-non.als

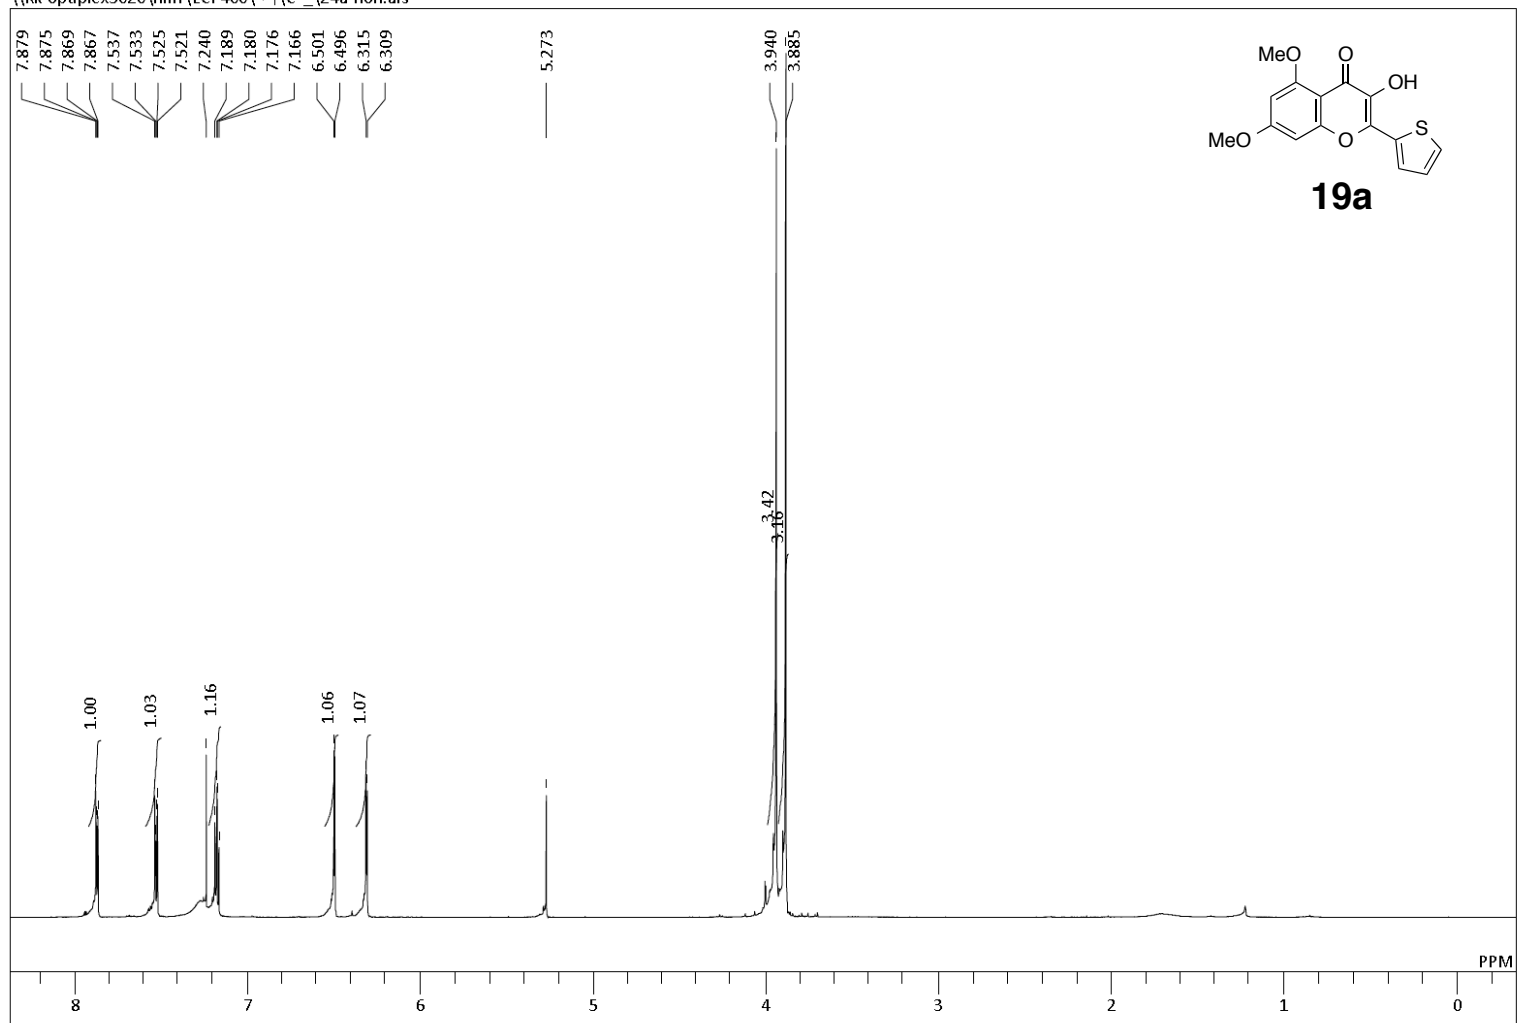



# Compound 19a

\\Kk-optiplex3020\nmr\ECP400\-\C\*\\_24a-bcm.als

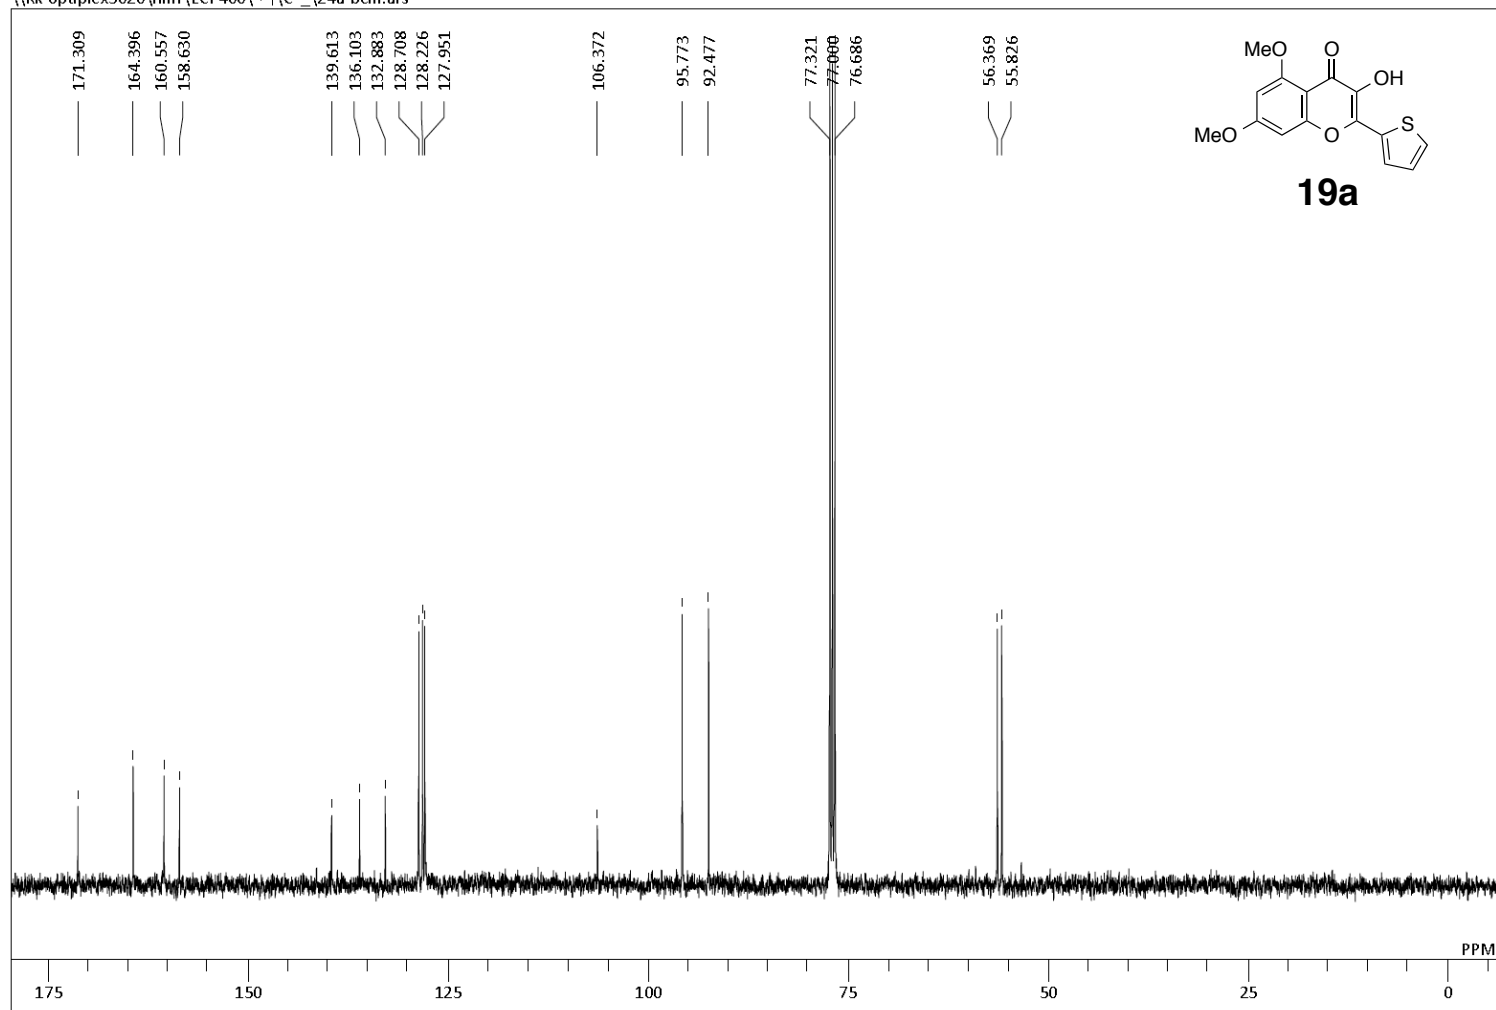

# Compound 19b

\\kk-optiplex3020\nmr\ECP400\-\C\24b-non.als

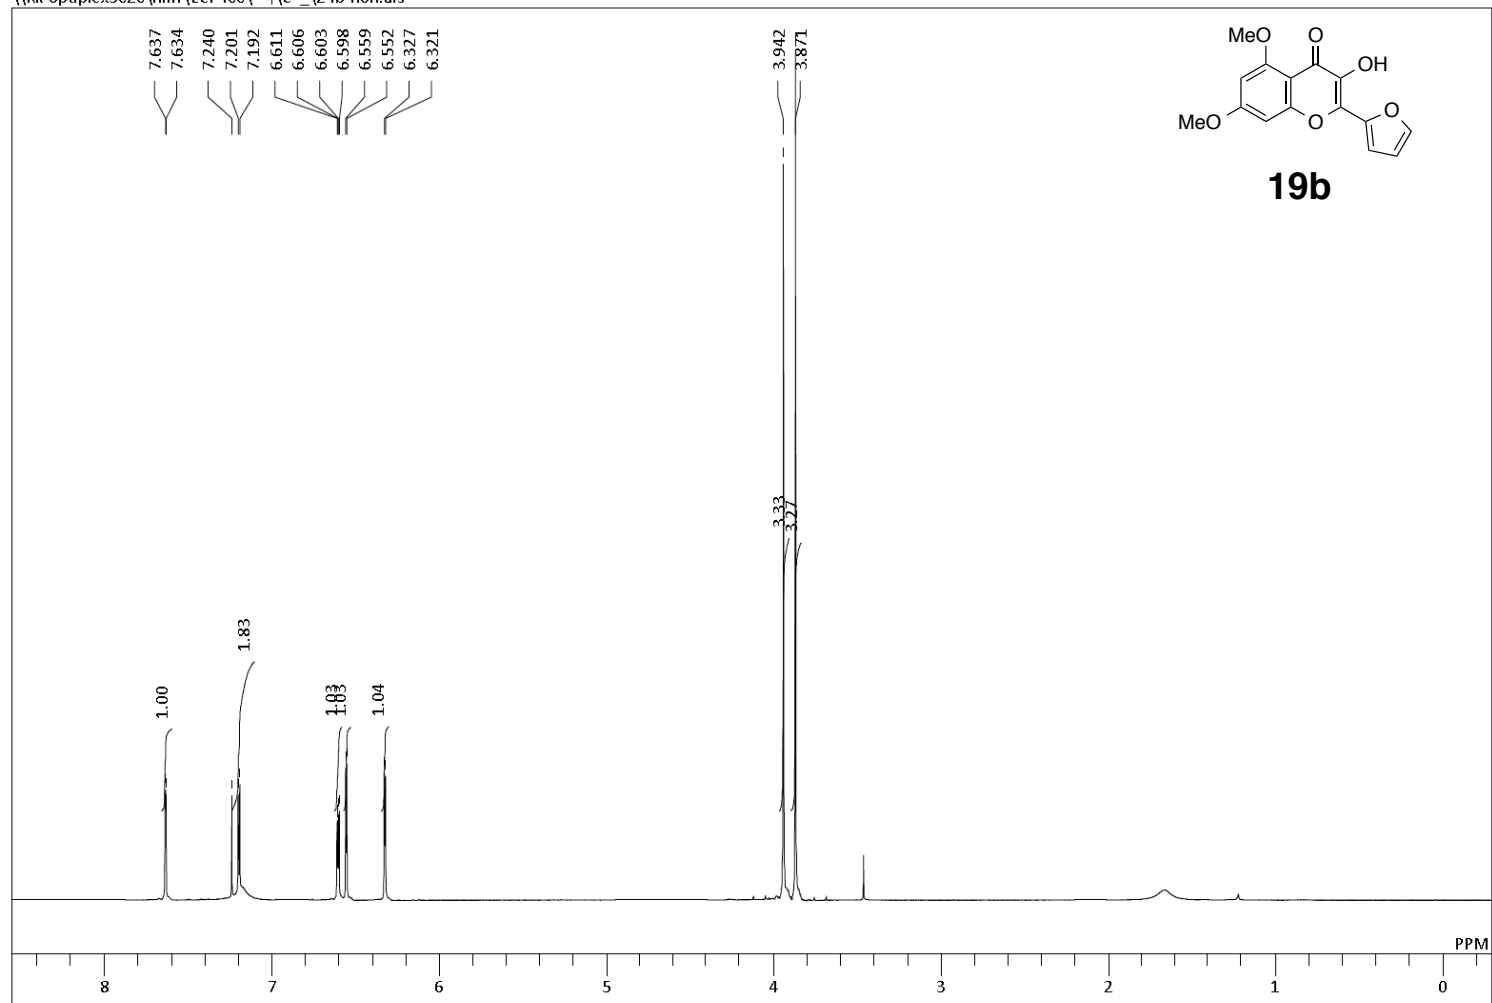

# Compound 19b

\\Kk-optiplex3020\nmr\ECP400\--"i\C~\_24b-bcm.als

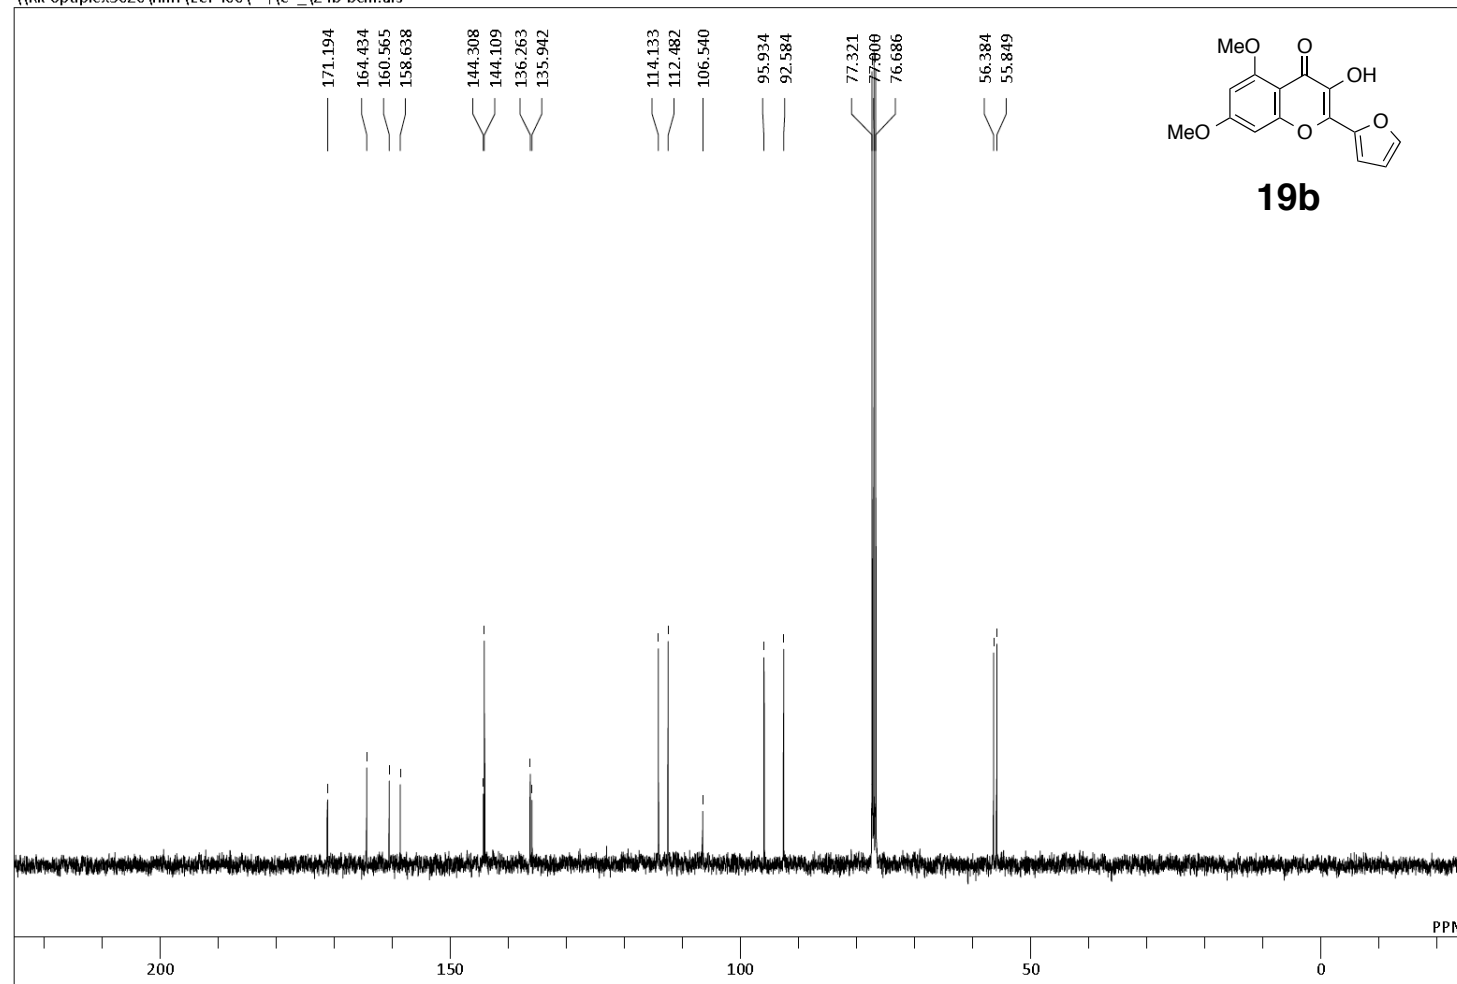

# Compound 19c

Z:\NMR\ECP400\c†-D\kkyt-2-39-1227.als

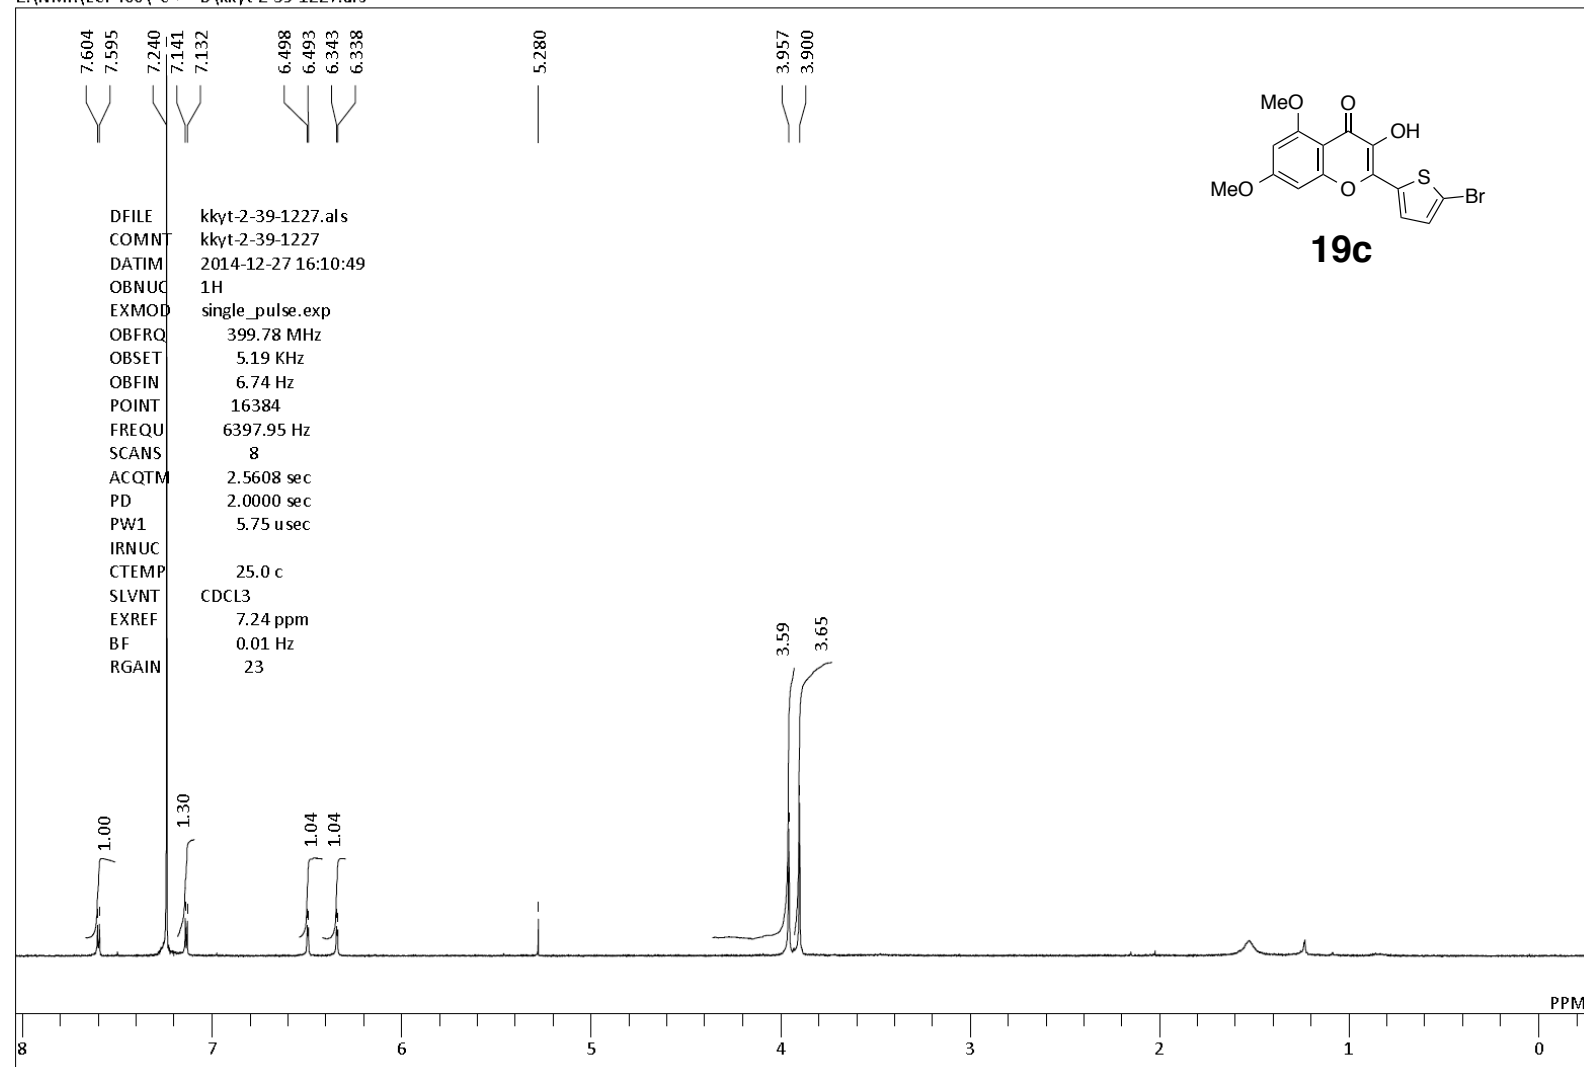

# Compound 19c

Z:\NMR\ECP400\c'+-D\ZACE11\KKYT-1-56\_Carbon-2-3.als

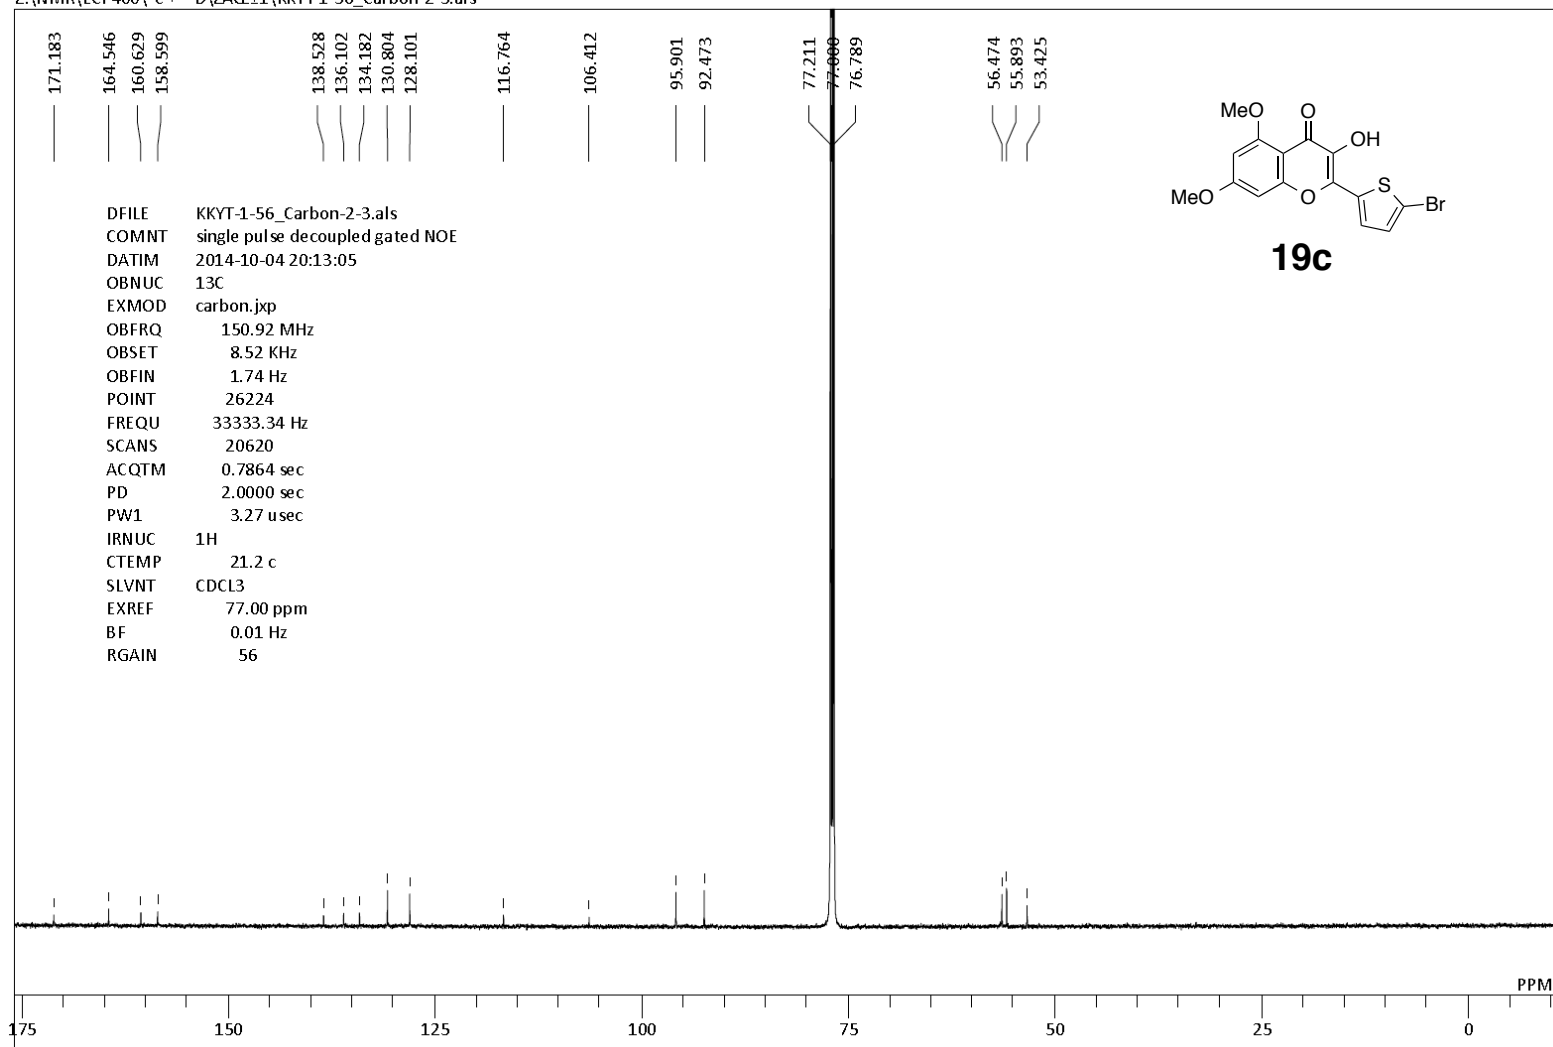

# Compound 19d

\\Kk-optiplex3020\nmr\ECP400\1\1\1\24c-non.als

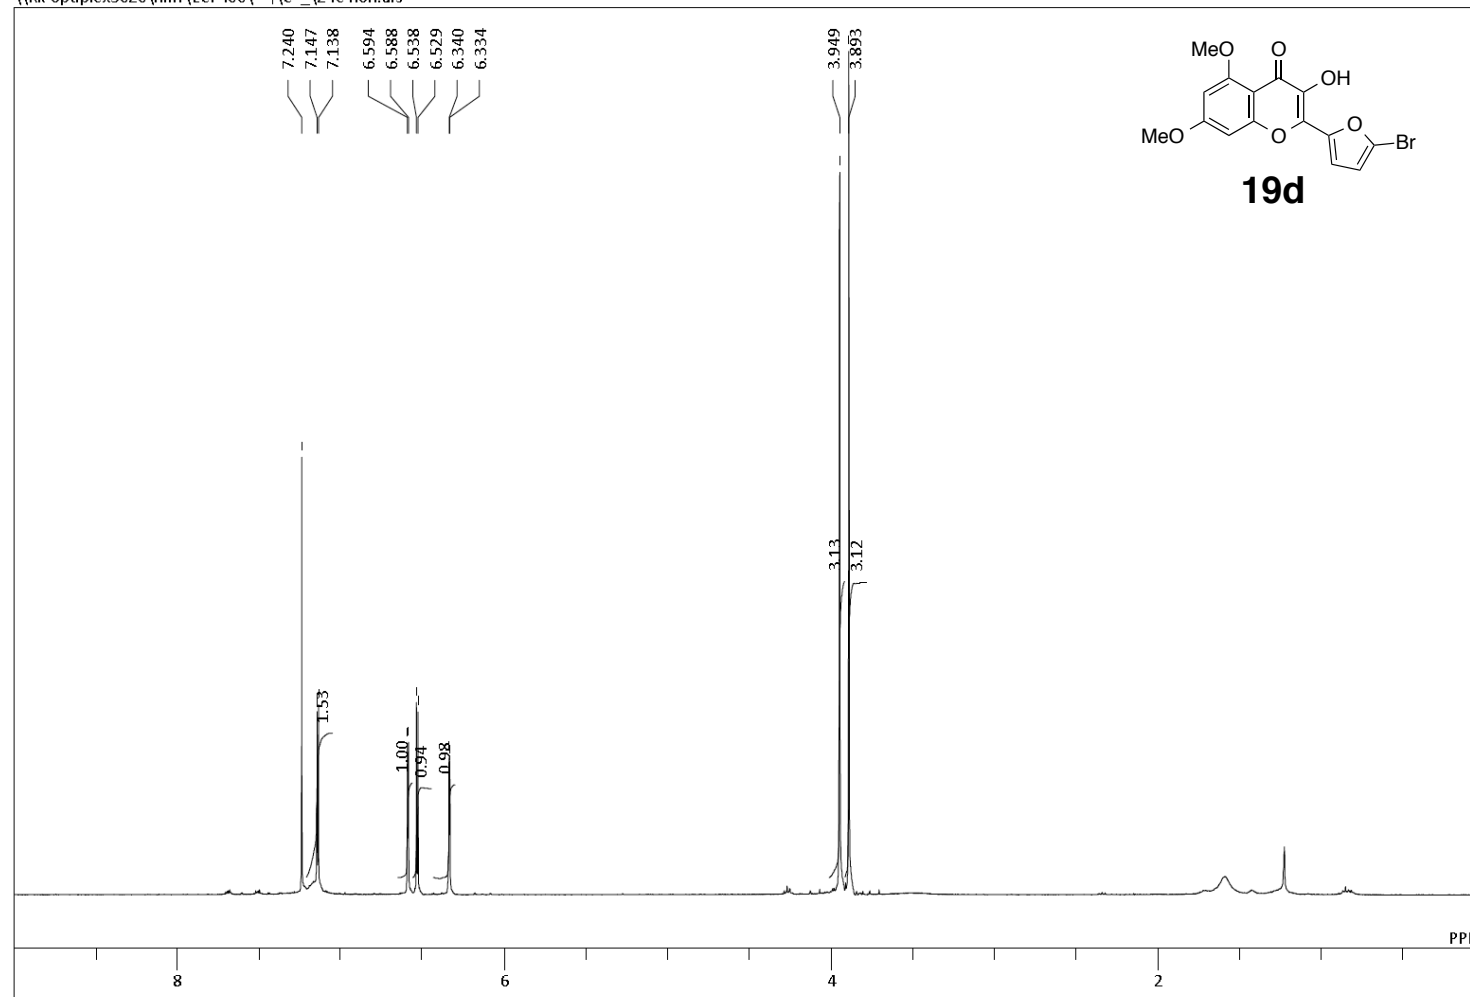

# Compound 19d

\\kk-optiplex3020\nmr\ECP400\-\i\C\*\\_24c-bcm.als

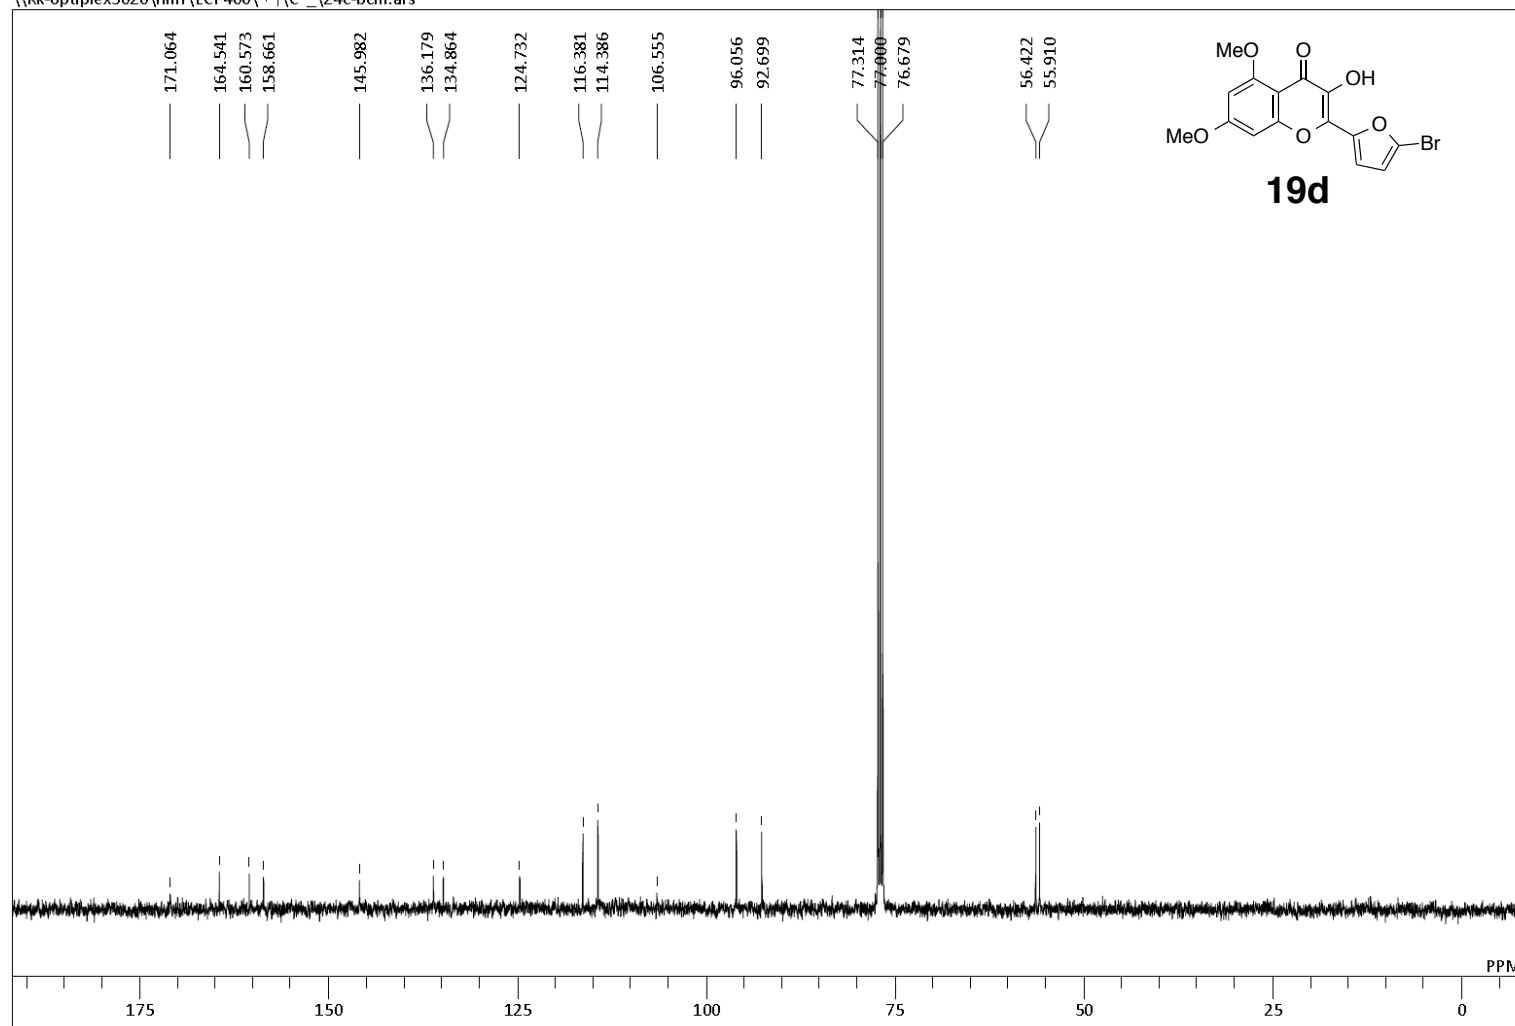





# Compound 22a

\\Kk-optiplex3020\nmr\ECP400\~\C\27a-pyrd5-bcm.als

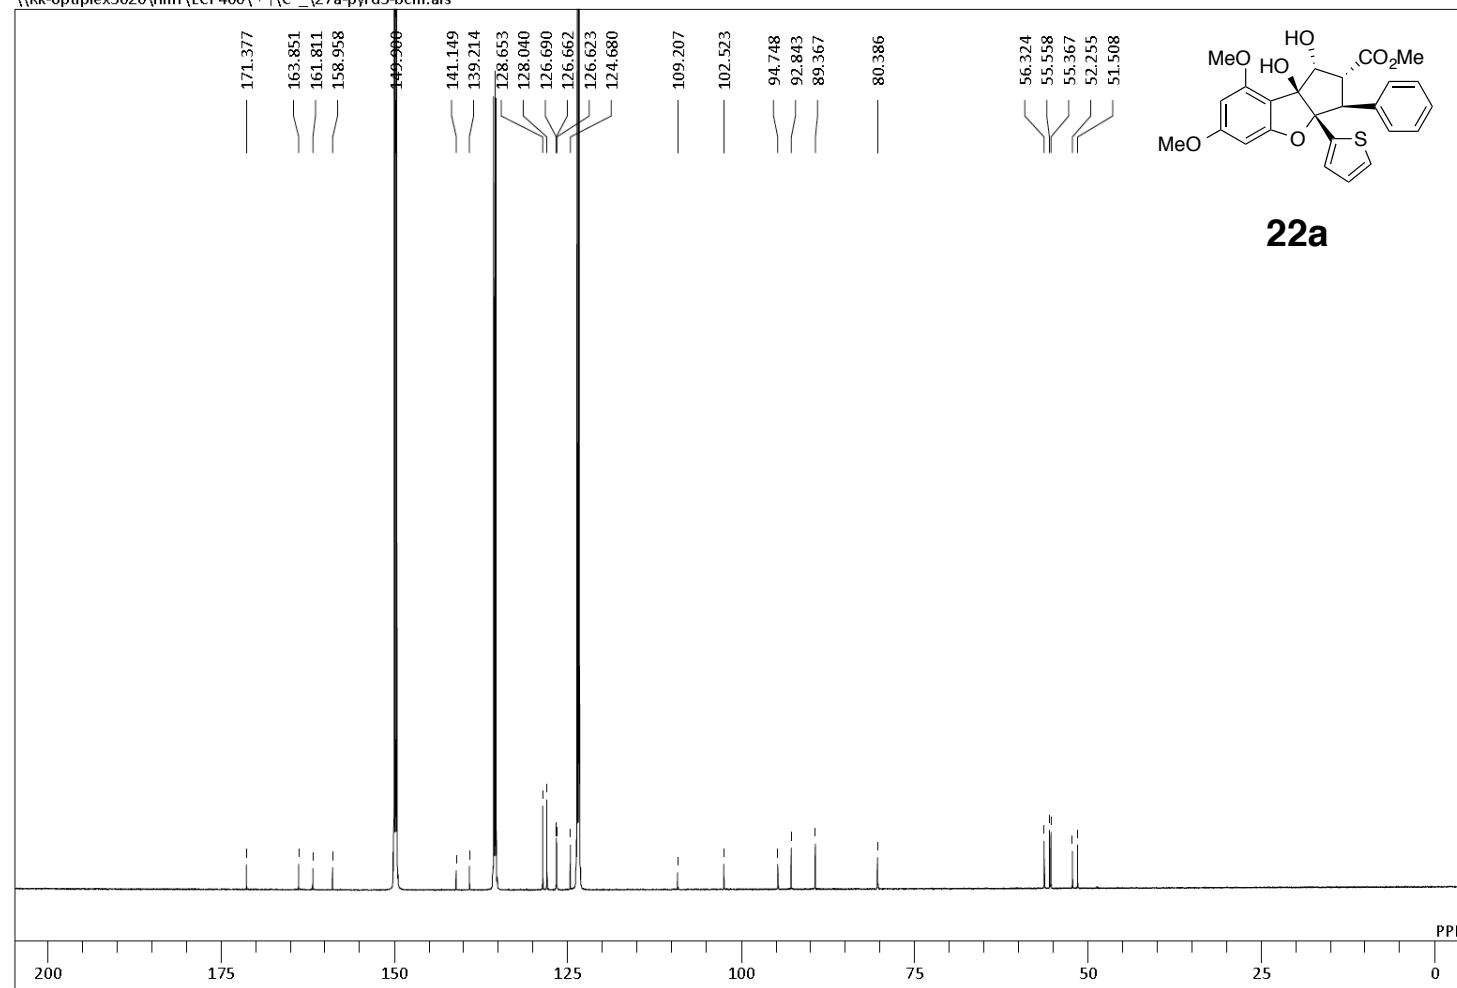

# Compound 22b

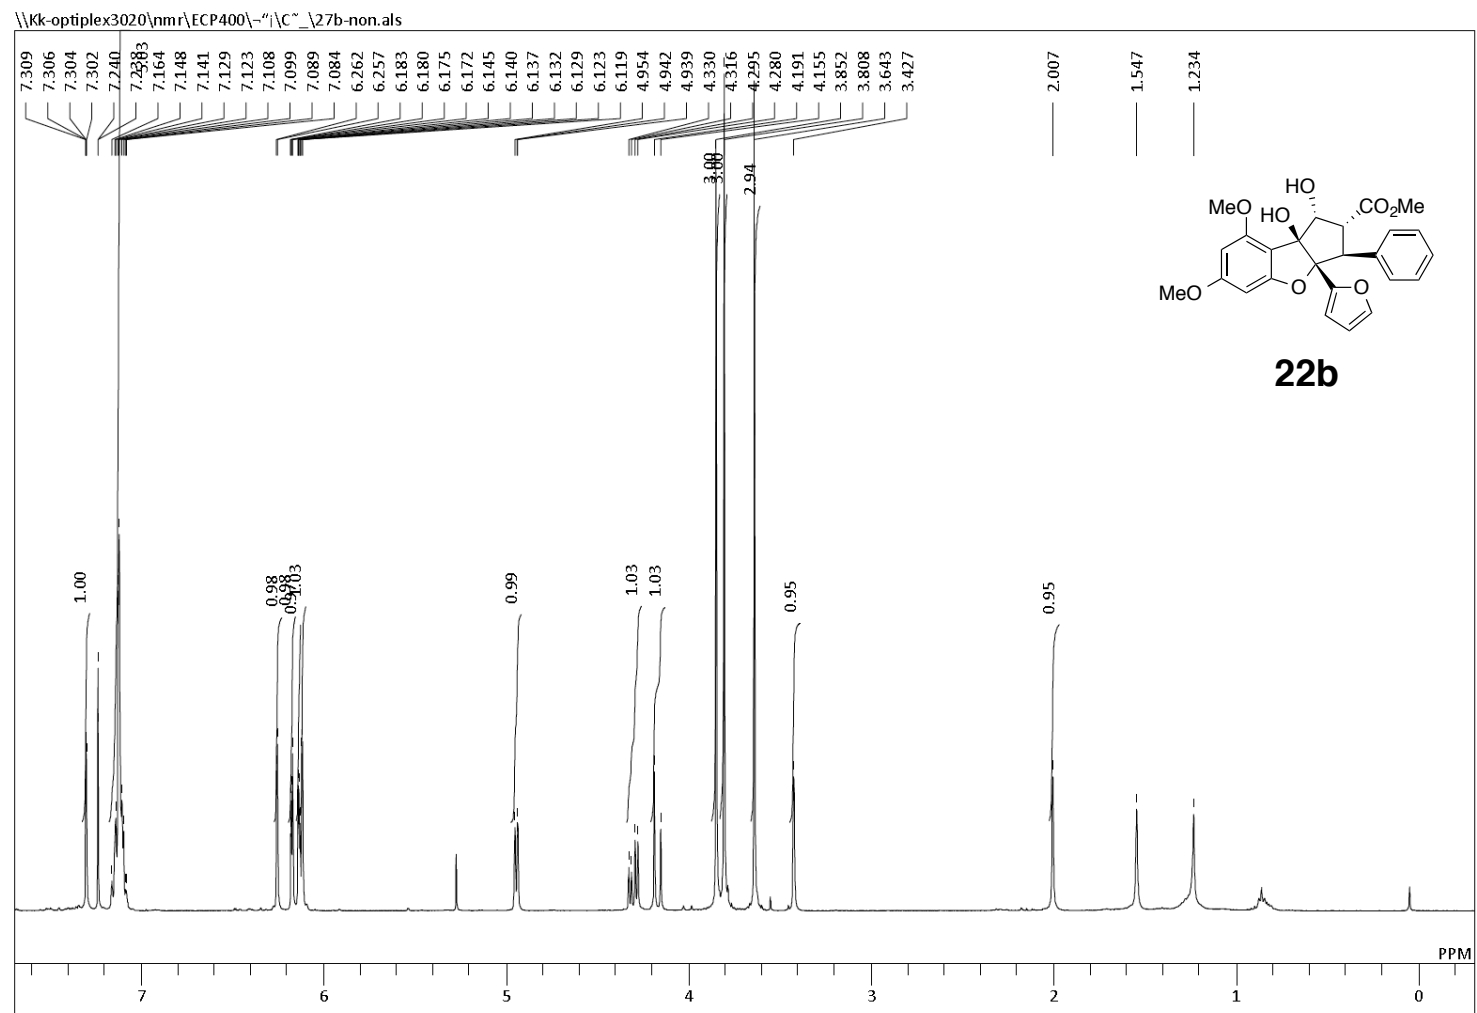

# Compound 22b

\\Kk-optiplex3020\nmr\ECP400\-\\_i\C\\_27b-bcm.als

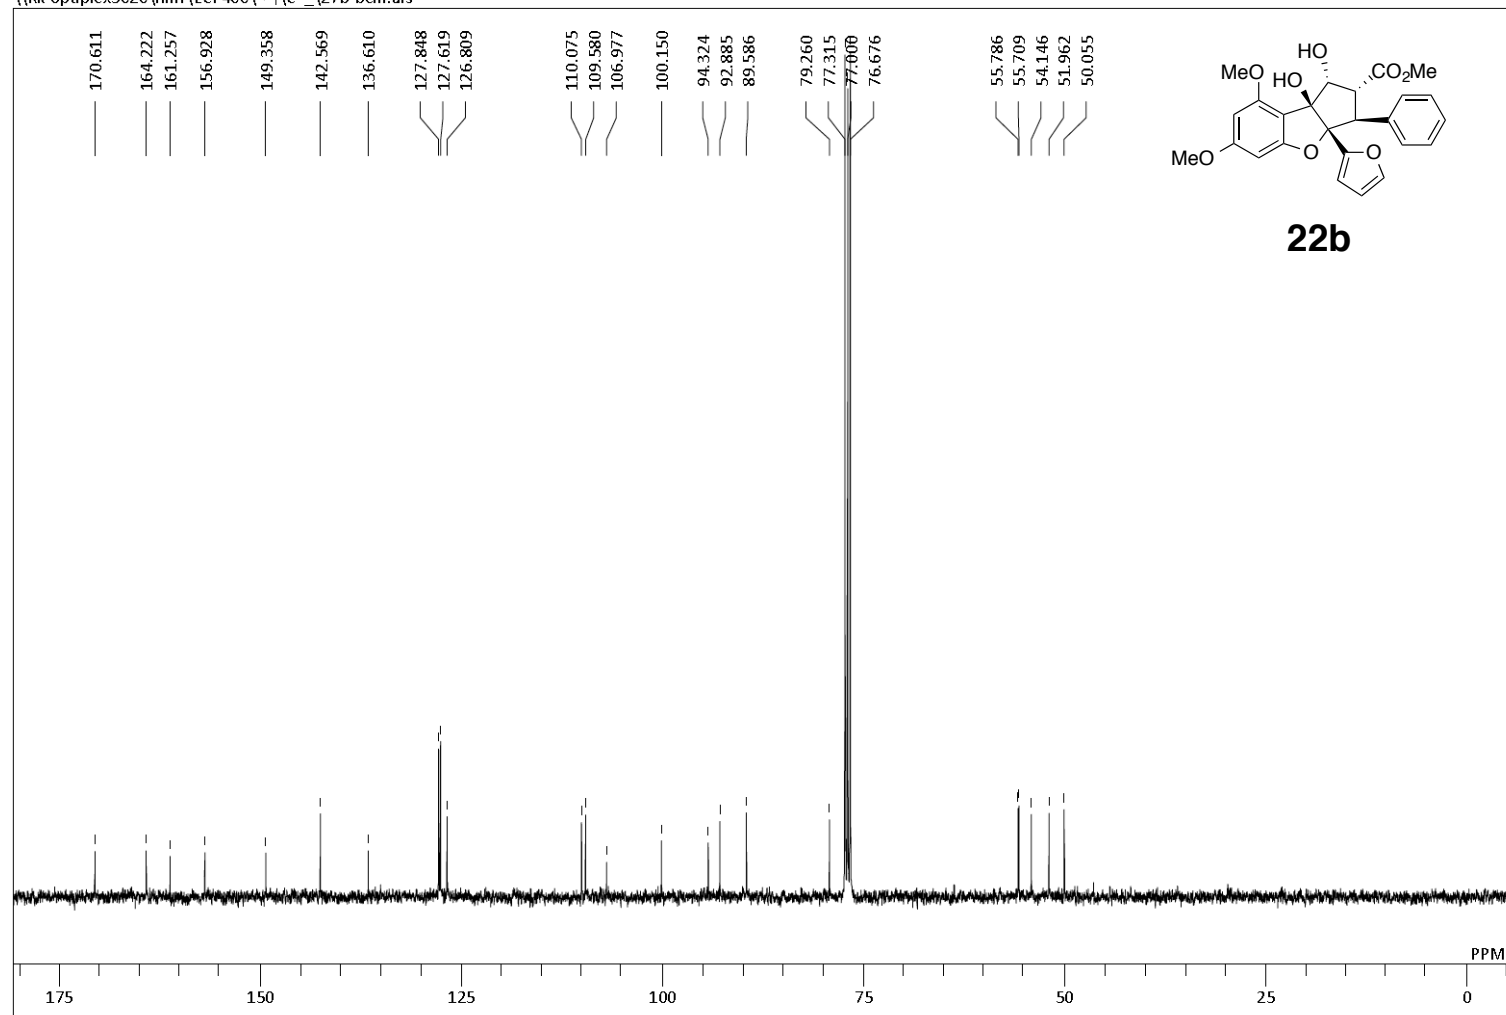

# Compound 22c

Z:\NMR\ECS400\c'+-DcM\kkyt-2-40-HPLC-0413\_proton-1-1.jdf

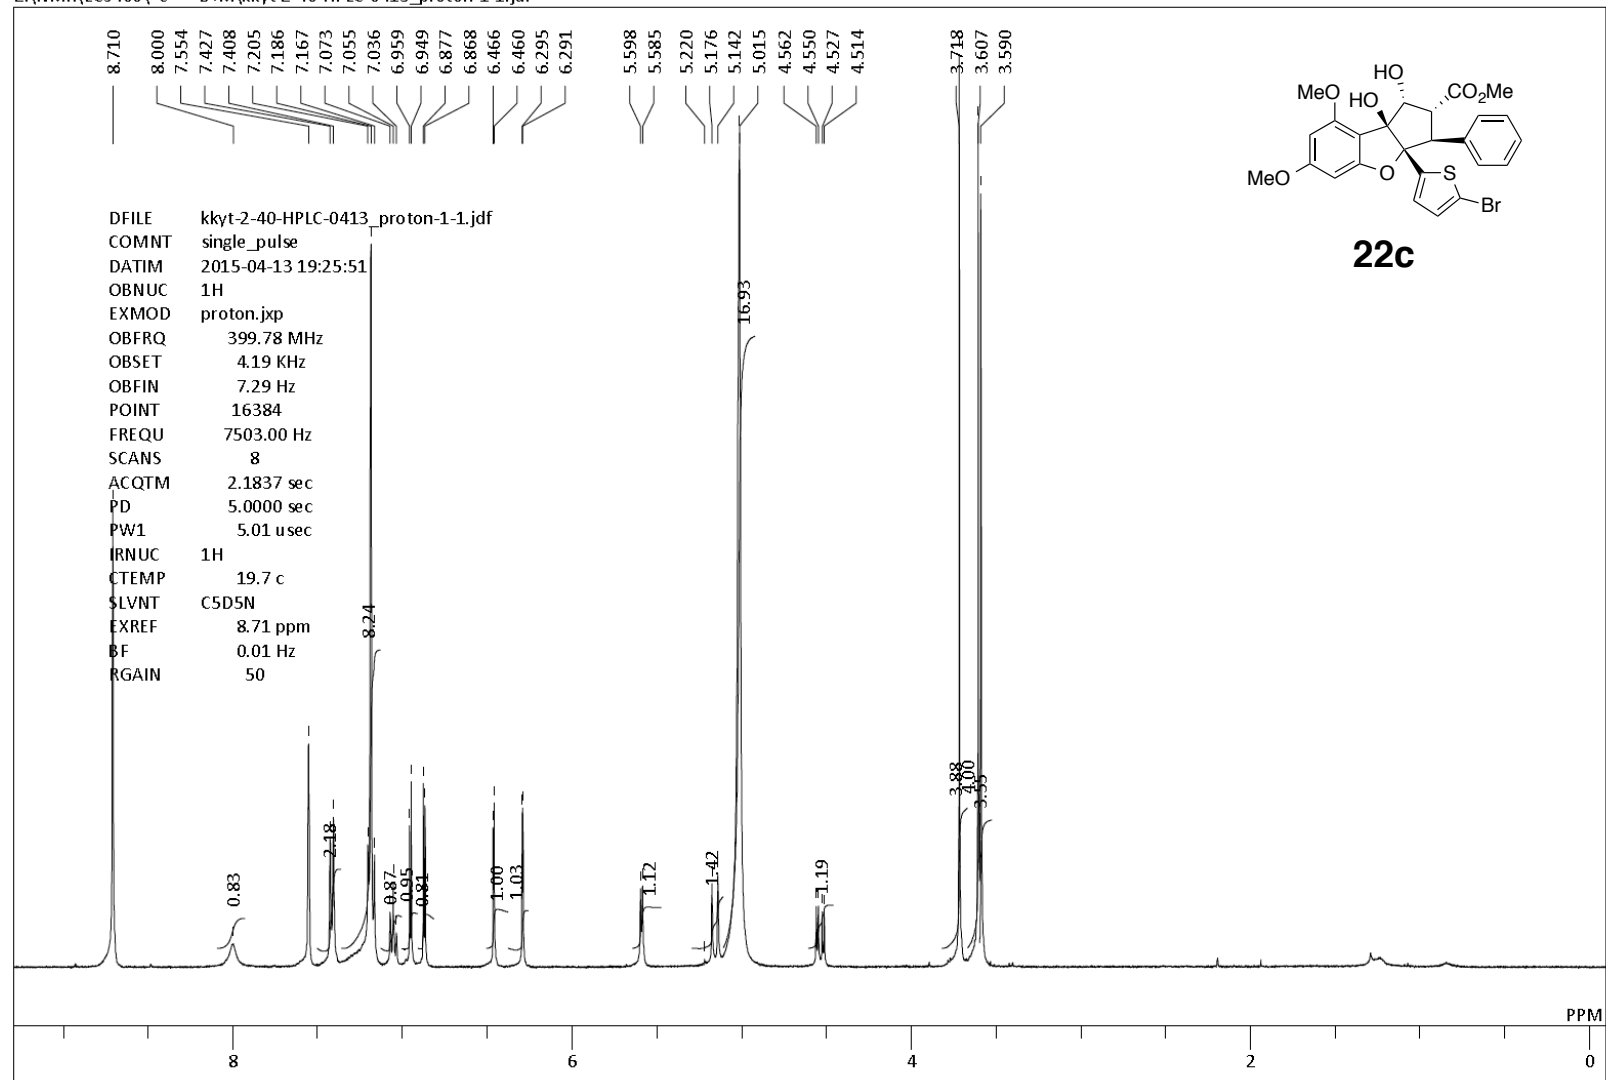

# Compound 22c

Z:\NMR\ECP400\c'+-D\ZACE1\kkyt-1-66-carbone-pyridine.als

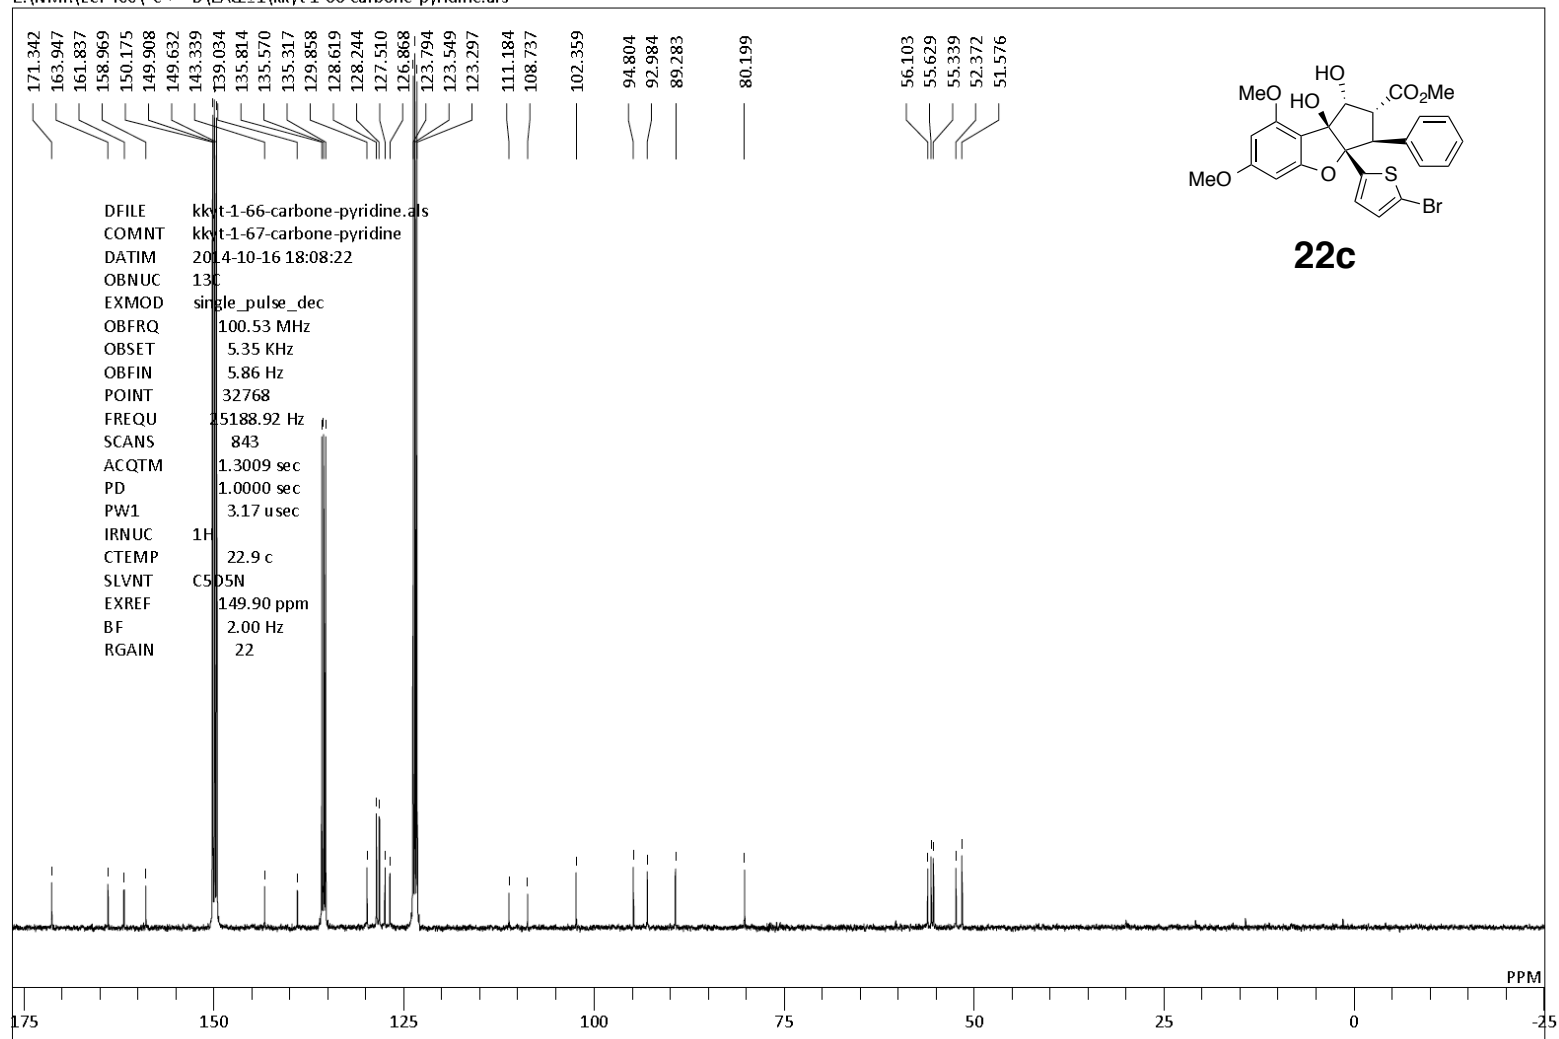

# Compound 22d

\\Kk-optiplex3020\nmr\ECP400\--i\C\*\_27c-non.als

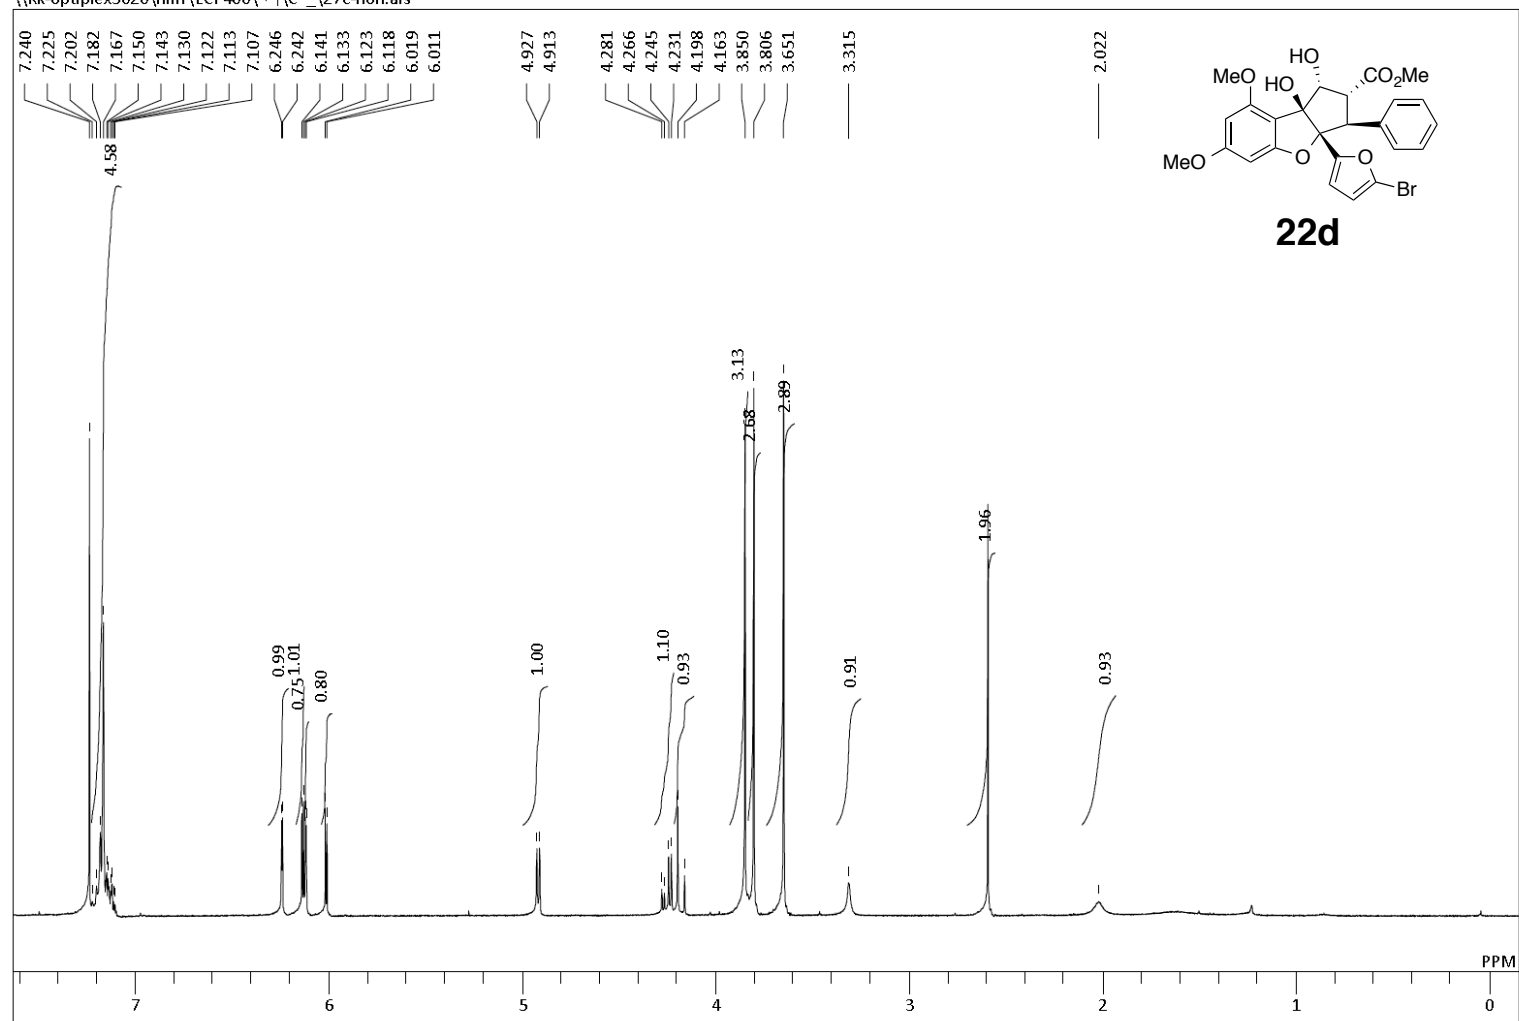

# Compound 22d

\\Kk-optiplex3020\nmr\ECP400\-\i\C\\_\27c-bcm.als

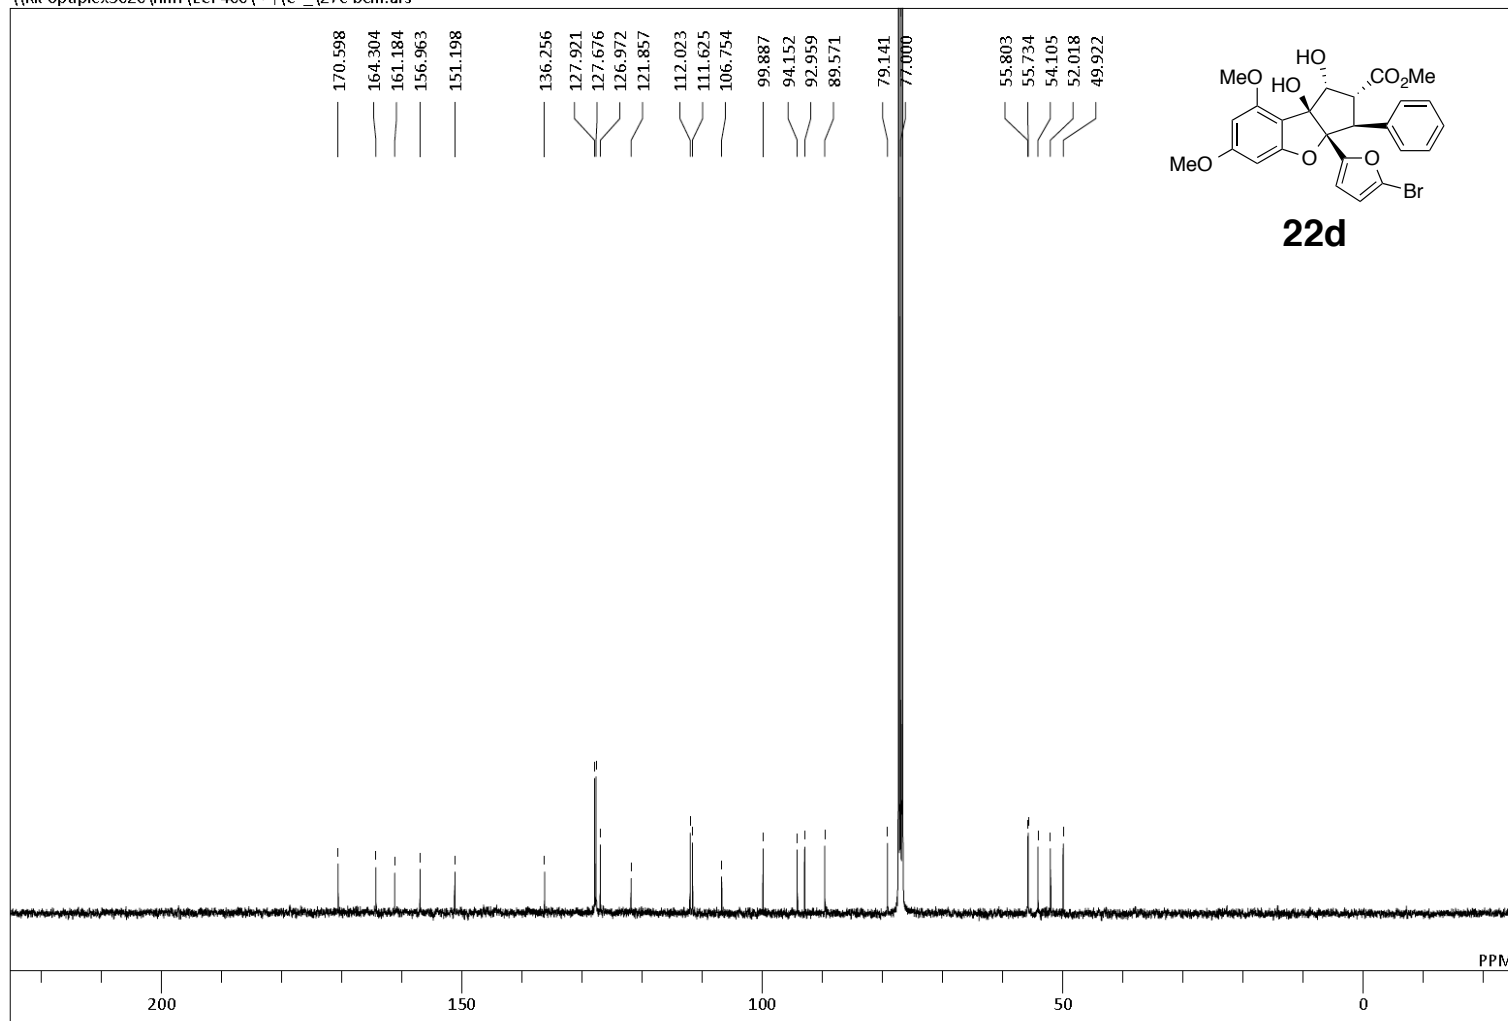

# Compound 23a

\\Kk-optiplex3020\nmr\ECP400\--"i\C\*\_28a-non.als

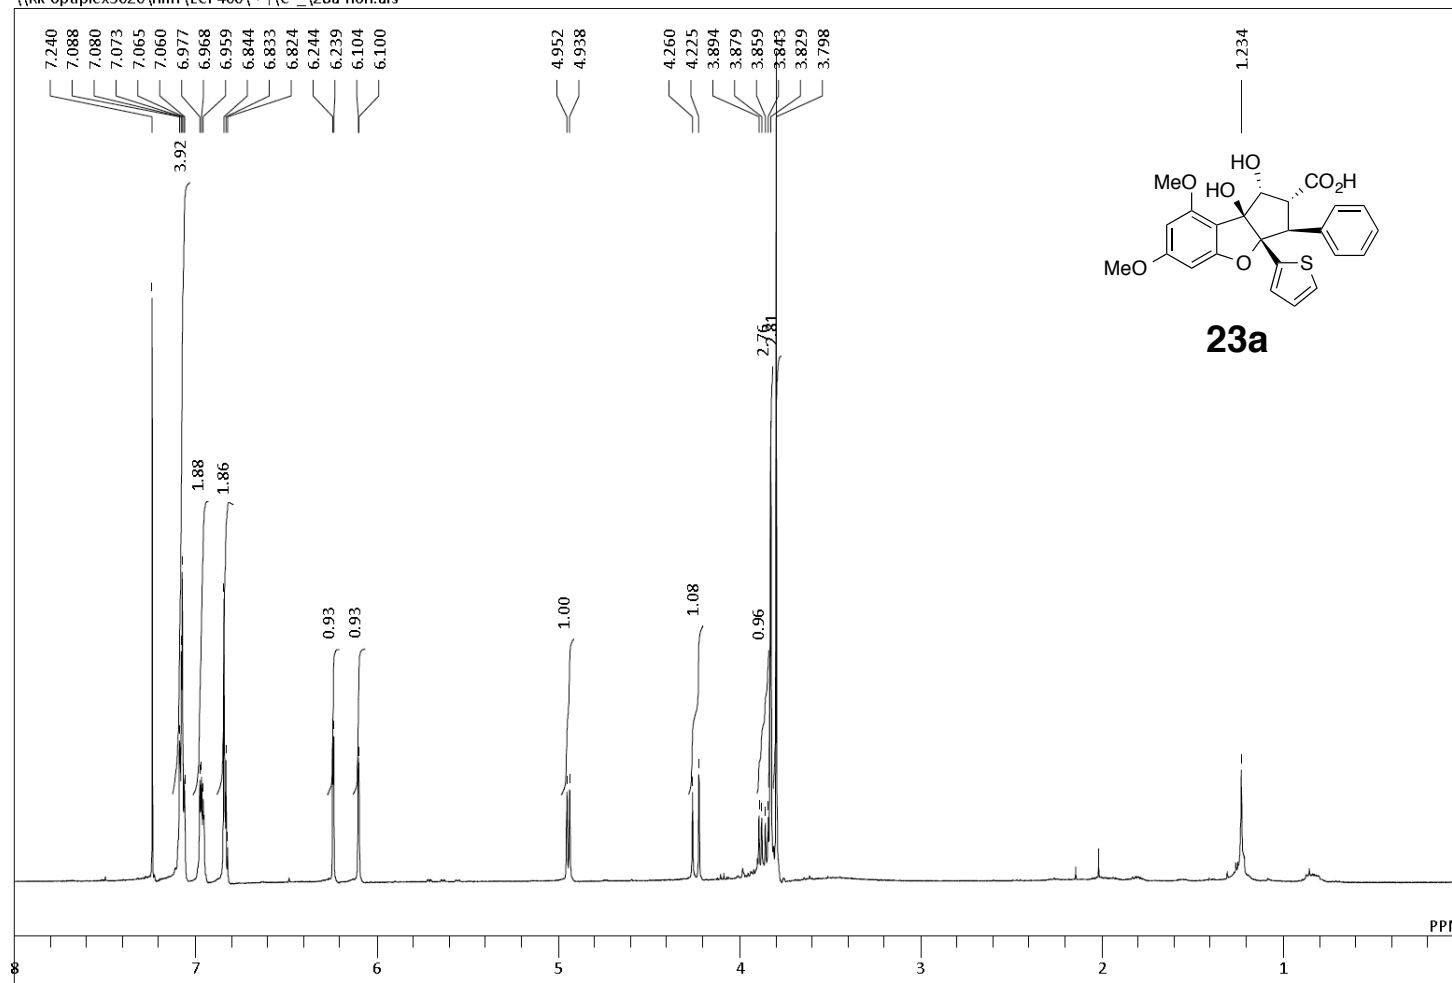



# Compound 23a

\\Kk-optiplex3020\nmr1\ECP400\-'j\C\*\_28a-bcm-new-23a-KKyk-6-6-bcm-140829.als

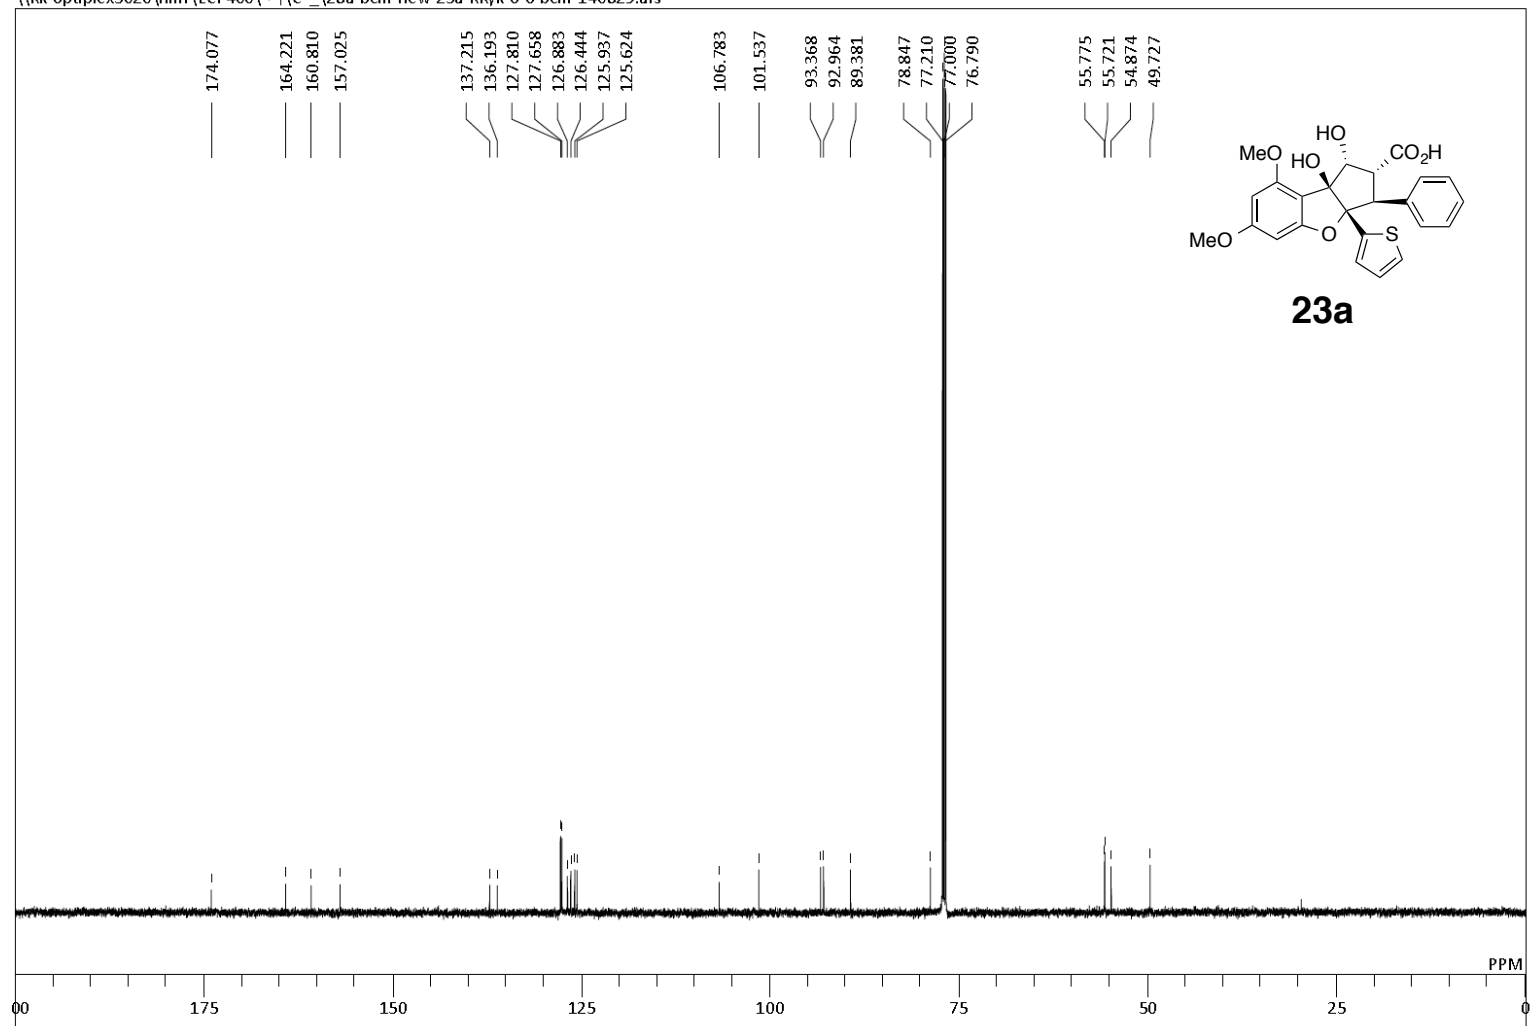

# Compound 23b

\\Kk-optiplex3020\nmr\ECP400\~\C~\_28b-non.als

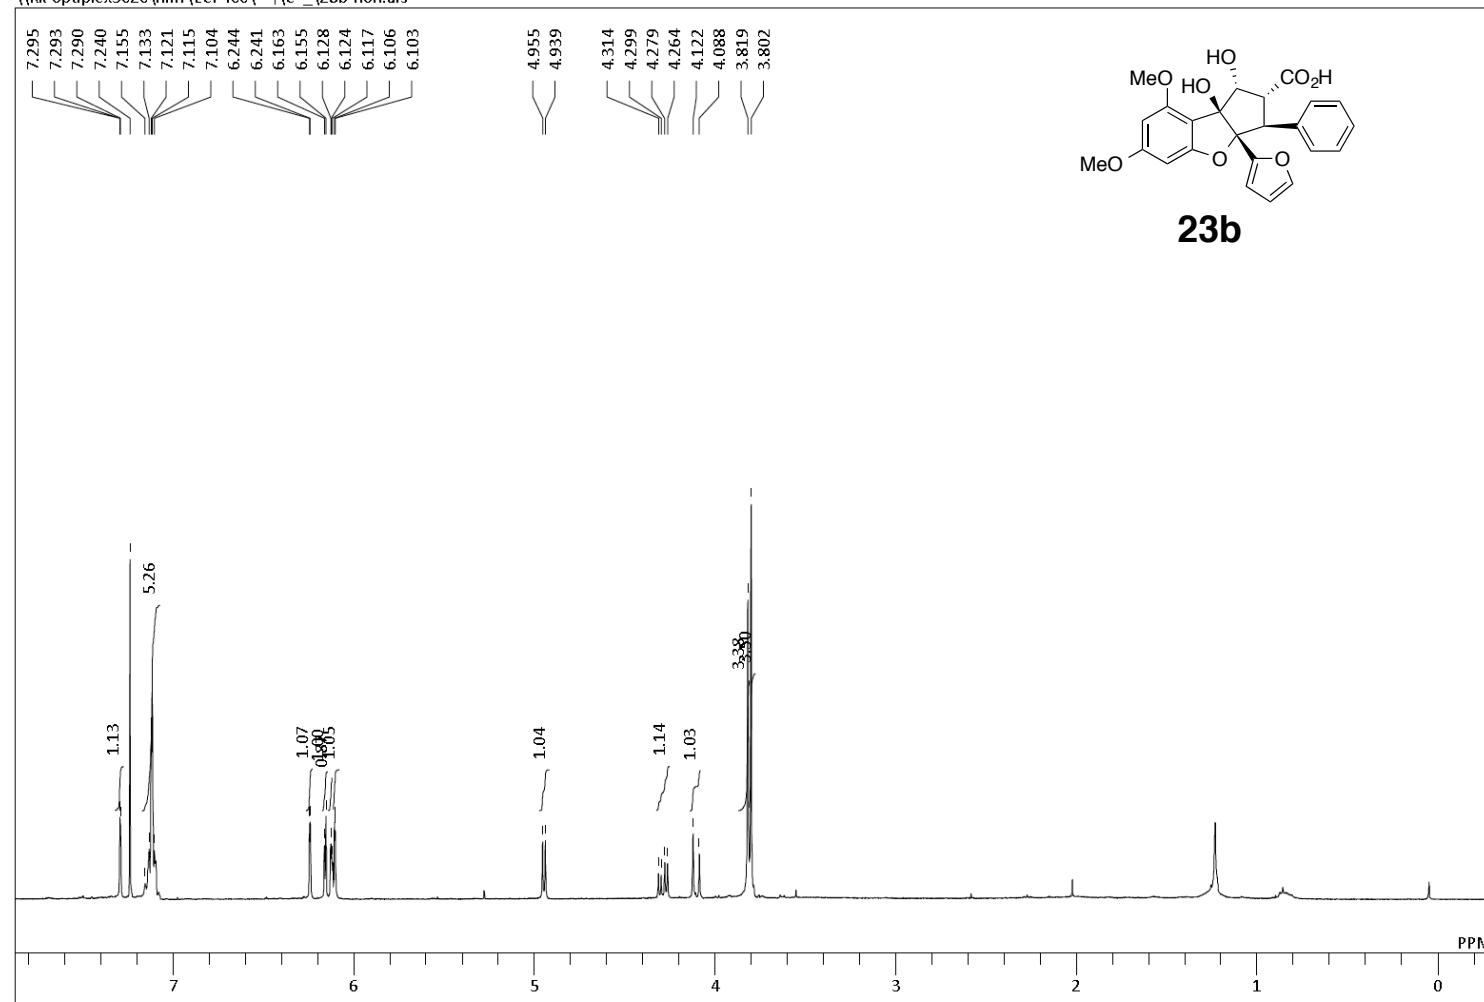

# Compound 23b

\\kk-optiplex3020\nmr\ECP400\~"i\C\*\_28b-bcm.als

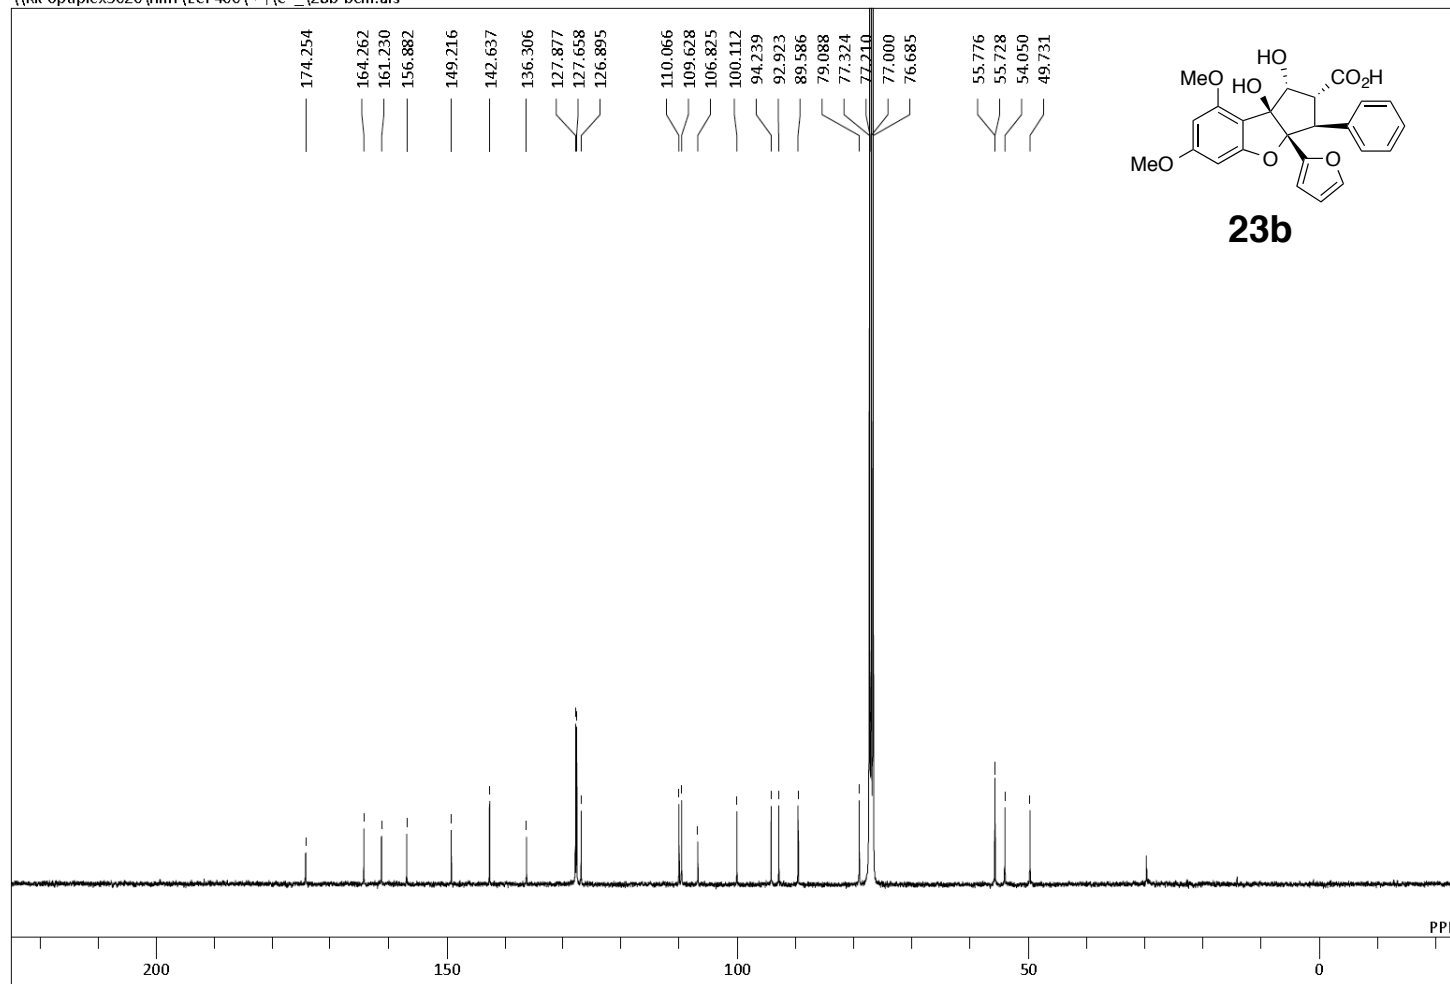

# Compound 23c

Z:\NMR\WCP400\田中\Ykkyt-2-20-HPLC-0418 Proton ft-1-1.als

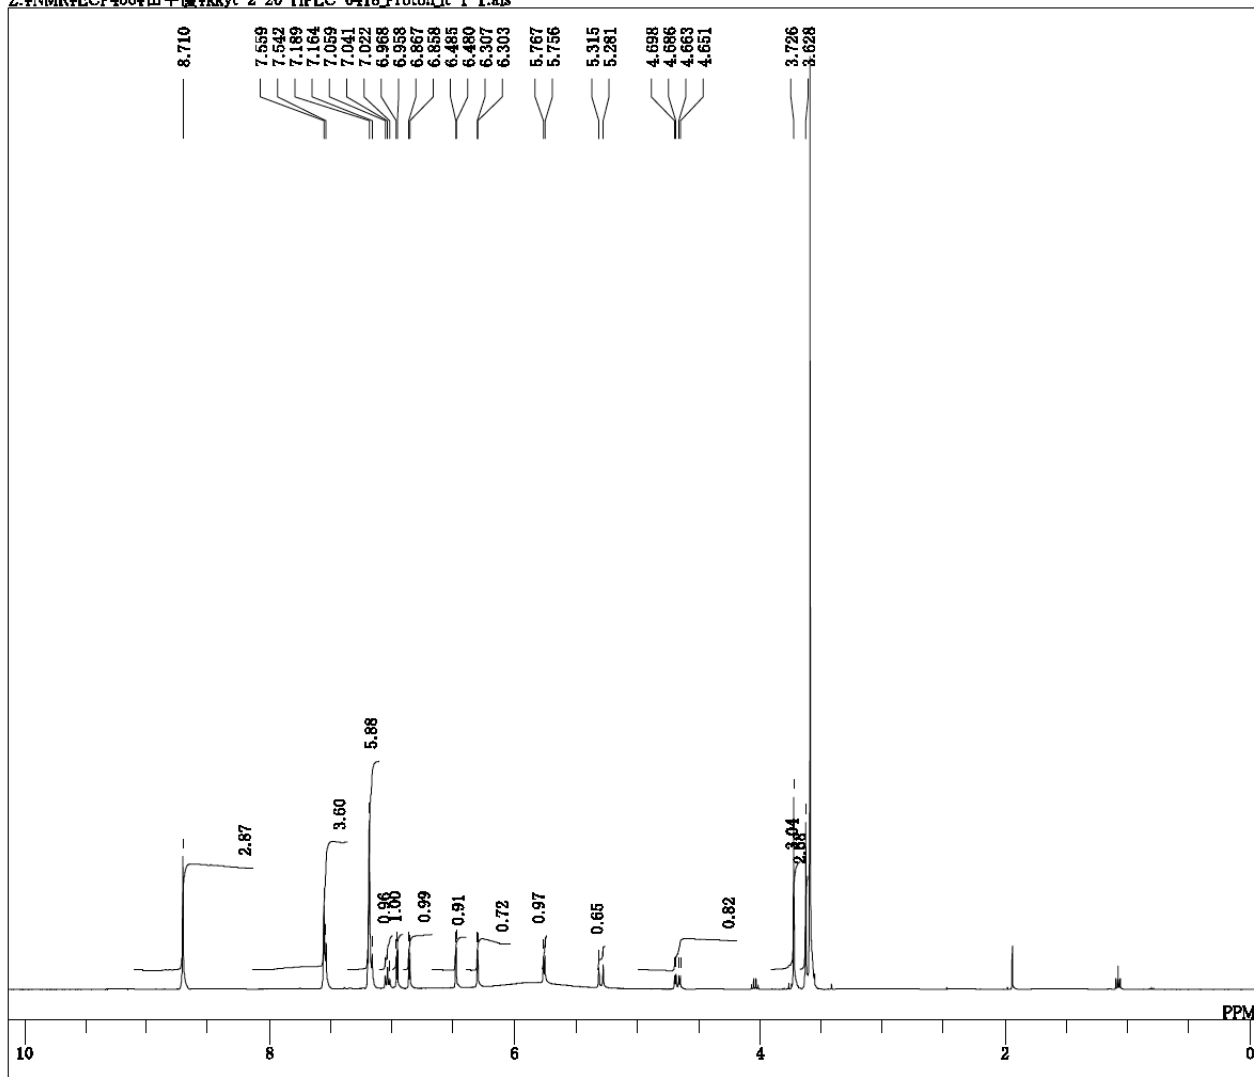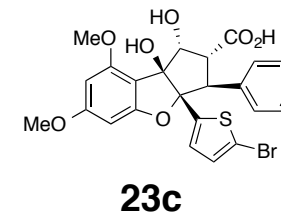

# Compound 23c

Z:\NMR\ECP400\c'+-D\kkyt-2-20-pyridine-carbone.als

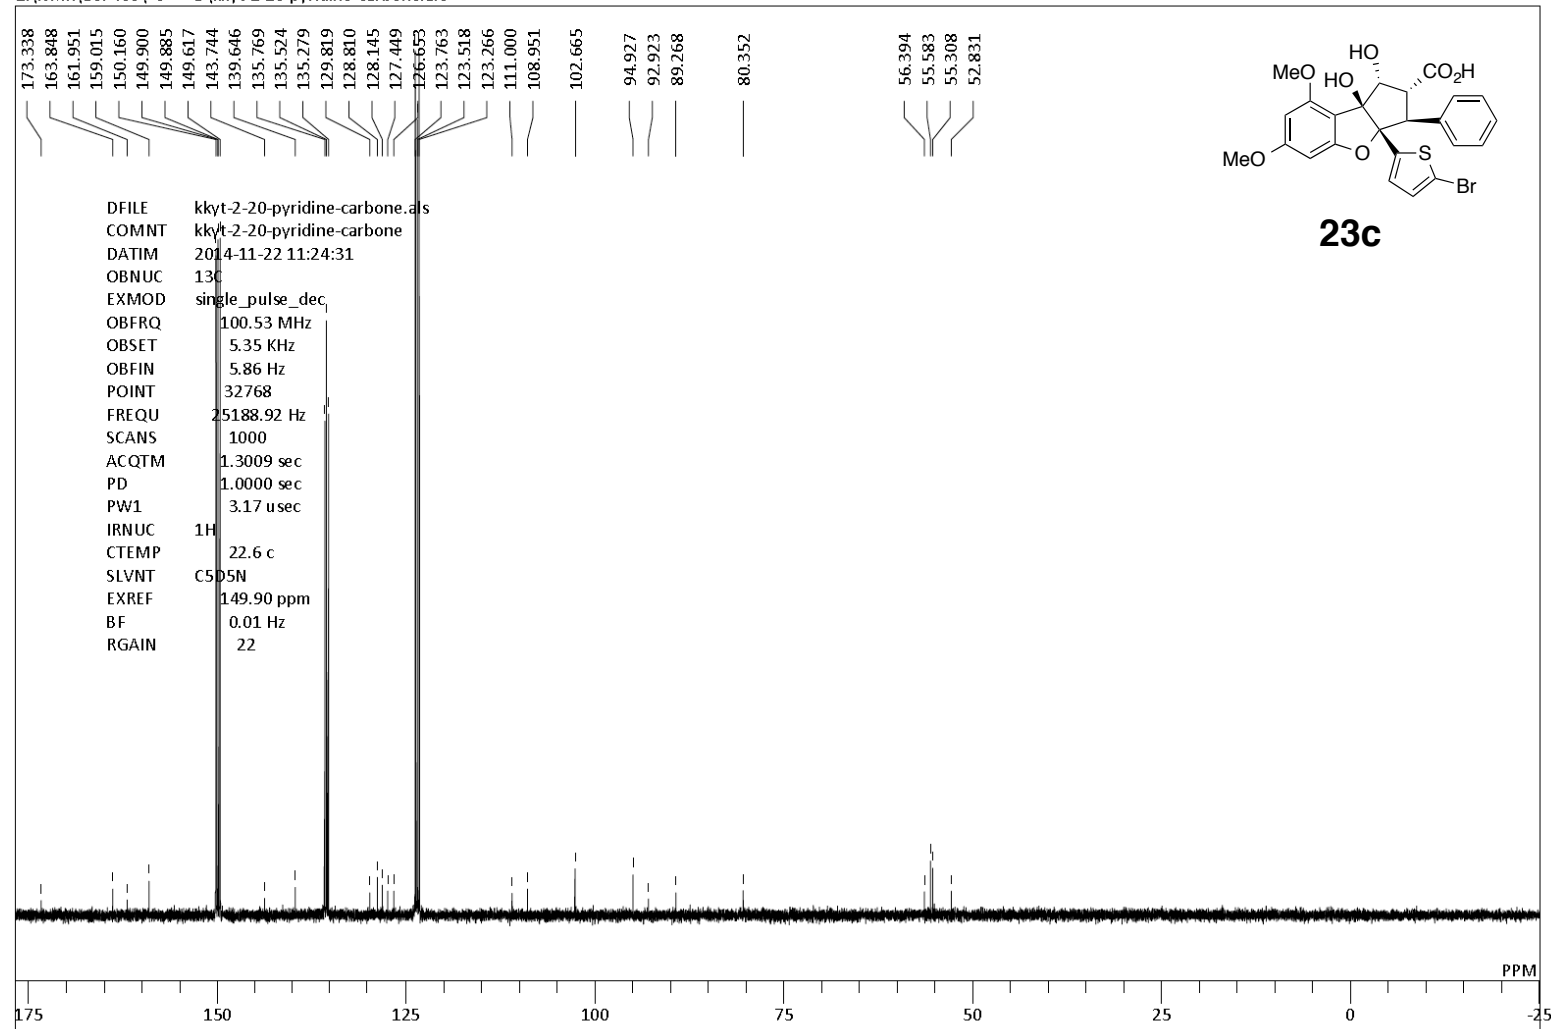

# Compound 23d

\\Kk-optiplex3020\nmr\ECP400\-\^i\C~\_28c-cd3od-non.als

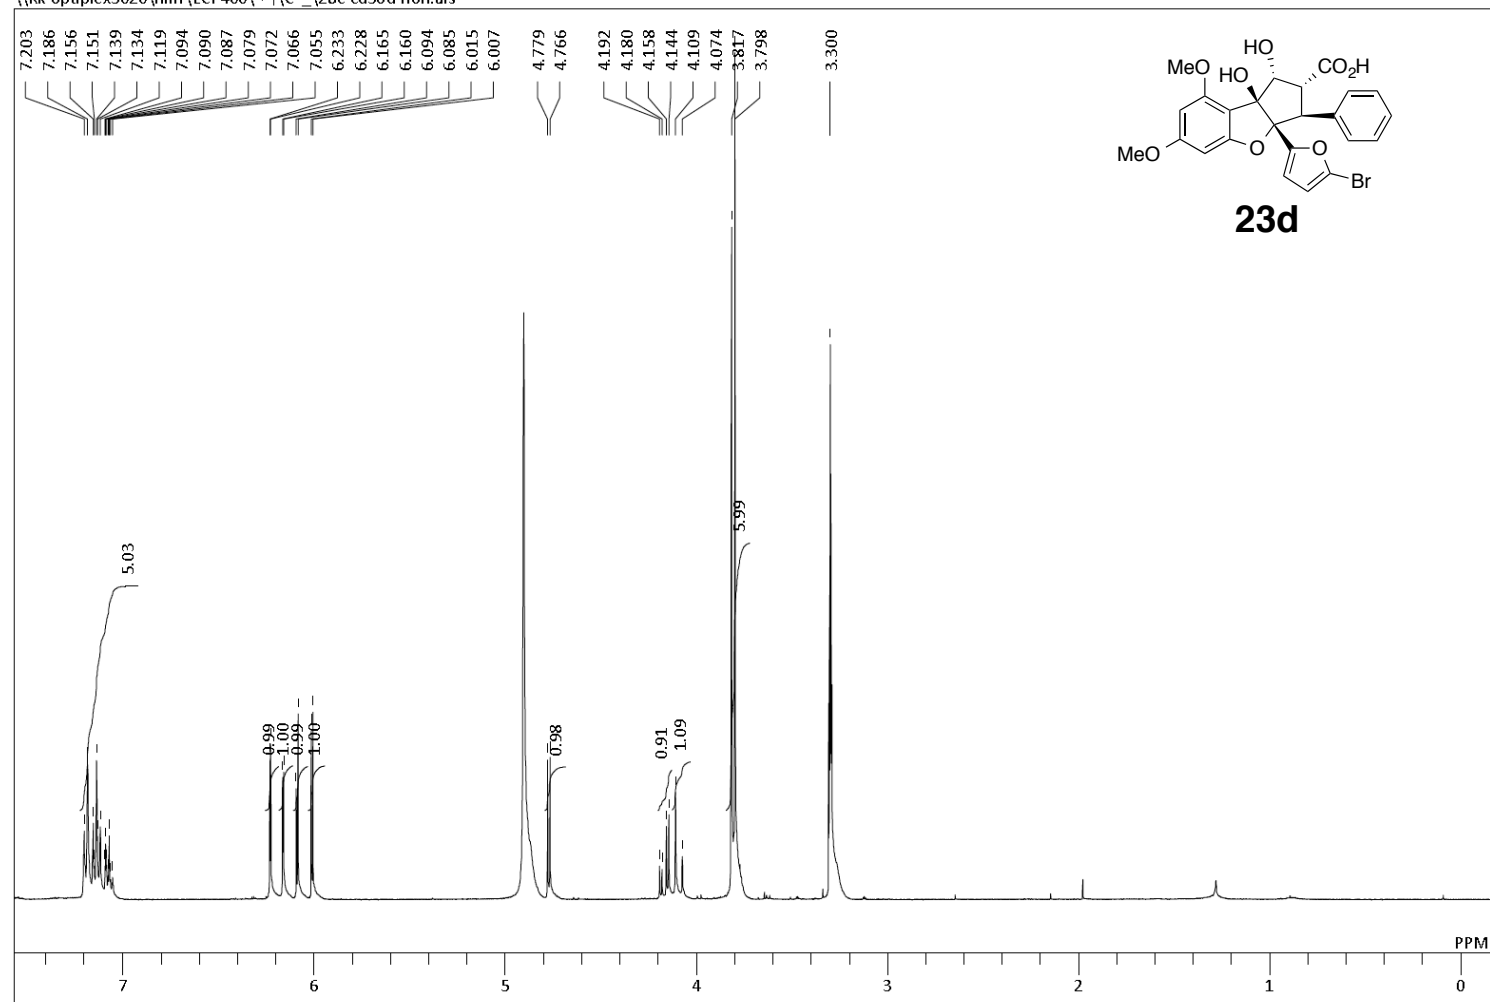

# Compound 23d

\\kk-optiplex3020\nmr\ECP400\-\i\C~\_28c-cd3od-bcm.als

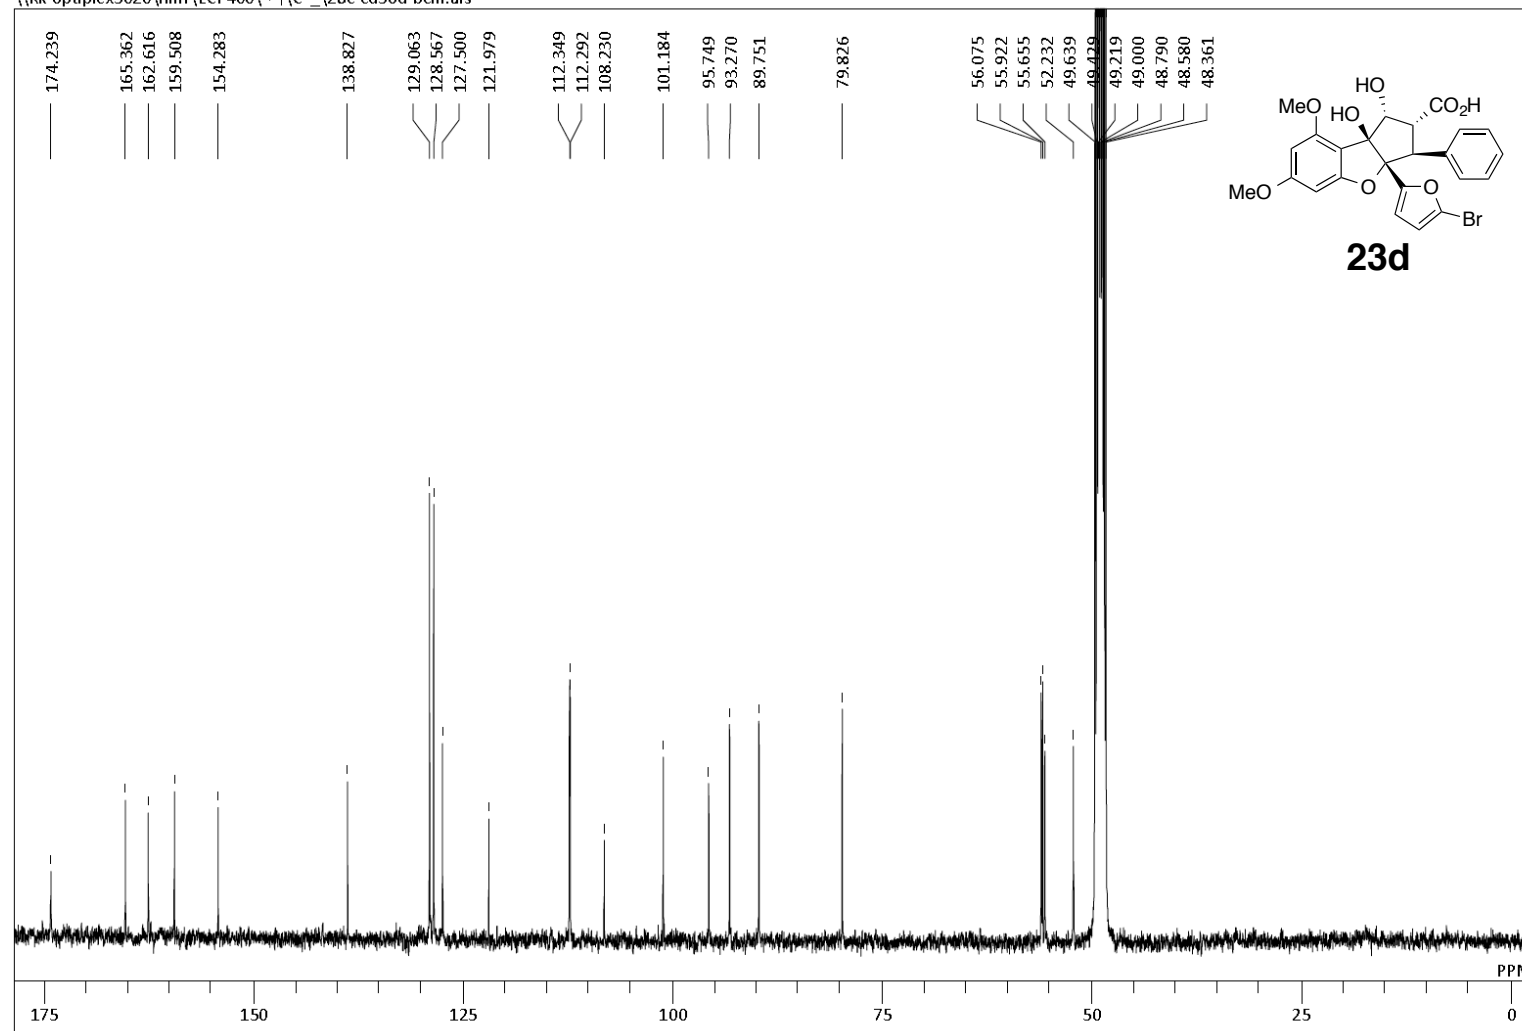

Supplement: c5ob02537k1.pdf [file c5ob02537k1.pdf]
